# Supplementary material for: Assessing the Effects of Rotifer Feed Enrichments on Turbot (Scophthalmus maximus) Larvae and Post-Larvae Gut-Associated Bacterial Communities
Source: MDPI journal article supplement (doi:10.3390/microorganisms11020520), 2023-02-17
Supplement: s1 [file s1]

# Assessing the Effects of Rotifer Feed Enrichments on Turbot (*Scophthalmus maximus*) Larvae and Post-Larvae Gut-Associated Bacterial Communities

Antonio Louvado<sup>1</sup>, Carolina Castro<sup>2</sup>, Davide A. M. Silva<sup>1</sup>, Vanessa Oliveira<sup>1</sup>, Luís E. C. Conceição<sup>3</sup>, Daniel F. R. Cleary<sup>1</sup> and Newton C. M. Gomes<sup>1\*</sup>

<sup>1</sup>Department of Biology and Centre for Environmental and Marine Studies (CESAM), University of Aveiro, 3810-193 Aveiro, Portugal

<sup>2</sup>Flatlantic—Actividades Piscícolas, SA 3070-732 Praia de Mira, Portugal

<sup>3</sup>SPAROS Lda., 8700-221 Olhao Portugal

Email: gomesncm@ua.pt

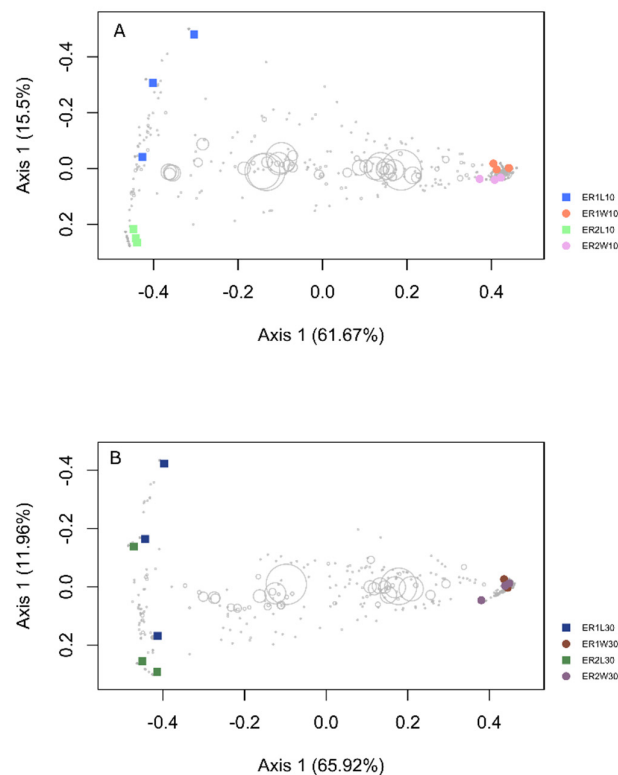

Supplementary Figure S1- First two axis of PCO of samples of the host and water associated bacterial communities at 10 DAH (A) and 30 DAH (B) . Colored symbols are samples. Grey symbols are weighted averages scores for ASV (size is proportional to abundance). ER1 and ER2 corresponds to the different rotifers diets. ER1L10 and ER2L10 (whole larvae at 10 DAH); ER1L30 and ER2L30 (post-larvae gut at 30 DAH); ER1W10 and ER2W10 (rearing water at 10DAH); ER1W30 and ER2W30 (rearing water at 30 DAH).

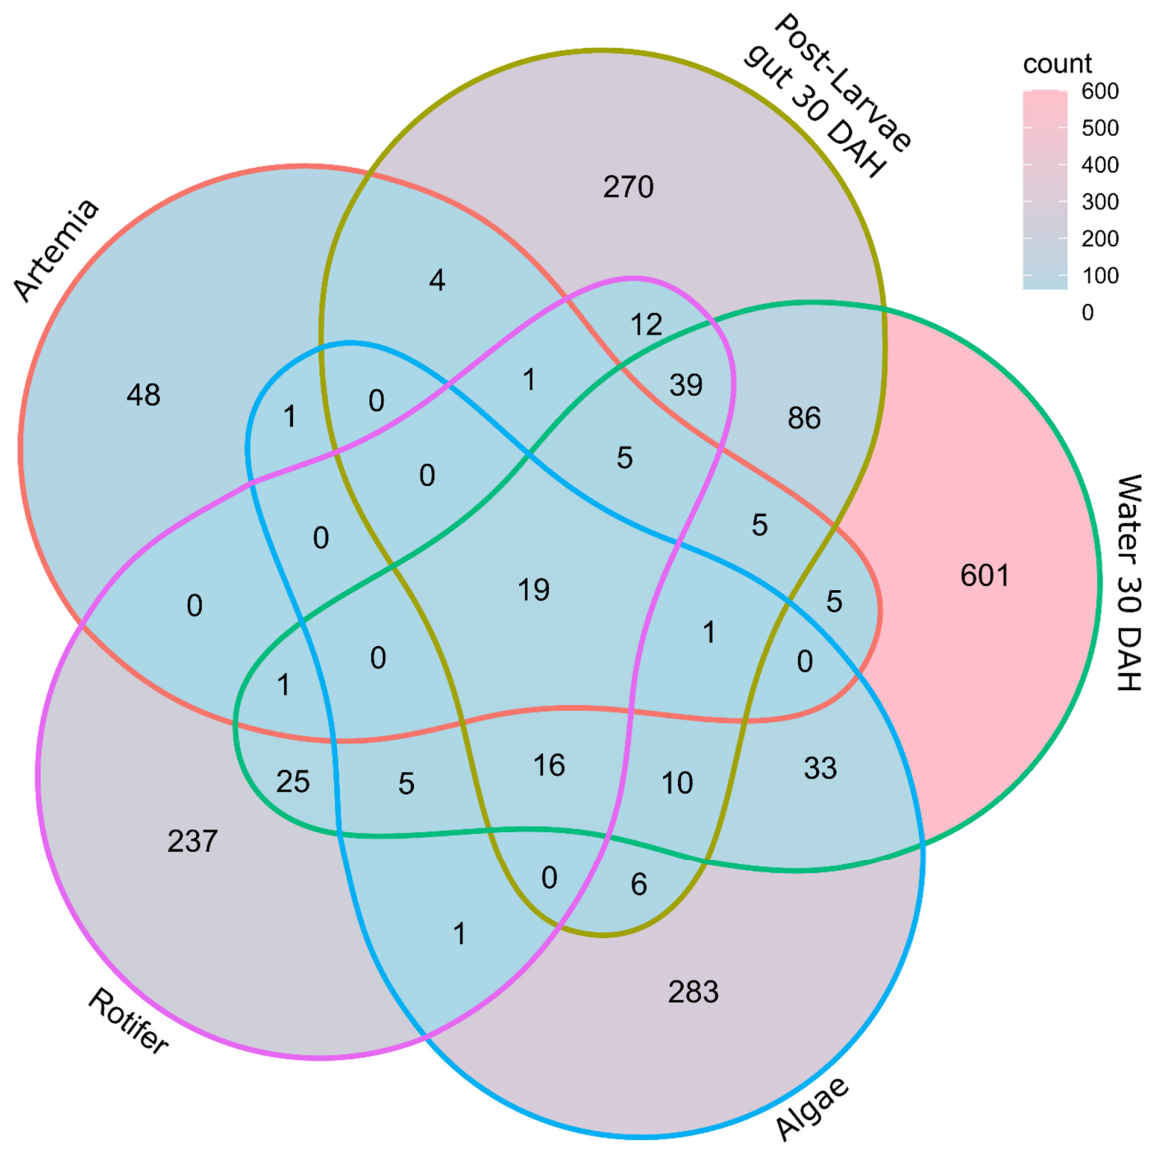

Supplementary Figure S2 - Venn diagram of whole larvae at 10DAH (Larvae), post-larvae gut at 30 DAH (Post-larvae gut), feed samples (Artemia, Rotifer and Algae) and water samples (Water) at 10 and 30 DAH, irrespective of diet.

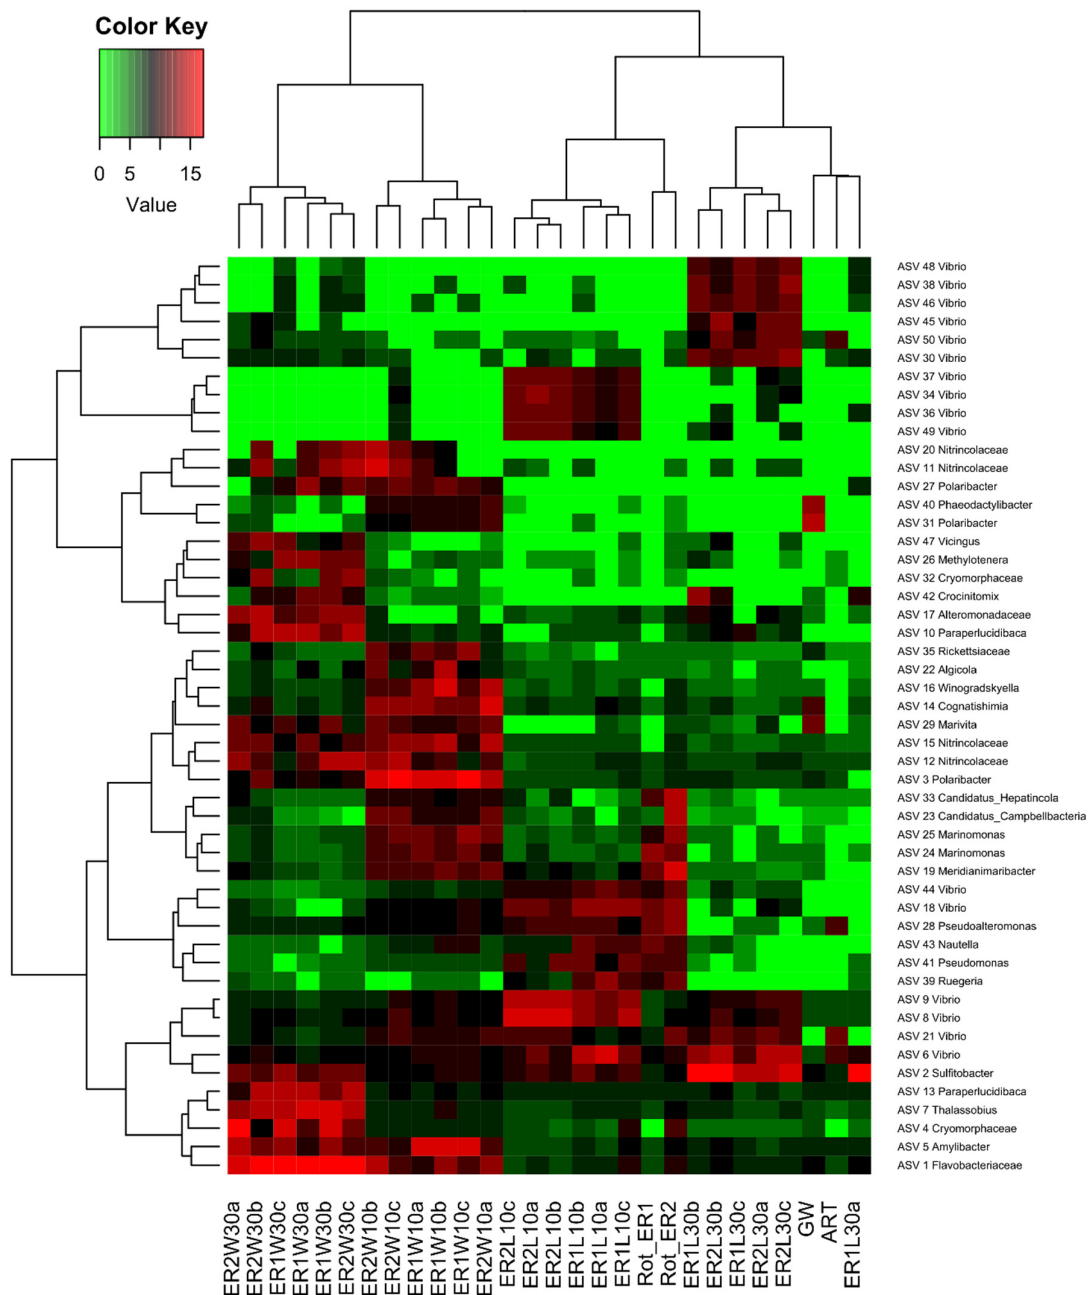

Supplementary Figure S3 - Heatmap analysis of the 50 most abundant ASVs. ASVs are represented by respective numbering (Supplementary Table S2) and the most conclusive taxonomic affiliation. ER1 and ER2 corresponds to the different rotifers diets. ART (Artemia at 30 DAH); GW (Algae at 10 DAH); Rot (Rotifers); ER1L10 and ER2L10 (whole larvae at 10 DAH); ER1L30 and ER2L30 (post-larvae gut at 30 DAH); ER1W10 and ER2W10 (rearing water at 10DAH); ER1W30 and ER2W30 (rearing water at 30 DAH). Small letters indicate tank-replicates.

Supplementary Table S1 - Detailed description of the 50 most abundant ASVs. Sim.: Sequence similarity; Ref: Reference.

| Affiliation base SILVA based classifier |        |                   |                          |                                       | Sequence Similarity on NCBI RefSeq database using BLAST (Altschul et al., 1990)                                                                                         |                                                  |         |                                                                                                                                    |                                                                                         |
|-----------------------------------------|--------|-------------------|--------------------------|---------------------------------------|-------------------------------------------------------------------------------------------------------------------------------------------------------------------------|--------------------------------------------------|---------|------------------------------------------------------------------------------------------------------------------------------------|-----------------------------------------------------------------------------------------|
| ASV                                     | ASV Nº | Family            | Genus                    | Species                               | Closest relatives                                                                                                                                                       | Acc. Nº                                          | Sim.(%) | Source                                                                                                                             | Ref                                                                                     |
| f068d1b23ce6707fc7b98827e7c03943        | 1      | Flavobacteriaceae | Unclassified             | Unclassified                          | <i>Tenacibaculum aestuariivivum</i> JDTF-79<br><i>Tenacibaculum ovolyticum</i> NBRC 15947<br><i>Polaribacter dokdonensis</i> DSW-5<br><i>Tenacibaculum aiptasiae</i> a4 | NR_159126<br>NR_113826<br>NR_043456<br>NR_044202 | 97.16   | Tidal flat;<br>Atlantic Halibut eggs ( <i>Hippoglossus hippoglossus</i> )<br>Seawater;<br>Sea anemone<br><i>Aiptasia pulchella</i> | (Hansen et al., 1992;<br>Park et al., 2017;<br>Wang et al., 2008;<br>Yoon et al., 2006) |
| c115905e9fcddb82a523014b244586e9        | 2      | Rhodobacteraceae  | <i>Sulfitobacter</i>     | Unclassified                          | <i>Sulfitobacter profundus</i> SAORIC-263<br><i>Sulfitobacter marinus</i> SW-265<br><i>Sulfitobacter indolifex</i> DSM 14862                                            | NR_165714<br>NR_043936<br>NR_115898              | 97.76   | Deep sea seawater;<br>Seawater;<br>Seawater                                                                                        | (Song et al., 2019;<br>Wagner-Döbler et al., 2004; Yoon et al., 2007)                   |
| c1c435c1a7911f20fbb7c0c15bb3d407        | 3      | Flavobacteriaceae | <i>Polaribacter</i>      | Unclassified                          | <i>Polaribacter dokdonensis</i> DSW-5                                                                                                                                   | NR_043456                                        | 98.82   | Seawater                                                                                                                           | (Yoon et al., 2006)                                                                     |
| 9da32dfb58ea8ef0a1ccee05ecf0b4b7        | 4      | Cryomorphaceae    | uncultured               | Unclassified                          | <i>Phaeocystidibacter marisrubri</i> G18                                                                                                                                | NR_136475                                        | 90.8    | Marine Sediment                                                                                                                    | (Zheng et al., 2015)                                                                    |
| e688e029724fdd9cd096df2c443740          | 5      | Rhodobacteraceae  | <i>Amylibacter</i>       | Unclassified                          | <i>Amylibacter ulvae</i> KMM 6515                                                                                                                                       | NR_146351                                        | 100     | Green alga <i>Ulva fenestrata</i>                                                                                                  | (Nedashkovskaya et al., 2016)                                                           |
| a2c61bfd131f18c4fd375410fc0049f4        | 6      | Vibrionaceae      | <i>Vibrio</i>            | Unclassified                          | <i>Vibrio anguillarum</i> NBRC 13266                                                                                                                                    | NR_113609                                        | 100     | Ulcerous lesion in cod ( <i>Gadus morhua</i> )                                                                                     | (Thompson et al., 2011)                                                                 |
| 25865e882d21e0aa6fffa300375fc3ac        | 7      | Rhodobacteraceae  | <i>Thalassobius</i>      | <i>Thalassobius mediterraneus</i>     | <i>Thalassobius mediterraneus</i> XSM19                                                                                                                                 | NR_042377                                        | 99.25   | Seawater                                                                                                                           | (Arahal et al., 2005)                                                                   |
| 4a5ef3b18f362cc8c3d5ea749ca7831e        | 8      | Vibrionaceae      | <i>Vibrio</i>            | Unclassified                          | <i>Vibrio lentus</i> CIP 107166                                                                                                                                         | NR_114982                                        | 100     | Oyster ( <i>Crassostrea gigas</i> )                                                                                                | (Macián et al., 2001)                                                                   |
| 6d66f24ce1ac56865b36295b131385f5        | 9      | Vibrionaceae      | <i>Vibrio</i>            | Unclassified                          | <i>Vibrio cyclitrophicus</i> LMG 21359                                                                                                                                  | NR_115806                                        | 100     | Creosote-contaminated marine sediments                                                                                             | (Hedlund and Staley, 2001)                                                              |
| 4a43c52c99691294c452ec83619d039e        | 10     | Moraxellaceae     | <i>Paraperlucidibaca</i> | <i>Paraperlucidibaca baekdonensis</i> | <i>Paraperlucidibaca baekdonensis</i> RL-2                                                                                                                              | NR_117543                                        | 99.53   | Seawater                                                                                                                           | (Oh et al., 2011)                                                                       |
| 9de3ab2c6c64ff335830f8a250d1e710        | 11     | Nitrospiraceae    | uncultured               | uncultured bacterium                  | <i>Amphritea ceti</i> RA1                                                                                                                                               | NR_133961                                        | 92.76   | Beluga whale ( <i>Delphinapterus leucas</i> ) faeces                                                                               | (Kim et al., 2014)                                                                      |

|                                  |    |                             |                             |                                       |                                                                                                                                                                                    |                                                               |       |                                                                                                                                              |                                                                                                                            |
|----------------------------------|----|-----------------------------|-----------------------------|---------------------------------------|------------------------------------------------------------------------------------------------------------------------------------------------------------------------------------|---------------------------------------------------------------|-------|----------------------------------------------------------------------------------------------------------------------------------------------|----------------------------------------------------------------------------------------------------------------------------|
| 56e48910168e7044dff111da2e51d2d4 | 12 | Nitrincolaceae              | uncultured                  | uncultured bacterium                  | <i>Amphritea ceti</i> RA1                                                                                                                                                          | NR_133961                                                     | 92.99 | Beluga whale ( <i>Delphinapterus leucas</i> ) faeces                                                                                         | (Kim et al., 2014)                                                                                                         |
| 6afe589b6e0e15c66643b36ede16c14b | 13 | Moraxellaceae               | <i>Paraperlucidibaca</i>    | <i>Paraperlucidibaca baekdonensis</i> | <i>Paraperlucidibaca baekdonensis</i> RL-2                                                                                                                                         | NR_117543                                                     | 100   | Seawater                                                                                                                                     | (Oh et al., 2011)                                                                                                          |
| c0de2aca9d901a366c09c136da891332 | 14 | Rhodobacteraceae            | <i>Cognatishimia</i>        | uncultured bacterium                  | <i>Celeribacter ethanolicus</i> NH195<br><i>Celeribacter baekdonensis</i> L-6                                                                                                      | NR_146678<br>NR_117908                                        | 98.26 | Seawater                                                                                                                                     | (Lee et al., 2012; Shu-Ling et al., 2016)                                                                                  |
| 1bef2c8662671b4d49e4d6877cb116cc | 15 | Nitrincolaceae              | uncultured                  | uncultured bacterium                  | <i>Marinobacterium boryeongense</i> DMHB-2                                                                                                                                         | NR_171449                                                     | 93.21 | Seawater                                                                                                                                     | (Kang et al., 2019)                                                                                                        |
| b794c29434fdd47d21f1ea42c9f09e1e | 16 | Flavobacteriaceae           | <i>Winogradskyella</i>      | Unclassified                          | <i>Winogradskyella echinorum</i> KMM 6211                                                                                                                                          | NR_044564                                                     | 98.82 | Sea urchins                                                                                                                                  | (Nedashkovskaya et al., 2009)                                                                                              |
| 6907fa7b6a720b79b874a2127027e858 | 17 | Alteromonadaceae            | Unclassified                | Unclassified                          | <i>Moraxella oblonga</i> IAM 14971                                                                                                                                                 | NR_112188                                                     | 87.18 | Oral cavity of sheep                                                                                                                         | (Xie and Yokota, 2005)                                                                                                     |
| c2c6067d787e7e87047ff0a20673bdcd | 18 | Vibrionaceae                | <i>Vibrio</i>               | <i>Vibrio diazotrophicus</i>          | <i>Vibrio diazotrophicus</i> NS<br><i>Vibrio plantisponsor</i> MSSRF60                                                                                                             | NR_026123<br>NR_108600                                        | 100   | Sea urchin gastrointestinal tract<br>Mangrove                                                                                                | (Rameshkumar et al., 2011; Ruimy et al., 1994)                                                                             |
| 7843e3c8f3cb59b0c63b1337733ad7a6 | 19 | Flavobacteriaceae           | <i>Meridianimaribacter</i>  | Unclassified                          | <i>Gaetbulibacter jejuensis</i> CNURIC014<br><i>Meridianimaribacter flavus</i> NH57N                                                                                               | NR_116705<br>NR_116617                                        | 99.76 | Seawater<br>Marine sediment                                                                                                                  | (Oh et al., 2010; Wang et al., 2010)                                                                                       |
| 9d06939aa0a80b5a3bd483f4ec563d9f | 20 | Nitrincolaceae              | uncultured                  | uncultured bacterium                  | <i>Amphritea ceti</i> RA1                                                                                                                                                          | NR_133961                                                     | 92.76 | Beluga whale ( <i>Delphinapterus leucas</i> ) faeces                                                                                         | (Kim et al., 2014)                                                                                                         |
| 8b4e1dd8ce89f7406fe32819e1f336b6 | 21 | Vibrionaceae                | <i>Vibrio</i>               | Unclassified                          | <i>Vibrio hyugaensis</i> 090810a<br><i>Vibrio alginolyticus</i> ATCC 17749<br><i>Vibrio natriegens</i> DSM 759<br><i>Vibrio galathea</i> S2757<br><i>Vibrio harveyi</i> NBRC 15634 | NR_145569<br>NR_044825<br>NR_117890<br>NR_147758<br>NR_113784 | 100   | Seawater<br>Spoiled horse mackerel<br>Marine sponge <i>Scleritoderma cyanea</i><br>Mussel<br>Luminescing amphipod ( <i>Talorchestia</i> sp.) | (Hoffmann et al., 2012; Urbanczyk et al., 2015)<br>(Giubergia et al., 2016; Hoffmann et al., 2012; Urbanczyk et al., 2013) |
| 7fc64535448fdd7bd6f0ffa1de3edfec | 22 | Pseudoalteromonadaceae      | <i>Algicola</i>             | <i>Algicola bacteriolytica</i>        | <i>Algicola bacteriolytica</i> E8R                                                                                                                                                 | NR_036838                                                     | 99.3  | <i>Laminaria japonica</i> with red-spot disease                                                                                              | (Sawabe et al., 1998)                                                                                                      |
| 564c9a3544155ce4ac6b88052911bb23 | 23 | <i>Ca.</i> Campbellbacteria | <i>Ca.</i> Campbellbacteria | uncultured bacterium                  | <i>Parasynecococcus marenigrum</i> WH 8102                                                                                                                                         | NR_176791                                                     | 75.12 | Seawater                                                                                                                                     | (Palenik et al., 2003)                                                                                                     |
| f563a708667c398dd5983fe8e08f064f | 24 | Marinomonadaceae            | <i>Marinomonas</i>          | uncultured bacterium                  | <i>Maribrevibacterium harenarium</i> HB171799                                                                                                                                      | NR_173646                                                     | 97.89 | Coastal sand                                                                                                                                 | (Mo et al., 2021)                                                                                                          |

|                                  |    |                        |                          |                                  |                                                                                                                                                |                                     |       |                                                                     |                                                                    |
|----------------------------------|----|------------------------|--------------------------|----------------------------------|------------------------------------------------------------------------------------------------------------------------------------------------|-------------------------------------|-------|---------------------------------------------------------------------|--------------------------------------------------------------------|
| 1802662da29b8dfbdd7ccdd08a1df57b | 25 | Marinomonadaceae       | <i>Marinomonas</i>       | <i>Marinomonas</i> sp.           | <i>Marinomonas pontica</i> 46-16                                                                                                               | NR_042965                           | 99.06 | Seawater                                                            | (Ivanova et al., 2005)                                             |
| 99d50e0cd2405dd20e8a463874db4716 | 26 | Methylophilaceae       | <i>Methylothenera</i>    | uncultured beta                  | <i>Methylothenera oryzisoli</i> La3113                                                                                                         | NR_175447                           | 95.78 | Rice rhizosphere and soil                                           | (Lv et al., 2018)                                                  |
| 01f97950da8ddf76d1e2fe4b006b6c9  | 27 | Flavobacteriaceae      | <i>Polaribacter</i>      | Unclassified                     | <i>Polaribacter dokdonensis</i> DSW-5                                                                                                          | NR_043456                           | 99.05 | Seawater                                                            | (Yoon et al., 2006)                                                |
| 3dfb3c6cbb1c5b7e6290532430050d0e | 28 | Pseudoalteromonadaceae | <i>Pseudoalteromonas</i> | Unclassified                     | <i>Pseudoalteromonas gelatinilytica</i> NH153<br><i>Pseudoalteromonas arabiensis</i> k53<br><i>Pseudoalteromonas mariniglutinos</i> a KMM 3635 | NR_152003<br>NR_113220<br>NR_028992 | 100   | Seawater<br>Marine sediment<br>diatom <i>Chaetoceros lauderi</i>    | (Matsuyama et al., 2013; Romanenko et al., 2003; Yan et al., 2016) |
| ddd6a46dc8af7661b360f3f9c33da991 | 29 | Rhodobacteraceae       | <i>Marivita</i>          | Unclassified                     | <i>Marivita roseacus</i> CB1052<br><i>Marivita cryptomonadis</i> CL-SK44<br><i>Marivita litorea</i> CL-JM1                                     | NR_132662<br>NR_044514<br>NR_044513 | 100   | Estuary<br>Phytoplankton <i>Cryptomonas</i> sp.<br>Coastal seawater | (Budinoﬀ et al., 2011; Hwang et al., 2009)                         |
| 425de3fa772e20f85bc482817841792e | 30 | Vibrionaceae           | <i>Vibrio</i>            | Unclassified                     | <i>Vibrio gigantis</i> LGP 13                                                                                                                  | NR_044079                           | 99.77 | Oysters ( <i>Crassostrea gigas</i> ) haemolymph                     | (Le Roux et al., 2005)                                             |
| 3dff1372f8aca1f92d0fc968cd797cf  | 31 | Flavobacteriaceae      | <i>Polaribacter</i>      | Unclassified                     | <i>Polaribacter dokdonensis</i> DSW-5                                                                                                          | NR_043456                           | 99.53 | Seawater                                                            | (Yoon et al., 2006)                                                |
| 624953349a47e0a2972534803c3dbb1b | 32 | Cryomorphaceae         | uncultured               | uncultured<br><i>Owenweeksia</i> | <i>Vicingus serpentipes</i> ANORD5                                                                                                             | NR_159281                           | 90.76 | Epilithic biofilm marine                                            | (Wiese et al., 2018)                                               |
| 074446dfe202a77ff094742b2f978f73 | 33 | Ca.Hepatincola         | Ca.Hepatincola           | <i>Cherax quadricarinatus</i>    | <i>Pseudaminobacter granuli</i> Gr-2                                                                                                           | NR_165691                           | 83.33 | Wastewater treatment plant                                          | (Hahn et al., 2017)                                                |
| a34cdfc67699ad0b7b9141389684639a | 34 | Vibrionaceae           | <i>Vibrio</i>            | Unclassified                     | <i>Vibrio lentus</i> CIP 107166<br><i>Vibrio splendidus</i> LMG 4042                                                                           | NR_114982<br>NR_042156              | 99.77 | Oyster ( <i>Crassostrea gigas</i> )                                 | (Le Roux et al., 2004; Macián et al., 2001)                        |
| b634bed192f76a84fddd0bfc9b72f8d  | 35 | Rickettsiaceae         | uncultured               | metagenome                       | <i>Orientia tsutsugamushi</i> Karp<br><i>Orientia chuto</i> str. Dubai                                                                         | NR_025860<br>NR_117903              | 90.07 | Human infected                                                      | (Derrick and Brown, 1949; Izzard et al., 2010)                     |
| 1f2946719ed27a9967dfbe65deb7f3eb | 36 | Vibrionaceae           | <i>Vibrio</i>            | Unclassified                     | <i>Vibrio cyclitrophicus</i> LMG 21359                                                                                                         | NR_115806                           | 99.77 | Creosote-contaminated marine sediments                              | (Hedlund and Staley, 2001)                                         |
| 5d81207da0d0a7234a8b1ab7bc7e15b4 | 37 | Vibrionaceae           | <i>Vibrio</i>            | Unclassified                     | <i>Vibrio lentus</i> CIP 107166                                                                                                                | NR_114982                           | 99.77 | Oyster ( <i>Crassostrea gigas</i> )                                 | (Macián et al., 2001)                                              |

|                                  |    |                   |                           |                                       |                                            |           |       |                                                                  |                                          |
|----------------------------------|----|-------------------|---------------------------|---------------------------------------|--------------------------------------------|-----------|-------|------------------------------------------------------------------|------------------------------------------|
| 2751464a7b61ed160db5fa53bf800056 | 38 | Vibrionaceae      | <i>Vibrio</i>             | Unclassified                          | <i>Vibrio toranzoniae</i> Vb 10.8          | NR_117680 | 99.53 | Clams ( <i>Venerupis philippinarum</i> and <i>V. decussata</i> ) | (Lasa et al., 2013)                      |
| 386c723a1301c09364f5283533e33ba4 | 39 | Rhodobacteraceae  | <i>Ruegeria</i>           | Unclassified                          | <i>Ruegeria arenilitoris</i> G-M8          | NR_109635 | 99.75 | Coastal sand near seaweed farm                                   | (Park and Yoon, 2012)                    |
| 9cc02ddcf035ba6736436e7418bc84de | 40 | Saprospiraceae    | <i>Phaeodactylibacter</i> | <i>Phaeodactylibacter xiamenensis</i> | <i>Phaeodactylibacter xiamenensis</i> KD52 | NR_134132 | 99.76 | Marine algae <i>Phaeodactylum tricornutum</i>                    | (Chen et al., 2014)                      |
| 52d9269c1a06765708b14aa1343cf02d | 41 | Pseudomonadaceae  | <i>Pseudomonas</i>        | <i>Pseudomonas oleovorans</i>         | <i>Pseudomonas khazarica</i> TBZ2          | NR_169334 | 99.77 | Sediments Caspian Sea                                            | (Tarhriz et al., 2020)                   |
| 5735128e79ecd7e544dbc404550f1e27 | 42 | Crocinitomicaceae | <i>Crocinitomix</i>       | uncultured Crocinitomix               | <i>Crocinitomix algicola</i> 0182          | NR_158097 | 94.08 | Marine algae <i>Gracilaria blodgettii</i>                        | (Shi et al., 2017)                       |
| 762c63c2523466e5c18168ed06a73211 | 43 | Rhodobacteraceae  | <i>Nautella</i>           | Unclassified                          | <i>Phaeobacter italicus</i> LMG 24365      | NR_042673 | 100   | Biofilm on cathode immersed in seawater                          | (Vandecandelaere et al., 2009)           |
| a50c49d26c83479691d4d1e9d9055d46 | 44 | Vibrionaceae      | <i>Vibrio</i>             | Unclassified                          | <i>Vibrio parahaemolyticus</i> ATCC 17802  | NR_117893 | 99.3  | Shirasu food poisoned victim                                     | (Fujino et al., 1974; Yang et al., 2015) |
| 4f7891e3f49e6a1603df14f964fe4889 | 45 | Vibrionaceae      | <i>Vibrio</i>             | <i>Vibrio fortis</i>                  | <i>Vibrio fortis</i> CAIM 629              | NR_025575 | 100   | Shrimp larvae ( <i>Litopenaeus vannamei</i> )                    | (Thompson et al., 2003a)                 |
| 1a9301a03c70f53dc126bbf6b1aada9e | 46 | Vibrionaceae      | <i>Vibrio</i>             | Unclassified                          | <i>Vibrio gigantis</i> LGP 13              | NR_044079 | 99.77 | Oysters ( <i>Crassostrea gigas</i> ) haemolymph                  | (Le Roux et al., 2005)                   |
| 43a5e3686c50b190009288f80a42646a | 47 | Cryomorphaceae    | <i>Vicingus</i>           | uncultured bacterium                  | <i>Acidiluteibacter ferriformacis</i> S-15 | NR_174308 | 94.34 | Mangrove near port environment                                   | (Gui et al., 2020)                       |
| e126d0d3db2858c647557595da6b24e9 | 48 | Vibrionaceae      | <i>Vibrio</i>             | Unclassified                          | <i>Vibrio gigantis</i> LGP 13              | NR_044079 | 99.53 | Oysters ( <i>Crassostrea gigas</i> ) haemolymph                  | (Le Roux et al., 2005)                   |
| 946f1b3bf75d231e55cd9294801a6c41 | 49 | Vibrionaceae      | <i>Vibrio</i>             | Unclassified                          | <i>Vibrio kanaloae</i> LMG 20539           | NR_042468 | 100   | Diseased oyster larvae ( <i>Ostrea edulis</i> )                  | (Thompson et al., 2003b)                 |
| 8ac510326bc676a42e83bb237a1386ab | 50 | Vibrionaceae      | <i>Vibrio</i>             | Unclassified                          | <i>Vibrio parahaemolyticus</i> ATCC 17802  | NR_117893 | 99.3  | Shirasu food poisoned victim                                     | (Fujino et al., 1974; Yang et al., 2015) |
