# Supplementary material for: Assessing the Effects of Rotifer Feed Enrichments on Turbot (Scophthalmus maximus) Larvae and Post-Larvae Gut-Associated Bacterial Communities
Source: MDPI journal article supplement (doi:10.3390/microorganisms11020520), 2023-02-17
Supplement: s1 [file s1]

# Assessing the Effects of Rotifer Feed Enrichments on Turbot (*Scophthalmus maximus*) Larvae and Post-Larvae Gut-Associated Bacterial Communities

Antonio Louvado<sup>1</sup>, Carolina Castro<sup>2</sup>, Davide A. M. Silva<sup>1</sup>, Vanessa Oliveira<sup>1</sup>, Luís E. C. Conceição<sup>3</sup>, Daniel F. R. Cleary<sup>1</sup> and Newton C. M. Gomes<sup>1\*</sup>

<sup>1</sup>Department of Biology and Centre for Environmental and Marine Studies (CESAM), University of Aveiro, 3810-193 Aveiro, Portugal

<sup>2</sup>Flatlantic—Actividades Piscícolas, SA 3070-732 Praia de Mira, Portugal

<sup>3</sup>SPAROS Lda., 8700-221 Olhao Portugal

Email: gomesncm@ua.pt

## List of representative sequences of deleted ASVs

>0058a381e13c111622df567cc7af962f

tgaggaatattggacaatgagggaaaccttgatcctacgatactgcgtgaatgaatgaagactctttgagttgtaaaattctttcattaaggaag  
ataatgacgttacttaaaaaagaagttccggctaactccgtgccagcagccggtgaagacggagggaactagtggtattcgggaataactgggc  
gtaaagggtatgtaggcggtttattaagtttaggtgaaagtttaaagcttaactttaaaattattttaaaatacttttaaacttgagtttaatagagg  
ataatggaatttttagtgtagaaataaaatttgaatatataaaaggaactccagaagcgaaggcgattatctggattaacactgacgctgaggt  
acgaaaggatggggagcaacca

>00963ec1f216fdf2e4d47372061ec17e

tggggaattttccgcaatggggcgaagcctgacggagcaatgccgcgtggaggtagaaggccacgggtcatgaacttctttccgggagaaga  
agcaatgacgggtatctggggaataagcatcggtactctgtgccagcagccggtgaataacagaggatgcaagcgttatccggaatgattggg  
cgtaaagcgtctgtaggtggcttttaagtcggtcgaatccagggctcaactctggacagggcgtggaaactaccaagctggagtacggta  
ggggcagagggaatttccggtggagcgggtgaaatgcgtagagatcggaagaacaccaacggcgaaagcactctgctgggcccgaactgaca  
ctgagagacgaaagctaggggagcgaatgggattagataccctgt

>011a4a80f145da3138a59a20262629c4

aaacaagctgtaaacacaacattgacatatcgtcactttccgaagttataaaaaacttctgtagcctaatacagctagtggtgatttttagttcttat  
gagaactttttggaacaacagcgtctgctgtgtccaacaatgatatcgatgagagccaggagagcgaacaaaaatcaatacatttgctggcca  
gaaaagcaaaatgaagggtgacgaaagatccacgtgatctattgtctatctgatctgccaatgaagatgt

>0198b2c0e198373d78e1237c3a42d248

taaggaatattgggcaatggaggcaactctgaccagccatgccgcgtgaaggatgacggccctatgggttgtaaaacttctttatacgggaata  
aaccgggtacgtgtaccggctgaatgtaccgtaagaataaggatcggtactccgtgccagcagccggtgaatacggaggatccaagcg  
ttatccggtattcattgggtttaaagggtgcgtagggcgtattgtgaagtcagcggtgaaatcctacagcttaactgtagaactgccgttgatactgc  
aagcttgagtacatttgatgtggcggaatgtgtcatgtagcggtgaaatgcttagatatgacacggaacaccgattgcgaaggcagctcaca  
aaactgtaactgacgctgaggcacgacgctggggatcaaca

>01c17cc458e8abbc102b808e45ffa54

tgaggaatattgcacaatgggggaaacccgtgatgcagcaacgccgcgtggaggattgacggtctttggattgtaaaactcctttctgtgggacga  
gcgaggacggtaccacaggaatcagtcacggctaactacgtgccagcagccggtgaatacgtaggtggcgagcgttatccggaataactggg  
cgtaaagcgaagcagggcgtcgttaagttgacgtaaaatctcctggcttaactgggaggggtcgttgagactggcgagcttgaggcgatg

agaggggcatggaattcccggtgtagtggtggaatgcgtagagatcgggaggaacaccagaggcgaaagcggtgccctggcattggcctgac  
gctcatgtgcgaaagcgtggggagcgaacg

>01f2b94783ffc09866d2d8bd4d14d8a3

tggggaatattggacaatgggcgcaagcctgatccagcaatgccgctgggtgaagacggctctcggattgtaaagccctttaggcggggagg  
aacgtcgtcgtgcgaacagtgccgcatctgacgttaccgcagaataagcaccggctaactccgtgccagcagccgcggtaatcggagggt  
gcgagcgttaatcggaattactgggcgtaaagcgtgcgtaggcggatgggtcagtcagccgtgaaagccccgggctaacctgggaacggcgg  
ttgagacggccctctcgagtggttagaggatcgtggaattccgggtgtagcggtgaaatgcgtagagatccggaggaacaccgatggcgaa  
ggcagcgtatcggggccacactgacgtgaggcacgaaagcgtggggagcaaacg

>0238e0e03ffd3faa629954545d336e61

taaggaatattggtcaatggacgaaagtctgaaccagccatcccgcgtgcaggatgactgccctatgggttgtaaactgcttttagtagagaaga  
aacgcagtcatttatgattgcctgacggtacctacagaataagcaccggctaactccgtgccagcagccgcggtaatcggagggtgcgagcgt  
tatccggaatcactgggtttaaagggtgcgtaggcggggaattaagtcagtggtgaaatcttgcgcttaacgataaaattgccattgatactgat  
tttcttgattgggttagggttagcggaatgtgacatgtagcggtgaaatgcatagatatgtcatggaacaccaattgcgaaggcagctagctgg  
gccttgattgacgtgaggcacgaaagcgtgggttagcgaaca

>02880bca12c185a77358ab268fc9d74a

tggggaatatttgacaatgggcgcaagcctgatccagcaatgccgctgcgggaagaaggccttcgggttgtaaaccgcttttggcaggaacga  
aacgggtgccgtaataaccgggcgctaatagacggtacctgcagaataagcaccggctaactacgtgccagcagccgcggtaatcgtagggtg  
cgagcgttaatcggaattactgggcgtaaagcgtgcgagcggttggtgaagacaggcgtgaaatccccgggctaacctgggaatggcgctt  
gtgactgcacggctggagtgcggcagagggggatggaattccgcgtgtagcagtgaaatgcgtagatatgcggaggaacaccgatggcgaa  
gcaatcccctgggcctgactgacgtcatgcacgaaagcgtggggagcaaacg

>02f91d244dc4a89c804a57e3a4a2012b

tagggaatcttcgcaatggacgaaagtctgacggagcaacgccgctgtatgaagaaggccttcgggttgtaaagtactttcagtcgtgagga  
aggcatttgcttaataagcgttaagtgttgacgttagcgacagaagaagcaccggctaactccgtgccagcagccgcggtaatcggagggtgc  
gagcgttaatcggaattactgggcgtaaagcgcagtcagtggttcgttaagtcagatgtgaaagccccgggctaacctcggaattgcatttga  
aactggcggactagagtctgtagagggggtagaatttcaggtgtagcggtgaaatgcgtagagatctgaaggaataccggtggcgaaaggcg  
gccccctggacagacactgacactcagatgcgaaagcgtggggagcaaacg

>031470c2d1c07877ef85cc2b5b3b3ba3

tgaggaatattccgcaatgggcgaaagcctgacggagcaataccgcgtggaggatgacggcctgtgggtcttaaactcctttttagagaaga  
agttctgacggtatctaaggaataagcatcggctaactccgtgccagcagccgcggtaatcgggggatgcaagcgttatccggaatgattggg  
cgtaaagcgtctgtaggtggctttcaagtaactgtcaaaaatcagggttaaccttgagccggcagttgaaactatgaagcttaggttaggta  
ggggcagagggaattcctagtgtagcggtgaaatgcgtagatattaggaagaacaccaatcgcaagcactctgctgggccatgactgacac  
tgagagacgaaagctaggggagcgaatgggattagataccccgtagt

>032acccb1c0145513294dfd19d8ad7e9

ttaggaatattccacaatgggcgaaagcctgatggagcaatgccgctgcaggatgaaggccttagggttgtaaactgctttatagcgaagaa  
tatgacggtaacgtatgaataaggatcggctaactccgtgccagcagccggtcatagggagatccaagcgttatccgatttactgggctga  
aagagttgcgtaggtggttaatttaagtgaatagtgaatcttggctcaaccataaggctattattcaaaactgagatacttgagaatgagagag  
gtcactggaattccctgtgtaggagtgaatccgtagatataggagggaacaccaatggcgtaggcaggtgactggctatttctgacactgag  
gcacgaaagcgtggggagcgaacg

>039aa10851da48633b422764ba7a8659

tggggaatattggacaatgggcgcaagcctgatccagccatgccgctgtgtgaagaaggccttttggttgtaaagcactttaagcgaggagga  
ggctacttgattaataactctaggatagtgacgttactcgagaataagcaccggctaactctgtgccagcagccggttaatacagagggtgc  
gagcgtaatcggatttactgggcgtaaagcgtgcgtaggcggcttcttaagtcggatgtgaaatccctgagcttaacttaggaattgcattcgat  
actgggaagctagatattgggagaggatggtagaattccaggtgtagcggtgaaatcgctagagatctggaggaataccgatggcggaaggca  
gccatctggcctaatactgacgtgaggtacgaaagcatggggagcaaaca

>03b6ba062eff1aacc8b3fe788054afa0

tagggaatcttcgcaatgggcgaaagcctgacggagcaacgccgctgagtgatgaaggtcttcggatcgtaaaactctgttattaggaaga  
acaaatgtgaagtaactatgcacgtcttgacggtaacctacagaagccacggctaactacgtgccagcagccggttaatacgtagggtgc  
aagcgttatccggaattattgggcgtaaagcgcgctaggcgggttttaagtctgatgtgaaagcccacggctcaaccgtggagggtcattgga  
aactggaaaacttgagtgcagaagaggaaagtggaaattccatgtgtagcggtgaaatgcgcagagatatggaggaacaccagtggcggaaggc  
gactttctggtctgtaactgacgtgatgtgcgaaagcgtggggatcaaacaggattagataccctggtag

>03c6444fe94266556629f3c77d76d543

ccaccttacctacgggggctgcagtgaggaattttccgcaatgggcgaaagcctgacggagcaataccgctggaggatgacggcctgtgggt  
cttaaactcctttcttagagaagaagttctgacggtatctaaggaataagcatcggctaactccgtgccagcagccggttaatacgggggatg  
caagcggtatccggaatgattgggcgtaaagcgtctgtaggtggctttcaagtcaactgtcaaaaatcagggcttaaccttgacggcgagttg  
aaactatgaagcttgagttaggtaggggcagagggaattcctagtgtagcggtgaaatgcgtagatattaggaagaacaccaatcg

>03d13d566b47a0b83fd1cd1294416e57

taaggaatattggtcaatggacgaaagtctgaaccagccatgccgctggaggatgaaggtcctctggattgtaaactcttttatatgggacga  
aaaaagggttttctaactcgtctgacggtaccatatgaataagcaccggctaactccgtgccagcagccggttaatacggagggtgcaagcgt  
tatccggtactcgggtttaaagggtgcgtaggtgggttggttaagtcagtggtgaaatctccgagcttaacttgaaactgccattgatactatc  
agtcttgaatattgtggaggtcagcggaatatgtcatgtagcggtgaaatgcttagatatgacatagaacaccaattgcgaaggcagctggctac  
acatctattgacactgaggcacgaaagcgtggggatcaaaca

>03d8671072e521e192d538f851889518

tggggaatcttcgcaatgggcgaaagcctgacggagcaatctcgtgtgagggattagttctcgtgagggacggaaagtctacggattgtaaacc  
tctttttcagggaggaatacaatgacgtgtatctgaagaataagcatcggctaactccgtgccagcagccggttaagacggaggatgcaagt  
gttatccggaattattgggcgtaaagcgtttaggttggttaataagtcattgttaactttgaagcttaacttcaaaattgcaatcgaaactat  
tagactagagtatagtaagggttaacaggaattttcagtgaggcggtgaaatgtgtagatattgaaaggaacatcagtggcgaaagcgtttact  
agggttaactgacactcagaaactaaagctaggggagcaaatg

>03d8ff08c34d9401cd05db90944cc4f5

tcgagaatcattcgcaatgggcgaaagcctgacgatgcgacgccgtgtgagcgatgaaggccttagggctgtaaagctcttcgcttggaaca  
agagaagctagttaatacctagctaatttaggggtaccaggtaaagaagcaccggctaactccgtgccagcagctgcggttaatacggagggtg  
caagcattaatcggatttattgggcgtaaaggcgctaggctggtttgtaagtcagatgtgaaatccggggctcaacctcggaacagcatatg  
aaactacatacctagagggtagaaggagaaaacggaattccacaagtagcggtgaaatgcgtagatatgtggaagaacaccggtggcgaagg  
cggttttctattttattcctgacgtgaggcgcgaaagcaaggggatcaaaca

>040c3e2578ae8716f5f66274b670f9a2

tggggaatattgcacaatgggggaaaccctgatgcagccatgccgctgtgtgaagaaggccttcgggttgtaaagcactttcagttgtgagga  
aaggttagtagttaataactgtagctgtgacgttagcaacagaagaaggaccggctaactccgtgccagcagccggttaatacgggggatg  
caagcggtatccggaatgattgggcgtaaagcgtctgtaggtggctttcaagtcgccgtcaaatccagggctcaacctggacaggcgggtg  
aaactaccaagctggagtacggtaggggcagagggaatttcgggtggagcggtgaaatgcattgagatcggaagaacaccaacggcgaaa  
gcactctgctgggccgacactgacactgagagacgaaagctaggggagcaaatg

>049abd9f0f9a0d26b4205dbad6e7ed89

ttaggaatattcgtcaatggaggaaactctgaacgagcaatgccgcgtgagtgatgaaggtcttatagattgtaaaactctgttgatggaaaa  
acgactaggttaggaaatgaacttagtgatggtaccataccagaaagccccggctaactacgtgccagcagccgcggtatactaggggg  
caagcgttatccggattattgggcgtaaagcgtgtgtaggcggtttattaagttaagattaaagccccgggctcaactccggttaagtcttaaa  
actgtagacttgagtacggttagaggcaaacggaatttctagtgtagcggtgaaatgcgtagatattagaaggaacaccagtggcgaaagcgg  
tttctgggccgttactgacgtgaggcacgaaagcgtggggagcaaata

>04b0f4595a4859b9ca2619890f26cb74

tggggaatcttcgcaatgggcgaaagcctgacggagcaatgccgcgtggaggtagaaggcccacgggtcatgaactcttttccgggagaaga  
agcaatgacggtatctggggaataagcatcggtactctgtgccagcagccgcggtatacagaggatgcaagcgttatccggaatgattggg  
cgtaaagcgtctgtaggtggccttttaagtcgcggtcaaatccagggtcaactctggacagcggtggaaactaccaagtggagtacggt  
ggggcagagggaatttccggtggagcggtgaaatgcgtagagatcggaagaacaccaacggcgaaagcactctgctgggcccagactgaca  
ctgagggacgaaagctaggggagcgaatg

>04be702b895fe5ed0568344daf564276

tagggaatcttcgcaatgggcgaaagcctgacggagcaacgccgcgtgagtgatgaaggtcttcggatcgtaaaactctgttattaggaaga  
acatatgtgaagtaactgtgcacatcttgacggtacctaatacagaaagccacggctaactacgtgccagcagccgcggtatactaggtggc  
aagcgttatccggaattattgggcgtaaagcgcgctgtaggcggtttttaagtctgagtgaagcccacggctcaaccgtggagggtcattgga  
aactggaaaacttgagtgcagaagaggaaagtgaattccatgtgtagcggtgaaatgcgcagagatatggaggaaacaccagtggcgaaaggc  
gactttctggtctgtaactgacgctgatgtgcgaaagcgtggggatcaaaca

>063ec35700f6d12e12c9dda2991550e1

tggggaatcttcgcaatgggcgaaagcctgacgcagcaacgccgcgtgagggtgaaggccctcggtcgtaaacgctttcgacagggaag  
aaaatgacggtacctgtagaagaagccccggccaactacgtgccagcagccgcggtatactagggggcgagcgttgcggattattggg  
cgtaaagagctcgtaggcggttaactaagtcagatgtgaaaactcagggcctaactctgagcctgcatttgatactggttgactagagtcaagt  
aggggagtggtgaattccagtgtagcggtgaaatgcgcagatatgggaggaaacaccagcagcgaaggcggcactctgggcttgactgacg  
ctgaggagcgaaagcatgggtagcaaaca

>06f8df735f9242b4613f84c5c6cbab5c

tggggaatattgcgcaatgggcgaaagcctgacgcagcagcagccgcgtgagggtgacggtcttcggattgtaaacctctttcagcagggaag  
aattgacggtacctgcagaagaagcaccggctaactacgtgccagcagccgcggtatactaggggtgcaagcgttgcggattattgggcg  
taaagagctcgtaggcggtttgtcgcgtcggtgtgaaacccaaggcttaaccttgggcctgcattcgatacgggcagactagaggatggcag  
gggaaactggaattcctggtgtagcggtggaatgcgcagatatcaggaggaaacaccggtggcgaaggcggtttctgggccattactgacgctg  
aggagcgaaagcgtggggagcaaaca

>073e48b2f66e03194e0f964f0686864f

tagggaatcttcgcaatggacgaaagtctgacggagcaacgccgcgtgtatgaagaaggttttcggatcgtaaaagtactgtttagagaaga  
acaaggataagagtaactgcttgccttgacggtatctaaccagaaagccacggctaactacgtgccagcagccgcggtatactaggtggc  
aagcgttgcggaattactgggcgtaaagcgcgctgtaggcggtggtcagttgggggtgaaatcccagggttaacctcggaactgccttca  
atactgccagctctgagatcggaagaggtgagtggaattcctagtgtagaggtgaaattcatagatattaggaagaacaccagtggcgaaaggc  
gctcactggtccgatactgacgctgaggtgcgaaagcgtggggagcgaaca

>075d92a9826e0ac375cd0d532f68499f

tggggaatcttcgcaatgggcgaaagcctgacgcagcaatgccgcgtgagggaagaaggtcttaggattgtaaacctctttcagcagggaag  
aaaacagacggtacctgcagaagaagccccggctaactacgtgccagcagccgcggtatactagggggcgagcgttgcgggaatcattgg  
gcgtaaagagcgtgtaggcggtggaaggtctggtgtgaaagccccgggctcaaccccgagggtcaccggaacccgacagtcttgagtccg  
gaagaggagagtggaattcctggtgtagcggtggaatgcgcagatatcaggaggaaacccaatggcgaaggcagctcttggtacgtgactga  
cgctgagacgcgaaagcgtggggagcgaaca

>0760e3bc01b20d91c54587bcd8064543

tggggaatccccgcaatgggcgaaagcctgacggagcaatgccgcgtggaggtggaaggcctacgggtcgtaacttcttctcggagaaga  
aacaatgacggtatctgaggaataagcatcggtactctgtgccagcggccggtgaagacagaggatgcaagcggtatccggaatgattgg  
gcgtaaagcgtctgtaggtggctttcaagtcgccgtcaaataccagggtcaaccctggacaggcgggtgaaactaccaagctggagtagcgg  
taggggcagagggaatccccggtggagcggtgaaatgcattgagatcggaagaacaccaacggcgaaagcactctgctgggccgacactga  
cactgagagacgaaagctaggggagcaaatg

>07c3160551922faa7be5740ea3adc189

tggggaatccccgcaatgggggcaaccctgatccagcaatgccgcgtgtgtgaagaaggccttcgggtgtaaagcacttttgcggaaaga  
aatcgcaacttactaatattaggtgtggatgacggtaaccggaagaataaggaccggctaactacgtgccagcagccggttaatacgtagggtcc  
aagcgtaatacggaaactactgggcgtaaagcgtgcgcaggcgggtgtgcaagaccgatgtgaaatccccgggcttaacctgggaattgcattggt  
gactgcacggctagagtgtgcagagggggtagaattccacgtgtagcagtgaaatgcgtagagatgtggaggaataccgatggcgaaggca  
gccccctgggataacactgacgctcatgcacgaaagcgtggggagcaaca

>08b5edd3f9f582d34a2f26eb8fa5819d

tggggaatccccgcaatgggcgaaagcctgacggagcaatgccgcgtggaggtggaaggcctacgggtcgtaacttctttctcggagaaga  
aacaatgacggtatctgaggaataagcatcggtactctgtgccagcagccggtgaagacagaggatgcaagcggtatccggaatgattgg  
gcgtaaagcgtctgtaggtggctttcaagtcgccgtcaaataccagggtcaaccctggacaggcgggtgaaactaccaagctggagtagcgg  
taggggcagagggaatccccggtggagcggtgaaatgcattgagatcgtaaagaacaccaacggcgaaagcactctgctgggccgacactga  
actgagagacgaaagctaggggagcaaatg

>090a919b28608a194dfe6738a8a3fda5

tggggaatccccgcaatgggcgaaagcctgacggagcaatgccgcgtggaggtggaaggcctacaggtcgtaacttctttctcggagaaga  
aacaatgacggtatctgaggaataagcattggctaactctgtgccagcagccggtgaagacagaggatgcaagcggtatccggaatgattgg  
gcgtaaagcgtctgtaggtggctttcaagtcgccgtcaaataccagggtcaaccctggacaggcgggtgaaactaccaagctggagtagt  
gtaggggcagagggaatccccggtggagcggtgaaatgcattgagatcggaagaacaccaacggcgaaagcactctgctgggccgacactg  
aactgagagacgaaagctaggggagcaaatg

>09206a00841a5c45ee6369cdc14800b0

tggggaatccccgcaatgggcgaaagcctgacggagcaatgccgcgtggaggtggaaggcctacgggtcgtaacttctttctcggagaaga  
aacaatgacggtatctgaggaataagcatcggtactctgtgccagcagccggtgaagacagaggatgcaagcggtatccggaatgattgg  
gcgtaaagcgtctgtaggtggctttcaagtcgccgtcaaataccagggtcaaccctggacaggcgggtgaaactaccaagctggagtagcgg  
taggggcagagggaatccccggtggagcggtgaaatgcattgagatcggaagaacaccaacggcgaaagcactctgctgggccgacactga  
cactgagagacgaaagctaggggagcaaatgggattagataccctggtagt

>0a1582d42cf13d17b5c34eb87d9edf8a

tggggaatattgcacaatggaggaaactctgatgcagcaacgccgcgtggaggatgacacatttcggtgcgtaaactccttttatatgggaagat  
aatgacggtaccatataaataagcaccggctaactccgtgccagcagccggtgaatacggagggtgcgagcggtatccggaatcattgggtt  
aaagggttcgtagcgggtcaataagtcagaggtgaaatcttcagcttaactgtaaaatggccttgatactgttgaccttgaattactgtgaag  
tggttagaatatgtagttagcggtagaatgcttagagattacatagaataccgattgcgaaggcagatcactaatagtagtattgacgctgatga  
acgaaagcgtgggtagcgaacg

>0a1f5ed70dcb37a86924dbd5fde981af

tggggaatattggacaatgggggcaaccctgatccagccatgccgcgtgtgtgaagaaggccttttggttgaagcactttaagcaggaggga  
gaggctaattggttaataccattagattagcgttaacctgcagaataagcaccggctaactctgtgccagcagccggtgaatacagagggtgc  
gagcgtaatacggaaactactgggcgtaaagcgagtgtaggtggctcattaagtcacatgtgaaatccccgggcttaacctgggaactgcatgtga

tactgggtgctagaatatgtgagagggaagtagaattccaggtgtagcggtgaaatgcgtagagatctggaggaataccgatggcgaaggc  
agcttcctggcataatattgacactgagattcgaaagcgtgggtagcaaca

>0a60c01d1b75bb107d1aa0e919e048b6

tggggaatccccgcaatggggcgaagcctgacggagcaataccgcgtgagggatgacggcctatgggttgtaaacctcttttcagggagga  
ataaatgacgtgtacctgaagaataagcatcggctaactccgtgccagcagccgcggtgaagacggaggatgcaagtgttatccggaatcactg  
ggcgtaaagcgtctgtaggtgggttaataagcaactgttaaatcttgaggctcaacctcaaaatcgagtcgaaactattagactagagtatagt  
aggggttaaagggaatttccagtgagcggtgaaatgcgtagatattggaaggaacaccgatggcgaaggcactttactgggctattactaaca  
ctcagagacgaaagctagggtagcaaatg

>0a7a72cf0cbf9f815d62c85dfa0b269a

tggggaatcttagacaatgggggaaaccctgatctagccatgccgcgtgatcgatgaaggccttagggttgtaaagatctttcagatgggaaga  
taatgacgggtaccatcagaagaagccccggctaactccgtgccagcagccgcggtgaatacggaggggtagcggttattcggaaattactggcg  
taaagcgacgtagcggtatcagaagtcagaggtgaaatcccagggctcaaccttggaactgccttgaaactcctggtcttgaggtcgagag  
aggtgagtggaattccgagtgtagaggtgaaattcgtagatattcggaggaacaccagtggcgaaggcggctcactggctcgatactgacgctg  
aggtgcgaaagcgtggggagcaaca

>0bea95fe73cab86e2f8520bd5095878f

tgaggaatccccgcaatggggcgaagcctgacggagcaataccgcgtggaggatgacggcctgtgggtcttaaactcctttcttagagaaga  
agttctgacgggtatctaaggaataagcatcggctaactccgtgccagcagccgcggtgaatacgggggtagcaagcgttatccggaatgattggg  
cgtaaagcgtctgtaggtggctttcaagtcaactgtcaaaaatcagggcttaaccttgagccggcagttgaaactatgaagcttgagttaggtg  
ggggcagaggggaattcctagtgtagcggtgaaatgcgtagatattaggaagaacaccaatcgcaagcactctgctgggcatgactgacac  
tgagagacgaaagctaggggagcgaatgggattagataccccagtag

>0cf3a2c867b5632992f47d06a363fa6e

tagggaatcttcacaatggacgcaagtctgatggagcaacgccgcgtgagtgaagaaggttttcggatcgtaaagctctgttgggtgaaga  
aggatagaggtagtaactggcctttatttgacggtaatcaaccagaaagtcacggctaactacgtgccagcagccgcggtgaatacgtaggtggc  
aagcgttgcggatttattggcgtaaagcgagcgagcggaatgataagtctgatgtgaaagccacggctcaacctggaaactgcatcgg  
aaactgtcattcttgagtgcaagaggagagtggaactccatgtgtagcggtggaatgcgtagatatatggaagaacaccagtggcgaaggc  
ggctctctggtctgcaactgacgctgaggctcgaaagcatgggtagcgaaca

>0d60e090dd8bc66c7a72007827a11981

tggggaatcttgacaatggggcgaagcctgatccagcaatgccgcgtgcaggatgaaggccttcgggttgtaaactgcttttgacggaacga  
aacggttctttctaataaagagagctaatagacggtaaccgtaagaataagcaccggctaactacgtgccagcagccgcggtgaatacgtaggtgc  
aagcgttaatcggaattactggcgtaaagcgtgcgcaggcggttatgaagacagttgtgaaatccccgggctcaacctgggaattgcatctgt  
gactgcatagctagagtacggtagagggggatggaattccgcgtgtagcagtgaaatgcgtagatatgaggaggaacaccgatggcgaagc  
aatcccctggacctgtactgacgctcatgcagaaagcgtggggagcaaca

>0ee0776f049d07206e50c7bf26ea15e2

taaggaatattggacaatggccgcaaggctgatccagcatccagcgtgcaggaagaaggccctatgggttgtaaactgctttatcagggaat  
aaacctctggattcactccggagctgaaggtaacctgaagaataagcaccggctaactccgtgccagcagccgcggtgaatacggagggcgag  
cggttatccggaattactgggtttaaagggtgcgtaggcggtttgtaagtcaggagtgaaagtttgcggctcaaccgtaaaattgcttctgatact  
gcatggctagaattaggtagaggtcagcggaatgtggcatgtagcggtgaaatgcatagatatgccatagaacaccaattgcgaaggcagctg  
gctagacctggattgacgctgaggcacgaaagcgtggggagcgaaca

>0ee9aeb8bb3ebbccdb9cfefb3afa610a

tagggaatcttccgaatggacgaaagtctgacggagcaacgccgctgtatgaagaaggttttcggatcgtaaagtactgtttagagaaga  
acaaggataagagtaactgttgccttgacggatctaaccagaaagccacggctaactacgtgccagcagccgcggtatacgtaggtggc  
aagcgttgcggattatttgggcgtaaagcgcgcgaggcggtcttttaagtctgatgtgaaagccccggcttaaccggggagggtcattgga  
aact

>0f56078109a37d2c8d5d5fb471f699e8

tggggaatattggacaatgggcgaaagcctgatccagccatgccgctgtgtgaagaaggtcttcggattgtaaagcactttaagttgggagga  
agggtttagcttaatacgtgcaaccttgacgttaccaacagaataagcaccggctaactctgtgccagcagccgcggtatacagagggtgc  
aagcgttaatcggaattactgggcgtaaagcgcgctaggtggcaagtaagatgggtgtgaaatccccgggctcaacctgggaactgcatcc  
ataactgcttcgtagagtacggtagagggtagtggaatttctgtgtagcggtgaaatgcgtagatataggaaggaaacaccagtggcgaaggc  
gactacctggactgatactgacactgaggtgcgaaagcgtggggagcaaaca

>101637aba474a6614786486ad42acb11

tagggaatcttcggaatggacggaagtctgaccgagcaacgccgctgagtgaagaaggttttcggatcgtaaagctctgttgaagagaaga  
acgagtgtagagtggaagtacactgtgacggatcttaccagaaagggacggctaactacgtgccagcagccgcggtatacgtaggtcc  
cgagcgttgcggattatttgggcgtaaagcgagcgaggcggttagataagtctgaagttaaaggctgtggcctaaccatagtagccttgg  
aactgtttaacttgagtgaagaggggagagtggaattccatgtgtagcggtgaaatgcgtagatatatggaggaacaccggtggcgaaagcg  
gctctctggcttgaactgacgtgaggctcgaaagcgtggggagcaaaca

>10dcede07fbb5f3a7a229d97beae316e

tggggaattttccgaatgggcgaaagcctgacggagcaatgccgctggagggtggaaggcctacgggtcgtaacttcttttctcgagaaga  
aacaatgacggatttttaggaataagcatcggttaactctgtgccagcagccgcggtaaagacagaggatgcaagcgttatccggaatgattgg  
gcgtaaagcgtctgtaggtggctttcaagtcgccgtcaaatcccagggtcaacctggacaggcggtggaactaccaagctggagtacgg  
taggggcagagggaatttccggtggagcggtgaaatgcattgagatcggaagaacaccaacggcgaaagcactctgtgggccgacactga  
cactgagagacgaaagctaggggagcaaatg

>11a1aed0371e3bdfb03d87bdb449a4c4

tggggaatcttgacaatgggcgaaagcccgatccagcaatatcgctgagtgaagaagggcaatgccgctgtaaagctcttctcgtcagtgcc  
gcgatcatgacaggactcgaggaagaagtcgggctaactccgtgccagcagccgcggtaaagacggggggggcaagtgttcttcggaatgact  
gggcgtaaagggcacgtaggcggtgaatcggttgaaagttaaagtcgcaaaaactgggtggaatgctctcgaaaccaattcacttgagttag  
acagaggagagtgggaatttctgtgttaggggtgaaatccgcagatctacgaaggaacgcaaaaagcgaaggcagctctctgggtccctaccga  
cgctggagtgcgaaagcatggggagcgaacg

>120540d18ed88a6b75d9f796dce95beb

tagggaatcttccgaatggacgaaagtctgacggagcaacgccgctgtatgaagaaggttttcggatcgtaaagtactgtttagagaaga  
acaaggataagagtaactgttgccttgacggatctaaccagaaagccacggctaactacgtgccagcagccgcggtatacgtaggtggc  
aagcgttgcggattatttgggcgtaaagcgcgcgaggcggtcttttaagtctgatgtgaaagccccggcttaaccggggagggtcattgga  
aactggaagactggagtgcagaagaggagagtgggaattccacgtgtagcggtgaaatgcgtagatatcgggaggaacaccagtggcgaaggc  
ggcctcctggaccaagactgacgtgaggtgcgaaagcgtggggagcaaaca

>123b5897f78e93e51758e1a210ec6a85

tagggaatcttccgaatggacgaaagtctgacggagcaacgccgctgtatgaagaaggttttcggatcgtaaagtactgtttagagaaga  
acaaggataagagtaactgttgccttgacggatctaaccagaaagccacggctaactccgtgccagcagccgcggtatacggagggtgc  
aagcgttaatcggaattactgggcgtaaagcgcgctaggtggcgttgaagtgcgatgtgaaatccccgggctcaacctgggaactgattcg  
atactggctggtagagtgtgtagagggaagtgggaattccaggtgtagcggtgaaatgcgtagatatcgggggaacatcagtggcgaaggc  
ggcttctggaccaacactgacgtgaggcgcgaaagcgtggggagcaaaca

>128854112a231f5cd34bceb6b0446ca9

tggggaatattgcgcaatgggcgaaagcctgacgcagcgacccgctgagggatgaaggccttcgggttgtaaactctttcagcagggacg  
aagcgaaagtgcggtacctgcagaagaagcaccggctaactacgtgccagcagccggttaatacgtaggggtgaagcgtgtccgattta  
ttgggcgtaaagagctcgttaggcggctgtcgcgtcggtatgtgaaaacttggggctcaaccctgagcttgattcgatacgggcagactagagg  
atggcaggggagactggaactcctggtgtagcgggtggaatgcgcagatatcaggaagaacaccggtggcgaaggcgggtctctgggccattac  
tgacgctgaggagcgaaagcgtggggagcaaaca

>12d6b1ac93111f354e16a73df44f9fce

taaggaatattggacaatggaggcaactctgatccagccatgccgctgaaggattaaggccctatgggttgtaaactcttttagacgggacaa  
aaccctttacgtgtaaagggttgatggtactgtcagaataagcatcggctaactcgtgccagcagccggttaatacgaaggatgaagcgtt  
atccggaattattgggtttaaagggtgcgttagcggactaataagtcagtggtgaaagcctgcagcttaactgcagaattgccgttgatactgtta  
gtcttgagtacagttgaggtaggcgggaatgtgtcatgtagcggtgaaatgcttagatatgacacagaacaccgattgcgaaggcagcttgctaa  
gctgtaactgacgctgaggcacgaaagcgtggggagcaaaca

>12da874e4a73d0a98c1ea0a23957bd44

tggggaatattggacaatgggcgaaagcctgatccagccatgccgctgagtgatgaaggcttcggatcgtaaagctctgtgggaagggacg  
aaaaagcctaactaatacgttaggtcttgacggtaccttcttagcaagcaccggctaactccgtgccagcagccggttaatacggagggtgc  
aaacgttgctcggaattattgggcgtaaagcgacgtaggcgggtccgctaagtccggtatgtgaaagccctcggcttaaccgaggaagtgcacg  
aaactgacgggctagagtacggaagagggtttcggaattccggtgtagagggtgaaattcgtagatatcgggaggaacaccagtgggcgaaggc  
ggaaacctgggcgatactgacgctgaggtgcgaaagcgtggggagcaaaca

>13008322aeaf6d05249ad9682125b366

tggggaatattgcacaatgggcgcaagcctgatgcagccatgccgctgtgtgaagaaggccttcgggttgtaaagcactttcagtcgtgagga  
agggtgtagtgtaatagcactatcatttgacgttagcgacagaagaagcaccggctaactccgtgccagcagccggttaatacggagggtgc  
gagcgttaatcggaattactgggcgtaaagcgcatgcaggtggtttgttaagtcagatgtgaaagcccggggtcctaacctcggaattgcatttga  
aactggcagactagagtactgtagaggggggtagaatttcaggtgtagcgggtgaaatgcgtagagatctgaaggaataccggtggcgaaaggcg  
gccccctggacagatactgacactcagatgcgaaagcgtggggagcaaaca

>135b1d618f7e68209c8d7e135e4b43b9

taaggaatattggtcaatggacggaagtctgaaccagccatcccgcgtgcaggatgaaggctcctatggattgtaaactgcttttagcagagacg  
aagacctatcatttatgatggagtacggtatctgcggaataagcaccggctaactccgtgccagcagccggttaatacggagggtgcaagc  
gttatccggaatcactgggtttaaagggtgcgttaggcggagaattaagtcagtggtgaaatcctgtcgcttaacgatagaactgccattgatact  
gattttctgaattgggttgaggttagcggaatgtgacatgtagcggtgaaatgcatagatatgtcatggaacaccaattgcgaaggcagctaac  
tgggccttgattgacgctgaggcacgaaagcgtgggtagcgaaca

>13a5db768c0e55c55824b0d5980fbf90

tcgagaatcttcggcaatgggggaaaccctgaccgagcgacgccgctgcgggatgaaggccttcgggttgtaaaccgctgtcgtaagggaac  
aaatctatgagggtactctctcatagttgagtatcttaggaggaaggacgggctaagttcgtgccagcagccggttaagacgaaccgtccga  
acgttattcggtatcactgggcttaaagagttcgttaggcggcccgacaggtgaggtgtgaaatccctcggctcaaccgaggaattgcgcttcaa  
ccgtcaggcttgaggagatagaggtgagcggaacagatggtggagcggtgaaatgcgttgatatcatctggaacaccggtggcgaaagcgg  
ctcactggatcttttctgacgctgaggaacgaaagctagggtagcgaacg

>14a7f75d4fa5795e78aec05501b5d4c1

tggggaatattgcgcaatgggcgaaagcctgacgcagccacgccgctgtgtgatgaaggccttcgggttgtaaagcactgtcgggagggacg  
aagaaatgacggtacctccaagaaagcaccggctaaccctgtgccagcagccggttaatacaggggtgcaagcgtgtcgggaatcactg  
ggcgtaaagcgtacgagcggaaccgttaagtcggatgtgaaagcccggggtcctaacccggaacggcattcgaaactggcggtcttgaatac  
gggagaggtgaattggaattcctggtgtagaggtgaaattcgtagatatcaggaggaacatcgggtggcgaaagcgggttactggcccgatattga  
cgctcatgtacgaaagcgtggggagcaaaca



>15e409cec6365290b44b6ac6c6aad668

tggggaatattggacaatggggggaaccctgatccagccatgccgctgtgtgaagaaggccttttggttgtaaagcactttaagcgaggagga  
ggctacctagattaatactttaggatatgtggacgttactcgagaataagcaccggctaactctgtgccagcagccggttaatacagagggtg  
cgagcgttaatcggatttactgggcgtaaagcgtgcgtagggcgccaattaagtcaaatgtgaaatccccgagcttaacttgggaattgcattcg  
atactggttggttagagtatgggagaggatggtagaattccagggtgtagcggtgaaatcgtagagatctggaggaataccgatggcgaaggc  
agccatctggcctaatactgacgctgaggtacgaaagcatggggagcaaca

>168c7040965c754f79d642c92f79809f

tagggaatccccgcaatggggcgaagcctgacggagcaatgccgctggagggtgaaggcctattgggttgtaactcctttccagagaaga  
aacctgacggtatctggggaataagcatcggttaactcgtgccagcagccggttaatacgggggatgcaagcgttatccggaattattgggc  
gtaaagagtccttaggttggtatcaaagcctattgttaatatcaaggcttcaccttgaatctgcagtaggaacctgataacttgagtgcggtagg  
agtagggggaattcccggtgtagcggtgaaatcgtagatatcggaagaacaccggaggcgaaagcgccctactaggccgacactgacact  
aagggacgaaagctaggggagcaaacg

>19a9e24a3794be248d52e98ec10e1c6b

tggggaatattggacaatggggcgaagcctgatccagccatgccgctgagtgatgacggccttaggggttgtaaagctctttcaacggtgaagat  
aatgacggttaaccgtagaagaagccccggctaacttcgtgccagcagccggttaatacgaagggggctagcgttggtcgaattactgggcgt  
aaagcgacgtagggcgatacttaagttaggggtgaaatcccagggtcaacctcggaactgccttgatactgggtatctcagtagtggtaga  
ggtaagtggaaactccgagtgtagaggtgaaatcgtagatatcggaagaacaccagtgcggaaggcggttactggaccattactgacgctga  
ggtgcgaaagcgtggggagcaaca

>19b7c685c65baea7222e6b58c5ec2469

tgagggaatattggacaatgagctaacgcttgatccagcaatactacgtgggtgatgaaggctaatttagttgtaaaacccttttacagtacgat  
aatgacggttagctgtagaataagccccggcaaatttcgtgccagcagccggttatacagagggggctagtggtattcaaaattattgggcgt  
aagggtacgtaggtggaaaaacaagttaaaaatcaaatttaggcttaaccttaatatagttttaataactattttctagagtaaagtagagga  
tagtagaatttctaataacgatggaatgtttatatattagaaggaataccgtagcgaaggcagctatctggacttatactgacactgaggtac  
gaaagcataagtagcaaatg

>1a24c2a441deac742f6c047eb37d5887

tagggaatcttcgcaatgggacgaaagctgacggagcaacgccgctgtatgaagaaggttttcggatcgtaaagtactgttgtagagaaga  
acaaggataagagtaactgttgccttgacggtatctaaccagaaagccacggctaactacgtgccagcagccggttaatacggaggggtgc  
aagcgttatccggaatcactgggtttaaagggtgcgttaggcggcgctataagtcagaggtgaaaggccaccgcttaacggtgggactgccttg  
atactgtagtgtgaatcaggttgaggtcggcggaatgtgacatgtagcggtgaaatgcttagatatgtcatagaacaccaattcggaaggcag  
ctggctagaccttgattgacgctgaggcacgaaagcgtggggagcgaaca

>1a2ba4587ee37d8984eab739d1445c19

tggggaatccccgcaatggggcgaagcctgacggagcaatgccgctggagggtggaaggcctacgggtcgtcaacttcttttctcggaaga  
aacaatgacggtatctgaggaataagcatcggttaactctgtgccagcagccggttaagacagaggatgcaagcgttatccggaatgattgg  
gcgtaaagcgtctgtaggtggctttcaagtcggcggtcaaatcccagggtcaacctggacaggcggtggaaactactaagctggagtacgg  
taggggcagaggggaattccggtggagcggtgaaatgcattgagatcggaagaacaccaacggcgaaagcactctgctgggcccacactga  
cactgagagacgaaagctaggggagcaaatg

>1a48aa666133ff5cf4bcabe1fb2830c1

tggggaatattgcacaatggggcgaagcctgatgcagcgacgccgctgagggtgacggccttcgggttgtaaactctttcgaccctgacga  
agcgtgagtgacggttagggggagaagaagcaccggccaactacgtgccagcagccggttaagacgtaggggtcgagcgttgccggattat  
tgggcgtaaagagctcgttaggcggctcgtcgctgcacgtgaaaacttggggcttaaccctaagcttcggttgatacgggctgggctagagttc

ggtaggggagactggaattcctggtgtagcggtgaaatgcgagatatcaggaggaacaccggtggcgaaggcgggtctctgggccgatactg  
acgctgaggagcgaaagcgtggggagcgaaca

>1b404f71123067723c2fa8772ff67647

tgaggaatattgggcaatggaggcaactctgaccagccatgcccggtgcaggaagactgccctatgggttgtaaactgctttatacaggaag  
aaacagttctacgtgtagaaccttgacggtactgtaagaataaggaccggctaactccgtgccagcagccggttaatacgggggatgcaagc  
gttatccggaatgattgggcgtaaaagcgtctgtaggtggctttcaagtccgccgtcaaataccagggtcaaccctggacaggcgggtgaaact  
accaagctggagtacggttaggggagagggaatttccggtggagcggtgaaatgcattgagatcggaagaacaccaacggcgaaagcactc  
tgtgggccgacactgacactgagagacgaaagctaggggagcaaatg

>1be4852d442a272814aaef6d6f981e99

ccaccttacctacggggggctgcagtgaggaatttccgcaatgggcgaaagcctgacggagcaataccgctggaggatgacggcctgtgggt  
cttaaactcctttcttagagaagaagtctgacggtatctaaggaataagcatcggctaactccgtgccagcagccggttaatacgggggatg  
caagcgttatccggaatgattgggcgtaaaagcgtctgtaggtggctttcaagtcaactgtcaaaaatcagggttaaccttgagcc

>1c1cf920678e035ad553becf12c8205a

tgaggaatttctgcaatgggcgaaagcctgacagagcaatatcgctgagggaggaaggcctacgggttgtaaactcttttctcaaggagga  
aactatgacgttacttgaggaataagcatcggctaaccctgtgccagcagccggttaatacaggggatgcaagtgttatccggaatcattggg  
cgtaaaagcgtctgcaggctggcttttaagtctttgttaaagttctaggctcaacctagaaaatgcaaaggaaactaaaagccttgagtatggtag  
aggtaaagggaatttccagtggagcagtgaaatgcttagatattggaaagaacaccaacggcggaaggcactttactgggccagcactgacgt  
gagagacgaaagctaggggagcaaacg

>1d69806f9c912f325cc581d0b5d122b8

tggggaatttggacaatgggggcaaccctgatccagccatgcccggtgagtgagaaggccttcgggttgtaaagctctttcggcggggaaga  
aatcgcatctcctaatacggggtgtggatgacggtaccgaataagaagcaccggctaactacgtgccagcagccggttaatacgtagggtgc  
gagcgttaatcggaattactgggcgtaaaagcgtgcgagcggtttgttaagacagatgtgaaatccccgggtcaacctgggaactgcattgt  
gactgcaaggctagatgtaggaggggggtggaattccacgtgtagcagtgaaatgcgtagagatgtggaggaaacaccgatggcgaaggc  
agccccctgggccaatactgacgctcatgcacgaaagcgtggggagcaaacg

>1d69dd92369c5a1b4620c86f79748f41

tggggaatttccgcaatgggcgaaagcctgacggagcaatgcccggtgaggttagaggctcctgggtcatgaacttctttccggagaagaa  
aaaatgacggtatccggggaataagcatcggctaactctgtgccagcagccggttaagacagaggatgcaagcgttatccggaatgattggg  
cgtaaaagcgtctgtaggtggcttttaagttcgtgtcaaataccagggtcaaccctggacaggtggtgaaaactactaagctagagtacggtg  
ggggcagagggaatttccggtggagcgatgaaatgcgtagagatcggaaggaacaccaacggcgaaagcactctgtgggccgacactgaca  
ctgagagacgaaagctaggggagcgaatg

>1dfe95826824dbd649020bf872431102

tggggaatttctgcaatgggcgaaagcctgacggagcaatgcccggtgaggtggaaggcctacggttcgtcaacttctttctcggaagaa  
acaatgacggtatctgaggaataagcatcggctaactctgtgccagcagccggttaagacagaggatgcaagcgttatccagaatgattggg  
cgtaaaagcgtctgtaggtggctttcaagtccgccgtcaaataccagggtcaaccctggatatgacgaggaactaccaagctggagtacggtg  
ggggcagagggaatttccggtggagcggtgaaatgcattgagatcggaagaacaccaacggtgaaagcactctcggggtcgacactgaca  
ctaagagacgaaagctaggggagcaaatg

>1e2e0b8dc088d288945341e0dde5439a

tggggaatttccgcaatgggcgaaagcctgacggagcaatgcccggtgaggttagaggccctgggtcatgaacttctttccggagaagaa  
aaaatgacggtatccggggaataagcatcggctaactctgtgccagcagccggttaagacagaggatgcaagcgttatccggaatgattggg  
cgtaaaagcgtctgtaggtggcttttaagttcgtgtcaaataccagggtcaaccctggacaggtggtgaaaactactaagctagagtacggtg

ggggcagaggggaatttccggtggagcgatgaaatgcgtagagatcggaaggaacaccaacggcgaaagcactctgctgggccgacactgacac

>1e49ea05196d01db42590d502dd85e3a

tggggaattttggacaatgggcgcaagcctgatccagccatgccgctgcggaagaaggccttcgggttgtaaaccgcttttgcagggaaga  
aaagggttctggctaatacctgggactcatgacgggtacctaagaataagcaccggctaactacgtgccagcagccggttaatacgtagggtgc  
aagcgttaatacggaattactgggcgtaaaagcgtgcgcaggcggttatgcaagacagaggtgaaatccccgggctcaacctgggaactgccttg  
tgactgcattggtagagtacggtagagggggatggaaatccgctgtagcagtgaatgcgtagatatgcggaggaacaccgatggcgaaggc  
aatcccctggacctgtactgacgctcatgcagaaagcgtggggagcaaca

>1ebe0ee8d42dc4f5fe388e894d6c303c

tggggaattttccgcaatgggcgaaagcctgacggagcaatgccgctggaggtagaaggccacgggtcgtgaacttctttccggagaaga  
agcaatgacgggtatctggggaataagcatcggtactctgtgccagcagccggttaatacagaggatgcaagcgttatccggaatgattggg  
cgtaaagcgtctgtaggtggcttttaagtccgctgcaaatccagggtcaactctggacagcggtggaaactaccaagctggagtacggta  
ggggcagaggggaatttccggtggagcggtgaaatgcgtagagatcggaaggaacaccaacggcgaaagcactctgctgggccgacactgaca  
ctgagagacgaaagctaggggagcgaatg

>1f6ca6657f9b8fa43db47a0f67ee8d98

tggggaatcttgacaatgggcgaaagcccgatccagcaatattcgctgggtgaagaagggaattccgcttgtaaagctctttcgtcagtgcg  
cgatcatgacaggactcgaggaagaagccccggctaactccgtgccagcagccggttaagacgggggggcaagtgtattcggaatgacta  
ggcgtaaaggcgacgtagggcggtgaatcggttggaagtgaagtcgcaacaattggcggggtgctttcggaaccaattcacttgagttagat  
aggggagagtggaaatctgtgttagggatcaaatccggagatctacgaaggaacgcaaaagcgaaggcagctctctgggtctacactgacg  
ctggggtgcgaaagcatggggagcaaca

>1fcb66ac70fc87b66052a7c74bf363b3

tggggaatattggacaatgggcgcaagcctgatccagcaataccgctgaatgatgaaggccttcgggttgtaaagttcttttagtaggaagat  
aatgacggtaacctacagaaaaagcaccggctaactctgtgccagcagccggttaatacgaagggtgctagcgttggtcggaatcactggcgct  
aaagcgtgcgtagggcggttgtaagttagttgtgaaagccggggtcaacctcggaattgcagctgaaactacctgtagagtatggttg  
ggatagtagaattcctagttaggggtgaaatccgtagatattaggaggaataccggtggcgaaggcgactatctaagccattactgacgctga  
ggtacgaaagcgtggggagcaaca

>2041b05a2f9eff7bf328119b31c4dd67

tggggaatattggacaatgggcgcaagcctgatccagcaatgccgctgggtgaagacggcctgcgggttgtaaagccctttggcggggagg  
aacggcgtcgcgcaacaggggcggtctgacgttaccgcgaaacaagcaccggctaactccgtgccagcagccggttaatacggagggt  
gcgagcgttaatacggaattactgggcgtaaaagcgtgcgtagggcggtccggtcagtcagccgtgaaagccccgggctcaacctgggaacggcg  
ttgagacggccggactggagtgggctagaggatcgtggaattccgggtgtagcggtgaaatgcgtagagatccggaggaacaccgatggcga  
aggcagcggtctggggccacactgacgctgaggcacgaaagcgtggggagcaaca

>2123fabe9329206256ba554350586bcd

taaggaatattggacaatggacggaagtctgatccagccatgccgctgaaggatgaaggcgtcagcgttgtaaacttctttggatggggac  
aaaccacttcatttatggggtgctgagggtaccatcagaataagcaccggctaactccgtgccagcagccggttaatacggagggtgcaagc  
ttatccggaatcactgggtttaaagggtgcgtagggcggtctgataagttagttgtgaaattcctcggttaaccgagtggactgcgattgatactg  
ttagacttgaatcaggttaggttagcggaatgtgacatgtagcggtgaaatgcttagatatgtcatagaacaccgattgcgaaggcagcttgct  
gggcttcgattgacgctgaggcacgaaagcgtggggagcaaca

>2164e40cb22143f4fb8ebe25ee8bb325

tagggaatcttccgaatggacgaaagtctgacggagcaacgccgctgagtgaagaaggtttccgatcgtaaaactctgtgtcagagaaga  
acaagttggagagtaactgtctcagccttgacggtatctgaccagaaagccacggctaactacgtgccagcagccgcggtatactaggtggc  
aagcgttgcggatttattggcgtaaagcgagcgagcggttccttaagtctgatgtgaaagcccacggctcaaccgtggaaggtcattgga  
aactggggaaacttgagtgcagaagaggagagtggaattccatgtgtagcggtgaaatgcgtagatatatggaggaacaccagtggcgaaggc  
gactctctggtctgtaactgacgtgaggctcgaaagcgtggggagcaaca

>216c57de85aa19814275de7ff3264e1c

tagggaatcttccgaatggacgaaagtctgacggagcaacgccgctgtatgaagaaggccttcgggttgtaaagcactttcagtcgtgagga  
aggtggtagtgttaatagcactatcatttgacgttagcgacagaagaagcaccggctaactccgtgccagcagccgcggtatacggagggtgc  
gagcgttaactcggaattactggcgtaaagcgacgcagcggtttgttaagctagatgtgaaagccccgagctcaacttgggatggtcatttag  
aactggcagactagagtcttgagaggggagtggaattccaggtgtagcggtgaaatgcgtagatatctggaggaacatcagtggcgaaggcg  
actccctggccaaagactgacgtcatgtgcgaaagtgtgggtagcgaaca

>224cd3b2e0e33d8ecd351ab6da333d50

tggggaatattgcacaatggcgcaagcctgatgcagcgacgccgctgagggatggaggccttcgggttgtaaactctttatcggggagca  
agcgtgagtgtgattaccggtgaataagcaccggctaactacgtgccagcagccgcggtatacgtagggtgcaagcgttatccggaattattg  
ggcgtaaagggtcgttaggcggttcgtcgctccggtgtgaaagtcctacggttgatccgcgccgggtacggcggggttgagtgcg  
gtaggggagactggaattccggtgtaacggtggaatgtgtagatatcggaagaacaccaatggcgaaggcaggtctctgggccgtcactga  
cgctgaggagcgaaagcgtggggagcgaaca

>22b156ab488a5a8dfa251815fb0c9b82

tggggaatcttccgaatggcgcaagcctgatgcggagcaatgccgctggaggtagaaggccacgggtcatgaactctttccgggagaaga  
agcaatgacggtatctgggaataagcatcggtactctgtgccagcagccgcggtatacagaggatgcaagcgttatctggaatgattggg  
cgtaaagcgtctgtaggtggcttttaagtcggtcaaatccagggtcaactctggacagcggttgaaactaccaagtggtgagtagcgtgta  
ggggcagagggaatttccggtggagcggtgaaatgcgtagagatcggaagaacaccaacggcgaagcactctgctgggcccagactgaca  
ctgagagacgaaagctaggggagcgaatg

>23d531a8631db66781231820eb3d4a56

tggggaatattggacaatggcgcaagcctgatccagcaatgccgctgagtgtatgaaggccttagggttgtaaagctctttaccgggatgat  
aatgacagtaccgagagaataagccccggctaactccgtgccagcagccgcggtatacggaggggctagcgttattcggaattactgggcg  
taaagcgacgttaggcggtttgtaagttagaggtgaaagcctggagctcaactccagaactgcctttgagactgcatcgcttgaatccaggag  
aggtgagtggaaattccgagtgtagaggtgaaattcgtagatatcggaagaacaccagtggcgaaggcggtcactggactggtattgacgtg  
aggtgcgaaagcgtggggagcaaca

>23f97de539d47efe31dab47adc172bd6

taaggaaatattggtcaatgccggaagggtgaaccagccatgccgctgaaggatgactgccctctgggttgtaaactcttttgatgggacga  
aaaaacgggatttacttgactgacggtaccatcagaataagcaccggctaactccgtgccagcagccgcggtatacggagggtgcaagcg  
ttatccggaatcactgggtttaaagggtgcgtagcggtttataagttaggggtgaaagcatgcagcttaactgtataattgcctttgatactgta  
agacttgaataagggttaggttggcggaatgtgacatgtagcggtgaaatgcttagatatgtcatagaacaccgattgcgaaggcagctgactg  
ggcctttattgacgtgaggcacgaaagcgtggggagcgaaca

>241693a03d133f908cb6af9fe172911a

tggggaatcttgacaatggcgcaagcctgatccagccatgccgctgagtgaagaaggccttagggttgtaaagctctttaccagggacga  
taatgacggtacgtggagaataagccccgcaactctgtgccagcagccgcggtatacgaaggggctagcgttgcgaattactgggcg  
taaagcgacgttagcggttcgttaagttaggggtgaaatcccgagctcaactccggaactgcctttgatactggcgatctagagatcgagag  
aggtgagtggaaattccgagtgtagaggtgaaattcgtagatatcggaagaacaccagtggcgaaggcggtcactggctcgatactgacgtg  
aggtgcgaaagcgtggggagcaaca

>24224733872ea0131e2751d8b554d73c

tgaggaatattgcgcaatggaggaaactctgacgcagccatgccgctgaaggacgactgccctatgggttgtaaactctttgtacgggaata  
aaccttgcctgtagcgaggtgaaggtagcgaataagcaccggctaactccgtgccagcagccggttaatacggagggtgcaagcg  
ttatccggattattgggtttaaagggtccgtaggcggatcgtaagtcagtggtgaaagcccacagctcaactgtggaactgccattgatactgg  
cgatcttgagtcgctgaagttagcggaatgtgtggtgtagcgggtgaaatgcttagatatcacacagaacaccaattgcgaaggcagctggct  
aacacgcaactgacgctgagggacgaaagtgtggggatcaaaca

>249f01a059913cd078a31dba3d5651ce

tagggaatcttcgcaatggacgaaagtctgacggagcaacgccgctgtatgaagaaggttttcggatcgtaaagctctgttgggtgaaga  
aggatagaggtagtaactggcctttatttgacggtaatacaccagaaagtcacggctaactacgtgccagcagccggttaatacgtaggtggc  
aagcgttgcggatttattggcgtaaagcgagcgcaggcggaataaagtctaattgaaagccctcggcttaaccgaggaactgcatcgg  
aaactgttttcttgagtcgagaaggagagtggaactccatgtgtagcgggtggaatgcttagatatggaagaacaccagtggcgaaggcg  
gctctctggtctgcaactgacgctgaggctcgaagcatgggtagcgaaca

>24a2a019f7af197ef711f8728c88c937

tggggaatcttcgcaatgggcgaaagcctgacgcagcaacgccgctgtagggatgacggccttcgggttgtaaaccgcttccagcaggagc  
aaaatgacggtagctgcagaagaagctccggctaactacgtgccagcagccggttaatacgtaggagcaagcgttgcggatttattgggc  
gtaaagagctcgtaggcggttccgtaagtcgagtgtaaaaatctgggctcaaccagtggagcactcgatactcgggtgactagagtcggta  
ggggagtgtaggaattcctggttagcggtgaaatgcgcagatatcaggaggaacaccgacggcgaaggcagcactctgggccggtactgacgc  
tgaggagcgaagcgtggggagcaaaca

>24b4fb451c481ffdc9416946465da973

tgaggaatcttcgcaatgggcgaaagcctgacggagcaataccgctggaggatgacggccttggttctaaactcctttcttagagaaga  
agtctgacggtatctaaggaataagcatcggctaactccgtgccagcagccggttaatacggggatgcaagcgttatccggaatgattggg  
cgtaaagcgtctgtaggtggcttccaagtcaactgtcaaaaatcagggttaaccttgagccggcagttgaaactatgaagcttgagttaggta  
ggggcagagggaattcctagttagcggtgaaatgcatagataccataaggaaacaccgatagcgaaggcattgtactggccataaactgacgc  
tgaggcacgaaagcgtgggttagcgaaca

>24f50b16b37746b08a20a5eb90b4c73a

tgaggaatattgcacaatgggggcaaccctgatgcagcgacgccgctggatgatgaaggccttcgggttgtaaagtcttttgcactgacga  
gaacggagcgttaggtggcgaataagccccggctaactacgtgccagcagccggttaaacgtaggggcgagcgttatccggagttagggg  
cgtaaagggtgtgtaggcggtgctataagtgggtgtgaaacgctcaggctaaacctgggaggtgcgcctcagactgtaggactagagtggtg  
agagggcgctggaattccgggtggagcggtgaaatgtgtagatccggaggaaacaccagaggcgcaagcggcgccctgggtcccaactgac  
gctgaaacacgaaagcttggggagcgaacg

>252f50a6f92d7a32582ad1a1ea8eee2a

taaggaatattggtcaatggagggaactctgaaccagccatgccgctgaaggatgacggccttcgggttgtaaactcttttggatggggcga  
aaaaacgggatttatctggactgacggtaccatcagaataagcaccggctaactccgtgccagcagccggttaatacggagggtgcaagcg  
ttatccggaatcactgggtttaaagggtgcgtaggcggttgataagttaggggtgaaaggatgacgcttaactgtataattgcctttgatactgt  
atgacttgaataaggttaggttgccggaatgtgacatgtagcgggtgaaatgcttagatatgtcatggaacaccgattgcgaaggcagctgact  
gggcctttattgacgctgaggcacgaaagcgtgggttagcgaaca

>25584125e3f1ee7c95c4b41e8c9accd8

taaggaatattgggcaatggagggaactctgaccagccatcccgcgtgaaggattaaggccctatgggttgtaaactcttttcttgggaaga  
aatctggacattatgtgcagttgacggtaccttgcaataagcaccggctaactccgtgccagcagccggttaatacggagggtgcaagcgtt  
atccggaatcactgggtttaaagggtgcgtaggcggttgataagttagaggtgaaagctagcagcttaactgttaaatgcctttgatactgtca

gacttgaatcaggttgaggttagcggaatgtgacatgtagcggtgaaatgcatagatatgtcatagaacaccaattgcgtaggcagcttgctgg  
gcttgaattgacgctgaggcacgaaagcgtggggatcaaaca

>261757c8a6b3be6d75401cc317d6013b

tggggaattttgacaatgggcgcaagcctgatccagccatgccgctgagtgaaagaaggccttcgggttgtaaagctctttcagccggaaga  
aaacgcacgggataatacctgtgtggatgacggtaaccggaagaagaagcaccggctaactacgtgccagcagccggttaatacgtagggt  
gcgagcgtaatacgggaattactgggcgtaaagcgtgcgcaggcgggtttgtaagacagatgtgaaatccccgggcttaacctgggaactgcatt  
gtaactgcaaggctagagtacggcagagggggtagaattccacgtgtagcagtgaaatgcgtagatatgtggaggaataccgatggcgaag  
gcagccccctgggtcgatactgacgctcatgcagaaagcgtggggagcaaaca

>27a09ac8f99de7f517bac356cb718ec1

tgaggaatattgcacaatggacgcaagtctgatgcagcaacgccgctggaggatgaaggcccttgggtcgtaaactcctttttcggggaaga  
gcgaggacggtaaccgaagaataagtcacggctaactacgtgccagcagccggttaatacgtagggtggcaagcgttatccggaattactggg  
cgtaaagcgacgcaggcgggtcttgtaagttgacgtgaaagctcccggttaactgggagaggtcgttgaatactgcgagacttgagtttagga  
gaggggtgtagaattcccggtgtagtgggtggaatgcgtagatatcggggggaataccagtggcgaagcggcaccttagcctttgactgacgct  
catgtgcgaaagcgtggggagcgaacg

>27a8a5e5def204e1d3b37d9cad1b2163

tgaggaatattgggcaatgggcgcaagcctgaccagcaatgccgctgcgggatgaaggtcctcggtatcgtaaaccgcttttggtggggagta  
gcaaggagagtacccacgaataagtcacggctaactacgtgccagcagccggttaatacgtagggtgacaaatgttatccggaatcactggg  
cgtaaagggtctgtaggcggttacttaggtctgatgtgacacctcggcttaactgagagagcgattggaaaccgggtgactagaatcacgtc  
gaggtcgggtggaattcccggtgtagtgggtggaatgcgtagagatcgggaggaacctcgaaagcgaaggcagccggttagacgatgattgacgc  
tgagggacgatagcgtgggttagcaaaca

>27ca45934f052c3f043c9b8c3e0fbf79

tggggaatcttgacaatgggcgaaagcccgatccagcaatatcgctgagtgaaagaagggaatgccgcttgtaaagctcttcgctcagtg  
gcgatcatgacaggactcgaggaagaagccccggctaactccgtgccagcagccggttaagacggggggggaagtggtcttcggaatgact  
gggcgtaaagggcacgtaggcggtgaatcggttgaaagtgaagtcgcaaaaagtggcggaatgctctcgaaaccaattcacttgatgag  
acagaggagagtggaaattcgtgtgtaggggtggaatccgtagatctacgaaggaacgcaaaagcgaaggcagctctctgggtccctaccga  
cgctggggtgcgaaagcatggggagcggaca

>2a51faea8805a40017458dfed28abf95

tgaggaatattgcgcaatgggcgaaagcctgacgcagcgacgccgctggaggatgacggccttcgggttgtaaactcctgtcagtggggaag  
agataggacggtaccactgaggaagcttcggctaactacgtgccagcagccggttaagacgtagggagcaagcgttgccggaattactgg  
gcgtaaagagctcgtaggcgggagcgttaagtctgaaaggaaatctcaaggctcaactttggggcttttcggatactgcgttcttgaggttatca  
gaggaaagttagaattcccggtgtagcgggtgaaatgcgtagatatcgggaggaataccagtggcgaaggcagcttctgggatacacctgacgc  
tgaggagcgaagcgtggggagcaaacg

>2ae4521786b3fde8d5b03c2d7a969f05

tggggaatattgcacaatgggcgcaagcctgatgcagccatgccgctgtgtgaaagaaggctctagggttgtaaagcactttcagtagggagga  
aagcttgatgattaatactcattaagtgtgacgttacctacagaagaagcaccggctaactccgtgccagcagccggttaatacggagggtgc  
aagcgttaatacgggaattactgggcgtaaagcgacgtaggtggtttgttaagttggatgtgaaagccccgggctcaacctgggaactgcacca  
aaactggcaactagagtacggttaggtgagtggaatttcctgtgtagcgggtgaaatgcgtagagatgggaaggaacatcagtggcgaaggc  
gactcactggactgatactgacactgaggtgcgaaagcgtgggttagcaaaca

>2bc7b9e573a2b2a6c4532b0201eb5202

tagggaatcttccgaatggacgaaagtctgacggagcaacgccgctgtatgaagaaggttttcggatcgtaaagtactgtttagagaaga  
acaaggataagagtaactgcttgtcccttgacggatctaccagaaagccacggctaactccgtgccagcagccgcgtaatacggagggtgc  
gagcgttaactcggaattactgggcgtaaagcgtgcgtagggcggtttcgtaagtcgggtgtgaaagccccgggctcaacctgggaattgcattcga  
gactgcggagctggagtgcggaagagggaagtggaaattccggtgtagcggtgaaatgcgtagatatcggaaggaaacatcagtggcgaaagc  
gacttcctggtccagcactgacgtcaggcacgaaagcgtggggagcaaaca

>2cddfae297288d5ca73cbbb3d23bd150

tggggaatcttgacaatgggcgaaagcccgatccagcaatatcgctgagtgagaagggaatgccgcttgtaaagctcttctgcgtgagtg  
gcgatcatgacaggactcgaggaagaagccccggctaactccgtgccagcagccgcgtaagacgggggggcaagtgttcttcggaatgact  
gggcgtaaagggcacgtaggcggtgaatcggttgaaagtgaagtcgcaaaaagtggcggaatgctctcgaaaccaattcacttgagtga  
acagaggagagtggaaattcgtgttaggggtgaaatccgta

>2d22082be15e55bfa7cddabbc4f4c48a

tgaggaatattgggcaatgggcggaagcctgaccagcaacgccgctggaggatgaaggccttcgggtcgtaaactcctttgacggggaag  
aggaaggacggtaccgctgaataagtcacggctaactacgtgccagcagccgcgtaatacgtagtgacaagcgttatccggaattactgg  
gcgtaaagcgacgcaggcggtgcttaagtctgacgtaaaatctcctggcttaactgggaggggtcgttgaaactgagtagcttgaggcagt  
gagaggggtgtagaattccggtgtagtggtggaatgcgtagatatcgggaggaataccagaggcgaaggcgacacctggcactggcctgac  
gctcatgtgcgaaagcgtggggagcgaacg

>2e1d9bd34c1e9487db5b067664bd02db

tagggaatcttccgaatggacgaaagtctgacggagcaacgccgctgtatgaagaaggttttcggatcgtaaagtactgtttagagaaga  
acaaggataagagtaactgcttgtcccttgacggatctaccagaaagccacggctaactacgtgccagcagccgcgtaatacggaggggg  
ttagcgttgttcggaattactgggcgtaaagcgcgctagggcgactggaaagtgggggtgaaatccccgggctcaacccggaaactgcctcc  
aaaactatcagctagagttcgagagaggtgagtggaattccgagtgtagaggtgaaattcgtagatatcggaggaacaccagtggcgaagg  
cggctcactggctcgatactgacgtgaggtgcgaaagtgtggggagcaaaca

>2ea64f17e205d8bb1f145b2b4990f5b6

tagggaatattgggcaatggacgagagtctgaccagccatgccgctgcaggaagacggcgttctgcgttgtaaactgctttatctgggaaga  
aaatgcccctgcgggggaaattgccggtaccagatgaataagcaccggctaactccgtgccagcagccgcgtaatacggaggggtgcaagcgt  
tgtccggatttattgggtttaaagggtgcgtagggcggtgttaagttagtggtgaaagactccggctcaacggagcagtgccattgatactgga  
cagcttgagtattggaggggtacatggaattgatggtgtagcggtgaaatgcatagataccatcaggaacaccgatagcgaaggcattgtactg  
gccaataactgacgtgatgcacgaaagcatgggtagcgaaca

>2eff554abc8e8941585317c668a430ab

tccggaatcttgacaatgggcgaaagccagatccagccatattacgtgaaggatgaagactttttggttgtaaactctttactttttaagtta  
aagagtataaaaagccccggctaaatctgtgccagcagccgcgtaatacagatggggcaagtgttattcggaatgattgggcgtaaagggtg  
cgtaggtgggtttattagtcagttgtcacaaccttttagaaaagaatcgagctttaaagactacaaaacttgagttgtagaggaaagcgg  
aatgttgagtgagagatagaattcatagatatcaaaggaacaccgaaaacgaaggtagctttctgggtcaacactgacgtcatgtacgaaa  
gcatggggagtaaag

>2fda61c8fb70794f30a9770ad9d6bdee

tggggaatattgcacaatgggcgaaagcctgacggagcaataccgctggaggatgacggcctgtgggtcttaaactcctttcttagagaaga  
agttctgacggtatctaaggaataagcatcggtactccgtgccagcagccggttaatacgggggatgcaagcgttatccggaatgattggg  
cgtaaagcgtctgtaggtggctttcaagtcaactgtcaaaaatcagggttaaccttgagccggcagttgaaactatgaagcttgagttaggtg  
ggggcagagggaattcctagtgtagcgggtgaaatgcgtagatattaggaagaacaccaatcgcgaaagcactctgctgggcatgactgacac  
tgagagacgaaagctaggggagcgaatg

>319b1e53bf29bf9d5d4236924ecb2666

tggggaatccccgcaatgggcgaaagcctgacggagcaatgccgcgtggaggtagaaggccacgggtcatgaactatccccggagaag  
aagcaatgacggtatctggggaataagcatcggctaactctgtgccagcagccgcgtaatacagaggatgcaagcgttatccggaatgattgg  
gcataaagcgtctgtagtggtcttttaagtcgccgtcaaatcctagggtcaactctggacaggcgggtggaaactaccaagctggagtacggt  
aggggcagaggggaatccccggtggagcggtgaaatgcgtagagatcggaagaacaccaacggcgaaacgcactctgctgggccgacactgac  
actgagagacgaaagctaggggagcgaatg

>31a3138f02e3ce5e20e19f918b59cb

tggggaatccccgcaatgggcgaaagcctgacggagcaatgccgcgtggaggtagaaggccacgggtcgtgaacttccccggagaaga  
agcaatgacggtatctgagggaataagcatcggctaactctgtgccagcagccgcgtaagacagaggatgcaagcgttatctggaatgattgg  
gcgtaaggcgtctgtagtggtcttttaagtcgccgtcaaatccagggtcaacctggacaggcgggtggaaactaccaagctggagtacgg  
taggggcagaggggaatccccggtggagcggtgaaatgcgtagagatcggaagtagaccaacggcgaaagcacctgctgggccgacactga  
cactgagagacgaaagctaggggagcgaatg

>31cf8a209b8a034efdcfc64586de530b

tggggaatcttagacaatgggcgcaagcctgatctagccatgccgcgtgagtgatgaaggccttagggctgtaaaagctctttccagggatgat  
aatgacagtacctggtaaagaaacccggctaactccgtgccagcagccgcgtaatacggagggggttagcgttgttcggaattactgggcgt  
aaagcgcacgttaggcggactattaagtcagagggtgaaatccggggctcaacccgggaactgccttgatactggtagctttagttcgagaga  
ggtgagtgggaattccgagttagagggtgaaatcgtagatattcgagggaacaccagtggcgaaggcgggtcactggctcgatactgacgctga  
ggtgcgaaagtgtggggagcaaaca

>31f562dd50fbb77a7c444322458b0ac

tggggaatccccgcaatgggcgaaagcctgacggagcaataccgcgtgagggtgacggcctatgggttgtaaacctcttttcagggagga  
acaaaatgacgtgtacctgaagaataagcatcggctaactccgtgccagcagccgcgtaagacggaggatgcaagtgttatccggaatcact  
gggcgtaaagcgtctgtagtggttttaataagtcgaactgttaaatcttgagggtcaacctcgaaatcgagtcgaaactattagactagagtata  
gtaggggttaaagggaatccccagtgaggcggtgaaatgcgtagagattggaagaacaccgatggcgaaaggcactttactgggtattactaa  
cactgagagacgaaagctagggtagcaaatg

>32cc015d582a042949b29ac11915851f

tagggaatattgcacaatgggcgaaagcctgatgcagcaatgccgcgtgtgtgaagaaggcctgagggttgtaaaagcactttcaatagtgaag  
aaaagcacagggttaataaccttggtgttgacgttaactatacagaagcaccggctaactccgtgccagcagccgcgtaatacggagggtg  
caagcgttaatcggaattactgggcgtaaagcgtctgtagtggtttcaagtcaactgtcaaaaatcagggttaaccttgagccggcagttg  
aaactatgaagcttgagttaggtaggggcagaggggaattcctagtgtagcggtgaaatgcgtagatattaggaagaacaccaatcgcgaaagc  
actctgctgggccatgactgacactgagagacgaaagctaggggagcgaatg

>332823abd72d40758e55149bceddb7da

tgaggaatattgccaatgggggaaacccctgaggcagcaacgccgcgtggaggaagaaggtcttacgatcgtaaacttctttgtgagggaag  
aggaaggacggtacatcatgaataagtcacggctaactacgtgccagcagccgcgtaatacgtaggtgacgagcgttatccggaattactggg  
cgtaaagcgtacgcaggcggcatggttaagtctgacgtgaaatctcctggcttaactgggagaggtcgttgagactgctgtgcttgagacaatg  
agaggggtgcagaattcccgggtgtagtggtggaatgcgtagatatcgggaggaataccagaggcgaaagcggcacccctggcattggtctgacg  
ctcatgtacgaaagcgtgggtagcaaacg

>3333c920cb06e1e10e2f1e2b0029038a

taaggaatattggacaatggtcggaagactgatccagccatgccgcgtgaaggacgaaggcgtcagcgttgtaaacctctttgtacgggaac  
aaaaccaccaatgcgttggtgtctgagggtaccgtaagaataagcaccggctaactccgtgccagcagccgcgtaatacggagggtgcaagc  
gttatccggaatcactgggttaaagggtgcgtaggcggttcgataagtcagttgtgaaattccctcgcttaacgagtgggactgcgattgatact  
gttgaaactgaaatcaggttaggttagcggaatgtgacatgtagcggtgaaatgcatagatatgtcatagaacaccgattgcgaaggcagcttg  
ctggacctgtattgacgtgaggcacgaaagcgtggggagcaaaca



>33b25a87cd5a86c71c5b680d3b9229d3

tggggaatccccgcaatgggcgaaagcctgacggagcaatctcgctgagggatgacggcctatgggttgtaaactcttttcagggaggaa  
taaaatgacgtgtacctgaagaataagcatcggctaactccgtgccagcagccggtgaagacgaggatgcaagtgtatccggaatcactg  
ggcgtaaagcgtctgtaggtggcttaataagtaactgttaaatcttgaaagcttaactcaaaatcgagttgaaactattagactagagtatagt  
aggggtaaagggaattccagtgagcgggtgaaatcgtagagattggaaagaacaccgatggcgaaggcactttactgggctattactgaca  
ctcagagacgaaagctagggtagcaaatg

>3484878bbc7e9747c3e3cc2553721aaf

tggggaatccccgcaatgggcgaaagcctgacggagcaatgccgctggagggtgaaggcctacgggtcgtaactcttttcgagagaaga  
aacaatgacggtatctgaggaataagcatcggctaactctgtgccagcagccggtgaagacagaggatgcaagcgttatccggaatgattgg  
gcgtaaagcgtctgtaggtggctttcaagtcgccgtcaaataccagggctcaaccctggacaggcgggtgaaactaccaagctggagtacgg  
taggggcagagggaattccggtggagcgggtgaaatgcattgagatcggaagaacaccaacggcgaaagcactctgctgggcccagactga  
cactgagagacgaaagctaggggagcaaatgggattagataccccggtag

>3534b4be198dac95882f6e730b647c60

tggggaatattgcacaatgggggaaaccctgatgcagcaacccgctgagtgagaagtatttcggtatgtaaagctctatcagcagggaag  
ataatgacggtacctgactaagaagctccggctaaatacgtgccagcagccggtgaatacgtatggagcaagcgttatccggttactgggt  
gtaaaggggtcgtaggtggcagtgcaagtcagatgtgaaagccggggtcaacccggagctgcattgaaactgctcggttagagtacagg  
agaggcaggcgaattcctagtgtagcgggtgaaatcgtagatattaggaggaacaccagtggcgaaggcggcctgctggactgttactgaca  
ctgaggcacgaaagcgtggggagcaaacg

>35684023cba433c1739a36685ae21b57

tgaggaatattgggcaatgggcggaagcctgaccagcaacccgctggaggaagacggccttcgggttgtaaactcctttacgggggaag  
aggaaggacggtaccccgagaataagtcacggctaactacgtgccagcagccggtgaatacgtaggtgacaagcgttatccggaattactgg  
gcgtaaagcgacgcagggcgccgcatgaagtctgtagtgaatctccggcttaactgggaggggtcattggaaactgtagtcttgaggcgggt  
gagaggggtgtagaattccgggtgtagtggtggaatgcgtagatatcgggaggaataaccagtggcgaagcggcacctggcactagcctgac  
gctcatgtgcgaaggcgtggggagcgaacg

>35ab1d83c148531f0c55fed902065d57

tagggaatcttcgcaatgggagaaagctgacggagcaacccgctgtagaagaagtttcggatcgtaaagtactgtttagagaaga  
acaaggataagagtaactgttgccttgacggtatctaaccagaaagccacggctaactacgtgccagcagccggtgaatacgtaggtggc  
aagcgttaatcggaattactggcgtaaagcgccgtaggtggtttgttaagttggatgtgaaagccagggctcaaccttggaactgcattcaa  
aactgactcgtagagtacgagagaggttagtggaatttcctgtgtagcgggtgaaatcgtagagatgggaaggaacaccagtggcgaaggcg  
actgactggctgatactgacactgaggtgcgaaagcgtggggagcaaacg

>362324a4d733ca0d96c9e017cf9c44a7

tgaggaatccccgcaatgggcgaaagcctgacggagcaataccgctggaggatgacggcctgtgggtcttaactcctttcttagagaaga  
agttctgacggtatctaaggaataagcatcggctaactccgtgccagcagccggtgaatacgggggatgcaagcgttatccggaatgattggg  
cgtaaagcgtctgtaggtggctttcaagtaactgtcaaaaatcagggttaaccttgagccggcagttgaaactatgaagcttgagttaggtg  
ggggcagagggaattcctagtgtagcgggtgaaatcgtagatattaggaagaacaccaatcggaagcactctgctgggccattggaagaac  
accaatcggaagcactctgctgggcatgactgacactgagagacgaaagctaggggagcgaatg

>369d8e9d322e5d94c1d2d45988eb9678

tggggaatcttcgcaatgggcgaaagcctgacgcagcaacccgctgcgggaagaaggccttcgggttgtaaaccgcttcagaaggaacg  
aaactgacggtactttcagaagaaggtgcggccaactacgtgccagcagccggtgacacgtaggcaccaagcgttgctccggttattgggc  
gtaaagagctcgtaggcgggttggtgaatcggtgtgaaaactttgggctcaacccaaagcgtgcactcgatactgccgtgactagagttcggtg

ggggagtggggaattcctagtgtagcggtgaaatgcgcagatattaggaggaacaccgggtggcgaaggcgccactctgggccgaaactgacgc  
tgaggagcgaagcgtgggtagcaaaca

>36dc31196b3417f0d036e823f1f6043e

tgagggaatttccgcaatgggcgaaagcctgacggagcaatgccgctgaaggatgaaggcctatgggttgtaaactcttttctcagaaaaga  
attatgacggtatctgaggaataagcatcggctaactctgtgccagcagccgcggtgaagacagaggatgcaagcgttatccggaatgattgggc  
gtaaagcgtctgtaggtgtttaaaaagtattctgtcaaagattagggcttaaccctagataggcagaataaacttttaagctagagtttggtaga  
ggcagagggaattcccggtggagcggtgaaatgcgtagatatcgggaggaacaccaaaggcgaaggcactctgctgggccaataactaact  
gagagacgaaagcagggggagcaaatg

>38a5e2958a7ef3691d30bf15ee1d63a2

tggggaatattggacaatgggcgaaagcctgatccagcaataccgctgagtgtgacggccttcgggttgtaaactcttttagtagggaaga  
taatgacggtacctacagaaaaagcaccggctaactctgtgccagcagccgcggtgaatacgaagggtgctagcgttctcggaatcattgggcg  
taaagggtgcgtagggcgtttgacaagtcagttgtgaaagccagggctcaaccctggaactgcaattgaaactgttagactagaatttggtgg  
gggtagtagaattcctagtgtaggggtgaaatccgtagatataggaggaataccagtggcgaaggcgactgtctataccaacattgacgctg  
aggcacgaaagcgtggggagcaaaca

>38d57115412b3f39c4f0aeb51bc83e2b

tagggaatattgggcaatggaggcaactctgaccagccatgccgctgtaggaagaaggcgttctgctgtgtaaactacttttatcggggaag  
aaagtcattcttcgaggtgatttgacggtactcgaggaataagcaccggctaactccgtgccagcagccgcggtgaatacggagggtgcaagc  
gttgcctggatttattgggtttaaagggtgcgtaggtggttgataagtcgtacctgaaagtgggcccgttaacggcacagggtggttgatactg  
tcgaactgaattaggcggaggttccggaacggatggtgtagcggtgaaatgcgtagagatcatccagaacgccaattgcgtaggcaggtgg  
ctacgcctatattgacactgaggcacgaaagcatggggagcaaaca

>38dde236a165157c60122f2323c0b023

tagggaatcttccgcaatggacgaaagtctgacggagcaacgccgctgtatgaagaaggtttccgatcgtaaagtactgtttagagaaga  
acaaggataagagtaactgcttgccttgacggtatctaaccagaaagccacggctaactacgtgccagcagccgcggtgaatacgtaggtggc  
aagcgttgcggtatttattggcgtaaagcgagcgcaggcggtaattaagtctgtatgtgaaagccccggctcaaccggggagggtcattgg  
aaactggtgacttgagtgcagaagaggagagtgaattccatgtgtagcggtgaaatgcgtagatatatggaggaacaccagtggcgaaggc  
gactctctggtctgaactgacgctgaggctcgaagcgtgggtagcaaaca

>3928ddf1976d57ac8d94987814e95410

tggggaattttcgcaatgggcgaaagcctgacggagcaatgccgctggagggtggaaggcctacggttcgtcaactcttttctcggagaagaa  
acaatgacggtatctgagggataagcatcggctaactctgtgccagcagccgcggtgaagacagaggatgcaagcgttatccagaatgattggg  
cgtaaagcgtctgtaggtggcgtttcaagtccgctcaaatccagggctcaaccctggatatgcgacggaaactaccaagtggagtacggta  
ggggcagagggaatttccggtggagcggtgaaatgcattgagatcggaagaacaccaacgggtgaaagcactctgcggggtcgacactgaca  
ctaagagacgaaagctaggggagcaaatg

>39eb2e97332a21c1039d7078f87fc251

tagggaatattgggcaatggatgcaagtctgaccagccatgccgctgcaggaagaaggctcctctggattgtaaactgcttttgcggggaag  
aagagtcattcttcgaggtgatgtgacggtaccgatgaataagccacggctaactacgtgccagcagccgcggtgaatacgtaggtggcaagc  
gttgcctggatttattgggtttaaagggtgcgtaggtggttgtaagtgcgtgaaagcgtggtgctcaacaatcaagttgccattgatactgt  
cagacttgagagaagtggaggctcatggaatggatggtgtagcggtgaaatgcatagatcatccagaacgtcgattgcaaggcagtgggc  
tgtacttttctgacactgaggcacgaaagcgtggggatcaaaca

>3a1dd0ac2f3c9915f9d57965195df608

tgaggaatattgccaatgggcgcaagcctgaggcagcaacccgcgtggacgatgaaggccttcgggttgtaaagtcctttctgggggaaga  
gcaaggacggtacccaggaagaaagtgctggctaactacgtgccagcagccgcggtaaaacgtaggacgcgaacgttatccggatttactggg  
cgtaaagcgcgtgcaggcgggtggcttaagtcgtgcgtgaaagctccctggctcaaccgggagaggccgcgcgaactgggtcactggaggacg  
gtagaggcgtgtggaattccgggtgtagtggtgaaatgcgtagatatccggaggaacaccagtggcgaaggcgacacgctgggccgtacctga  
cgctcagacgcgaagcatgggtagcgaacg

>3a3ad52203346a781c34c4fecbf8ffaf

tggggaatatttgacaatgggggaaaccctgatccagccatgccgcgtgcaggatgaaggccttcgggttgtaaactgctttgtacggaacgaa  
aaggtcttttctaataaagaaggctcatgacggtaccgtaagaataagcaccggctaactacgtgccagcagccgcggtatactaggggtgca  
agcgttaatcggaattactgggcgtaaagcgtgcgcaggcgggtatataagacagatgtgaaatccccgggctcaactgggaactgcattagt  
gactgtatagctagagtgcggcagagggggatggaattccgcgtgtagcagtgaatgcgtagatatcgagggaacaccgatggcgaaggc  
aatccctgggctgcactgacgctcatgcagaaagcgtggggagcaaca

>3b9e7583526db086712f074037225c90

tggggaatatttgacaatgggcgaaagcctgatccagccatgccgcgtgtgtgaagaaggcttcggattgtaaagcactttaagttgggagga  
agggtttagcttaatacgcgtgaaccttgacgttaccaacagaataagcaccggctaactctgtgccagcagccgcggtatacagagggtgc  
aagcgttaatcggaattactgggcgtaaagcgcgcgtagcggtttgttaagttggatgtgaaagccccgggctcaactgggaactgcattca  
aaactggcaagctagagtacgtagagggtggtggaatttctgtgtagcggtgaaatgcgtagatataggaaggaacaccagtggcgaaggc  
gaccacctggactgatactgacgctgaggtgcgaaagcgtggggagcaaca

>3bf736831a6492071c843b2bf9acde07

tggggaatattgcacaatgggcgcaagcctgatgcagccatgccgcgtgtgtgaagaaggccttcgggttgtaaagcactttcagcgaggagga  
aaggttagtcgctaataatcggttagctgtgacgttactgcagaagaagcaccggctaactccgtgccagcagccgcggtatacggagggtgc  
gagcgttaatcggaattactgggcgtaaagcgtgcgtagcggtttgttaagcgagatgtgaaagcccagggtcaacttggaaactgcatttcg  
aactggcaggctagaatttttagaggggtggtggaatttccagtgtagcggtgaaatgcgtagagattggaaggaacatcagtggcgaaggcg  
gccacctggacaagaattgacgctgaggcacgaaagcgtgggtagcaaca

>3cd10ece5b7d9d72123ca1ee0c590466

tggggaatatttctgcaatgggcgaaagcctgacagagcaataccgcgtgagggaacgaaggcttcgagttgtaaactctttttcaaggatga  
agatctgacagtacttgagaataagcatcggctaactctgtgccagcagccgcggtatacaggggatgcaagtgttatccggaattattggg  
cgtaaagcgtctgtaggttatttataagtcctttgttaaatatttaagcttaactaaaaatgcaaaggaaactatttatcagagtttgtaga  
ggtaaagggaatttcagtgaaatggtgaaatatttagatattggaagaacaccaaggcggaaggcattttactgggccataactgacactga  
gagacgaaagctaggggagcaaacg

>3cdac49092de5170c435f4b13a995bcd

tagggaatcttcggcaatggacggaagtctgaccgagcaacgccgcgtgagtgaagaaggcttcggatcgtaaagctctgttgtaagagaaga  
acgagtgtagagtggaaggtcacactgtgacggtatcttaccagaaaggagcggtactacgtgccagcagccgcggtatacgttaggtcc  
cgagcgttgccgatttattgggcgtaaagcgagcgaggcgggttagataagtcgaagttaaaggctgtggcttaacctagtagcgtttgga  
aactgttaacttgagtgaagaggggagagtgaattccatgtgtagcggtgaaatgcgtagatatatggaggaacaccggtggcgaagcg  
gctctctggcttgtaactgacgctgaggctcgaaagcgtggggagcaaacaggattagataacccggtag

>3d15e3688f6bc1b259179731480ea69d

tggggaatcttagacaatgggggaaaccctgatctagccatgccgcgtggacgatgaaggccttaggggttgtaaagtcctttcagctgggaaga  
taatgacggtaccagcagaagaagccccggctaactccgtgccagcagccgcggtatacggagggggctagcgttgttcggaattactggg  
gtaaagcgcacgtaggcggtacgcaagttagaggtgaaatccccgggctcaacccggaactgcctttaaaactgttggtcttgagtgcaga  
gaggtgagtgaattccgagtgtagaggtgaaatcgtagatatccggaggaacaccagtggcgaaggcggctcactggctcgatactgacgct  
gaggtgcgaaagcgtggggagcaaca

>3dd50350bc4b9419a97c68f68c2da444

tggggaatattggacaatgggcgcaagcctgatccagccatgccgcgtgagtgaaggccttagggttgtaaagctctttcaccgatgaagat  
aatgacggtagtcggagaagaagccccggctaactctgtccagcagccgcggaatacgaaggggtagcgttggtcgggaattactgggctg  
aaagcgcacgtaggcggaatattaagtcaggggtgaaatcccggggctcaacccgggaactgcctttgatactgggtatcttgagtatggaaga  
ggttagtggaattgcgagtgtagaggtaaattcgtagatattcgaggaaacaccagtggcgaaggcggtgactggtccattactgacgtga  
ggtgcgaaagcgtggggagcaaaca

>3e045903da074348b5e9e8fe6a9f6796

tggggaatccccgcaatgggcgaaagcctgacggagcaatgccgcgtggaggtagaaggccacgggtcatgaactctttccggagaaga  
agcaatgacggtagctgaggaataagcatcggtactctgtccagcagccgcggaatacagaggatgcaagcgttatccggaatgattggg  
cgtaaagcgtctgtaggtggcttttaagtcggtcaaatccagggtcaactctggacaggcggtggaaactaccaagtgagtagcgta  
ggggcagagggaatttcgggtggagcggtgaaatgcgtagagatcggaagaacaccaacggcgaaagcactctgctgggcccagactgaca  
ctgagagacgaaagctaggggagcgaatg

>3e6d8538428124e5943fa94e85568e3a

tggggaatcttgacaatgggcgaaagcccgatcaagcaatatcacgtgagtgaagaagggaatgccgcttgtaaagctctttgttgagtc  
gtgatcatgatataactcaaggaagaacccctggctaactccatgctagcagcagcggtgaagatggggggcaagtgttcttggaatgactagg  
cataaaggcgctgtaggtctgaatcggttgatgtgaaagtcgtaaaagtgcggaatgctctcgaaccaattcggttgagtgggaag  
aggagagtgggaattcatgtgtagggtgaaatccgtagatctatgaaggaacaccagaagcgaaggcagctctatgggtccctaccgatgctg  
gagtgagaaagcatggggatcaaaca

>3f3a0eaeaa9c0690b6ede1b17b4fd8ce

tggggaatattgcacaatgggcgcaagcctgatgcagcgacccgcgtgcgggatgacggccttcgggttgtaaaccgctttgactgggagca  
agcccttcggggtgagtgactcttcgaataagcacgggtaactacgtgccagcagccgcggaatacgtagggtgcaagcgttatccggaatt  
attgggcgtaaagggtcgtaggcggttcgtcggtcggtgtgaaagtcctacgttaacgggtgatccgcgccgggtacgggcccgttgagt  
gcggtaggggagactggaattcccgggtgaacgggtggaatgtgtagatatcggaagaacaccaatggcgaaggcaggtctctgggcccgtcac  
tgacgtgaggagcgaaagcgtggggagcgaaca

>3fe9cac6db71748978f97b08de8e4301

tggggaatccccgcaatgggcgaaagcctgatccagccatgccgcgtgagtgaagaaggccttcgggttgtaaagctctttcggtcggaaga  
aatagttggtgctaataatccaataatgacggtagccagataagaagcaccggctaactacgtgccagcagccgcggaatacgtagggtgc  
aagcgttaatcggaattattggcgtaaagggtgcgcagcggttgataagtgcagatgtgaaatccctgggcttaacctaggaattgcgttgga  
aactatatgactagagtgtacagaggggagtggaattcatgtgtagcagtgaaatgcgtagagatgtggaagaacaccgatggcgaaggca  
gctccctgggttaacactgacgtcatgcacgaaagcgtggggagcaaaca

>3ffd7a6c44e9d72e8ade2a5627915433

tagggaatattggacaatgggcgaaagcctgatccagcaataccgcgtgagtgaaggctatttggtcgtaaagctctttctcgaggaag  
atgatgacggtagctgaagaagaagccctggctaactccgtgccagcagccgcggaatacggagagggtagtggtattcggaataattgggc  
gtaaagggcagtagcggtgaatcaagttgaaagtgaatccaaagcttaactttggaactgctttcaaaactgattcactagagttgatag  
gggacagtgggaatttctagtgtagagatagaattcataatattagaaggaacaccagtggcgaaggcgactgtctggatcaaaactgacgtg  
agggtcgaaagcatggggagcaaaca

>400fbcdf8f1ab6e064ee4202e22e07f9

tagggaatattgcgcaatgggcgaaagcctgacgcagcgatgccgcgtgagtgaaggcttaggattgtaaagctctttctgagggaaga  
ataggtctggtaggaaatgatcggtattcaggtacctaggaataaggaacggctaactccgtgccagcagccgcggaatacggaggtcc  
aagcgttggtcggaattactggcgtaaaggagcgagcggtgacaggtcagtttaaagtggaatccagggtcaacccggacgtgctttgg

atactgcctgtcttgagttcgtgagaggaaagtgggaattcaggggtgtagcggtgaaatgcttagatatcctgaggaacaccagtggcgaaagcg  
actttctggcacgaaactgacgtgaggctcgaaagcatgggtagcgaacg

>40449520ee5239c0dc0d2f4125df7dce

tggggaatattggacaatgggcgcaagcctgatccagccatgccgcgtgagtgatgaaggccctaggggtgtaaagctcttttgcgggaaga  
taatgacggtaccgcaagaataagccccggctaacttcgtgccagcagccgcggtaatcgaagggggctagcgttgctcggaatcactgggc  
gtaaagcgacgtagggcgggttctaagtcagaggtgaaatcctggagctcaactccagaactgcctttgatactgggagctagagttcgggag  
aggtgagtggaactgcgagtgtagaggtgaaattcgtagatattcgcaagaacaccagtggcggaaggcggctcactggccccgatactgacgt  
gaggtgcgaaagcgtggggagcaaaca

>4046d107e680a0fa8a0e45b91f169b1c

tagggaattgttcgcaatgggcgcaagcctgacgacgcaacgccgcgtggaggatgaagggttcggtcgttaaactccttcgaccgagatga  
atacccgagacttaatacgtttgcggactgacagtatcgagggaagaagccccggctaactcctgcccagcagccgcggtaatcggggggg  
gcaagcgttgctcggaattactgggcgtaaaggggtcgtaggtggccaactaagtcatacgtgaaatccctcagcttaactggggaaactgcgtct  
gatactggttggttgagtgaggagaggaacgcggaattccaggtgtagcggtgaaatgcgtagatatctggaggaacaccggtggcgaagg  
cggcgttctggactgtaactgacactgaggaacgaaagccaggggagcaaacg

>4098e79fc7e429d240cb80dfbe5180e2

tgaggaatattgggcaatggaggcaactctgaccagccatgccgcgtgcaggaagacggccctatgggttgtaaactgctttatacaggaag  
aaactgctacgtgtagcagctgacggtactgtaagaataagcaccggctaactcctgcccagcagccgcggtaatcgggggatgcaagc  
gttatccggaatgattgggcgtaaagcgtctgtaggtggcttttaagttctccgtcaaatcccagggtcaacctggacagggcgtgaaaacta  
ccaagctagagtacggtaggggcagaggggaatttcgggtggagcgtgaaatgcgtagagatcggaaggaacaccaacggcgaaagcactct  
gctgggccgacactgacactgagagacgaaagctaggggagcaaag

>409f711b59152d57926cf444c5577087

tagggaatcttcggaatgggggcaacctgaccgagcaacgccgcgtgagtgaaagggtttcggatcgtaaagctctgttgtaagtcaaga  
acgagtgtagagtggaagtacactgtgacggttagcttacagaaaggagcggctaactacgtgccagcagccgcggtaatcgtaggtc  
ccgagcgttgccggtattatgggcgtaaagcgagcgagggcgggttgataagtcgaagttaaaggcttggtcgaacctagttcgtttgga  
aactgtcaaactgagtgagaaggggagagtggaattccatgtgtagcggtgaaatgcgtagatatatggaggaacaccggtggcgaaagcg  
gctctctggtctgtaactgacgtgaggctcgaaagcgtggggagcgaaca

>40e8b3bc4f482bc7c62eed3a5d340af1

tagggaatcttcgcaatggacgaaagtctgacggagcaacgccgcgtgatgaagaaggccttcgggttgtaaagcactttcagtaaggagg  
aaaggttaagtgttaatagcgttagctgtgacgttacttacagaagaagcaccggctaactcctgcccagcagccgcggtaatcggagggtg  
cgagcgttaatcggaattactgggcgtaaagcgtacgcagggcgggttgtaagcgagatgtgaaagccccgggctcaactgggaactgcattt  
cgaactggcaactagagtgtagaggggtgtagaatttcaggtgtagcggtgaaatgcgtagagatctgaaggaataccgatggcgaagg  
cagccacctgggtcaactgacgtcatgtacgaaagcgtggggagcaaaca

>4169a76114b0f1a068b71ee3adf7befe

tgaggaatcttcgcaatgggcgaaagcctgacggagcaatgccgcgtgaagggaagaaggctcacgggtcgtaaactcttttctcggaaga  
ataaatgacggtatctgaggaataagcatcggtactctgtgccagcagccgcggtaaaacagaggatgcaagcgttatccggaattattggg  
cgtaaagtgtctgtaggtggcttttaagtcctgctcaaatcccagggtcaacctggacagggcgggtggaactatcaagctagagtacggta  
gaggcagagggaatttcgggtggagcgggtgaaatgcgttgagatcgggaggaacaccaaggcgaaagcactctgctgggcggttactgaca  
ctcagagacgaaagctaggggagcaaag

>42134c0ca555e7f9188352bddbb271da

ttaggaatattcgtcaatgggggaaacctgaacgagcaatgccgctgaaggaagacggctcctctggattgtaaacttctgtttagggaag  
aacgacctgtgtaggaaatgacataggagtacgggtacctttcaaaaagctccggctaactacgtgccagcagccggttaatacgtaggga  
gcgagcgttatccggaattattgggtgtaaagcgtgtgtaggcgggaaattaagtctaaggctaaagccggagctcaactccggttcgcttag  
aaactgattttctgtagtgtgtagaggcaaacggaatttctagtgtagcggtaaaatgcgtagatattagaaggaacaccagtggcgaaggcg  
gtttgtgggcccactactgacgctgagacacgaaagcgtggggagcaaata

>422a89f4b23ffe659b4707d193059776

tagggaatattggacaatggacgaaagtctgatccagcaacgccgctgaaggatgaaggcttaggattgtaaacttctttgacaggaggga  
taatgactgtacctgtagaataagcaccggctaacttcgtgccagcagccggttaatacgaagggtgccagcattactcggaaactactgggcg  
taaagaatcgtaggcgactgtcaagttaggagtgaatccctgggctcaacttaggaactgcttttaaaactgcttgttgaatgctagagt  
gattaggggaattcttgggttaggggtaaaatccgtagatatcaggaggaagaccggaagcgaagcgcttaattagctagatattgacgctga  
tgcataaaagcgtggggagcaaaca

>4233f16ea5b9a5801fdb1ed10e01c3bd

caaggaattttcggaatgggcgcaagcctgaccgagcaacgccgctggaggacgacggccttcgggtgtaaactccttttcgggggacga  
ttgtgactgtaccccgcaatcaggctcggctaactctgtgccagcagccggttaagacagaggagccaagcgtgtccggttagctgggcg  
taaagcgacgcaggcggtgggcacgtggggtgtgaaacctggcggcttaactgccagacgccatcccatacggcccggtcgaggcaggca  
gaggttctggaattgcgggtgtagtgggtgaaatgcgtagagatcggcaggaacaccaaggcgaaagcagcgaactgggcctgttctgacgc  
tcaggtgcgaaagcgtggggagcgaacc

>427a6228ffeff322ed0884d62b458799

tggggaattttggacaatggacgcaagtctgatccagcaatgccgctgcaggacgaaggccttcgggtgtaaactgctttgtacagaacga  
aaaagtctttaataaactagaggctcatgacgggtactgtagaataagcaccggctaactacgtgccagcagccggttaatacgtagggtgc  
aagcgttaatcggaattactgggctgaaagcgtgcgagcggttatataagacagatgtgaaatccccgggctcaactgggacctgattgt  
gactgtatagctagagtacggtagaggggatggaattccgctgtagcagtgaatgcgtagatatgagggaacaccgatggcgaaggca  
atccccggacctgtactgacgctcatgcagaaagcgtggggagcaaaca

>427f5142ae52662b7db0bdd5689461f0

tagggaatcttcggaatggacgaaagtctgaccgagcaacgccgctgagtgaagaaggttttcggatcgtaaaactctgtttagagaaga  
acaaggatgagagtaactgttcatcccttgacggtatctaaccagaaagccacggctaactacgtgccagcagccggttaatacgtagggtgc  
aagcgttgcggtattattgggctgaaagcgagcgcaggcggtttcttaagtctgatgtgaaagccccgggtcaaccggggagggtcattggc  
aactgggagacttgagtgcagaagaggagagtgaattccatgtgtagcgggtgaaatgcgtagatatgagggaacaccagtggcgaaggc  
ggctctctggtctgtaactgacgctgaggctcgaaagcgtggggagcaaaca

>42a83897f7eb0e989498521c8d97ef70

tagggaatcttcggaatggacgaaagtctgaccgagcaacgccgctgtatgaagaaggttttcggatcgtaaaactctgtttagagaaga  
acaaggataagagtaactgttcccttgacggtatctaaccagaaagccacggctaactccgtgccagcagccggttaatacggagggtgc  
aagcgttaatcggaattactgggctgaaagcgcgctaggcggcttagtaagtcggatgtgaaatcccagggttaaccttggaactgattcg  
atactgctaggctagagtatgttagaggcaagtgaattccaggtgtagcgggtgaaatgcgtagatatctggaggaacaccagtggcgaaggc  
gactgtctgggacaatactgacgctgaggtgcgaaagcgtggggagcaaaca

>42d354614bd2e8209fddbd2047d531bf

tggggaatattgcacaatggagggaactctgatgcagcagcggcgtgagcgatgaaggctttcagtcgtaaagctctgtcgaatgggaag  
ataatgacggtaccatttgagaaagccccggctaactacgtgccagcagccggttaatacgtagggggcgagcgttgcggaattattgggc  
gtaaagggttcgtaggcggcaatgtatgtcaggtgtgaaagacgggtgctcaaccaacgcaagcatctgaaactgcatagcttgagaaaagga  
gaggtgaagtgaattcctagtgtagcgggtgaaatgcgtagatattaggaggaataaccagtggcgaaggcgacttactggactttaactgacgct  
gatgaacgaaagcgtggggagcaaaca

>4394468b49611f78b96b64d72449fab5

tagggaatcttcacaatggg'gcgaagcctgatggagcaacaccgcgtgagtgaagaagggtttcggctcgtaaagctctgttgtaaagaaga  
acacgtatgagagtaactgttcatacgttgacggtattttaaccagaaagtcacggctaactacgtgccagcagccgcggtatactaggtggc  
aagcgttatccggtattattgggcgtaaagagagtgacggcggttttctaagctgatgtgaaagccttcggcttaaccggagaagtgcacgga  
aactggataacttgagtgcagaagagggtagtggaactccatgtgtagcggtggaatgcgtagatatatggaagaacaccagtggcgaaggcg  
gctacctggtctgcaactgacgtgagactcgaaagcatgggtagcgaaca

>43a54829cc0d7a58a61ad7f833cc2b22

tagggaatcttcgcaatggg'gcgaaagcctgacggagcaacccgcgtgagtgaagaaggcttcggatcgtaaaactctgttattagggag  
aacaatgtgtaagtaactatgcacgtcttgacggtacctaatacagaagccacggctaactacgtgccagcagccgcggtatactaggtgg  
caagcgttatccggaattattgggcgtaaagcgcgctagggcggtttttaagctgatgtgaaagccacggctcaaccgtggagggtcattgg  
aaactggaaaacttgagtgcagaagaggaaagtgaattccatgtgtagcggtgaaatgcgcagagatatggaggaacaccagtggcgaagg  
cgactttctggtctgtaactgacgtgatgtgcgaaagcgtggggatcaaca

>43aaec1829316c299caafec47e33d65

tggggaatattgcacaatggg'gcgaagcctgatgcagcgacgccgcgtgagggatgacggccttcgggttgtaaactctttcagcaggggaaga  
agcgaagtgcggtacctgcagaagaagcaccggctaactacgtgccagcagccgcggtatactaggtgagcggtgtccggaattat  
tgggcgtaaagagcttgtagcggtttgtcgcgtctgcagtgaataccggggctcaaccggacttgctgtgggtacgggcagactagagtg  
gtaggggagaccggaattcctggtgtagcggtggaatgcgcagatatcaggaggaacaccgatggcgaaggcaggtctctgggccacaactg  
acgtgagaagcgaaagcatggggagcgaaca

>43c634736bf9a70837bf33cc15d15143

tggggaatattgcacaatgggggaaaccctgatgcagccatgccgcgtgtgtgaagaaggccttcgggttgtaaagcactttcagcagggagga  
aaggtgatacctaatactatcagctgtgacgttactgcagaagaagcaccggctaactccgtgccagcagccgcggtatactaggggtgc  
aagcgttaactcggaattactgggcgtaaagcgcgctaggtggtttttaagtggaatgtgaaagccctgggctcaacctaggaactgcacccc  
aaactgacagactagagtacaatagaggggtgtggaatttctgtgtgacgggtgaaatgcgtagatataggaaggaacaccagtggcgaaggc  
gacaccctggattgatactgacactgaggtgcgaaagcgtggggagcaaca

>43cdcdfd1af40850bdbd8b6ef9f263c

tagggaatcttcgcaatgggagcgaagctgacggagcaacccgcgtgtatgaagaaggccttagggttgtaaaccctttcagcggggaag  
ataatgacggtacccgcagaagaagccccggctaactccgtgccagcagccgcggtatactaggggggtagcgtgttcggaattactggg  
cgtaaagcgcgctaggggatctgcaagttaggggtgaaatcccagggtcaacctcggaactgccttgatactgcggtacttgatccgag  
agaggtgagtgaattcctagttagaggtgaaattcgtagatataggaagaacaccagtggcgaaggcggctcactggctcggtactgacgc  
tagggcgcgaaagcgtggggagcaaca

>4424abb9b48a8cbe94a9f770ccdb5b72

tggggaatattgcgcaatggg'gcgaaagcctgacgcagcaacccgcgtgcgggatgaaggccttcgggttgtaaaccgctttcagtggggacg  
aattcagacggtacccacagaagaagccccggccaactacgtgccagcagccgcggtaacacgtagggggcgagcgtgttcggtattattgg  
gcgtaaagagctcgttaggcggctaagtaagttaggtgtgaaaactccagggtcaacctggagacgccacctcatactgctttggctagagtccg  
gtaggggagcatggaattcctggtgtagcggtgaaatgcgcagatatcaggaggaacaccagtggcgaaggcgggtgctctgggcccgtactga  
cgctgaggagcgaaagcgtggggagcaaca

>44f1735bd70d89609e5c57d046d2082a

tggggaatattgcacaatggg'gcgaaagcctgatgcagcaacccgcgtgcgggatgacggccttcgggttgtaaaccgctttcgctgtgacga  
agcgtgagtgcggtaatgggtaaagaagcaccggctaactacgtgccagcagccgcggtgatactaggggtgcgagcgtgttcggtattatt  
gggcgtaaagggtcgttaggtggttgatcgcgctcggaagtgtaatcttggggcttaaccctgagcgtgctttcgatacgggttgaactgaggaag

gtaggggagaatggaattcctggtggagcgggtggaatgcgagatatcaggaggaacaccagtggcgaaggcggttctctgggcctttcctgac  
gctgaggagcgaaagcgtggggagcgaaacaggattagataccccagtag

>44f1dc6802761224c2a2cd9047d09294

tggggaatattgcacaatgggcgaaagcctgatgcagcaacgccgctgagggatgacggccttcgggttgtaaactcttttagtagggaaga  
agcgaaagtgcggtacctgcagaaaaagcaccggctaactacgtgccagcagccggttaatacgtagggtgcaagcgtgtccggaattat  
tgggcgtaaagagctcgtaggcggtttgcgctgtgctgtgaaatcccagggtcaacctcgggtctgcagtgggtacgggcagactagagtgt  
ggtaggggagattggaattcctggtgtagcgggtggaatgcgagatatcaggaggaacaccgatggcgaaggcagatctctgggccattactg  
acgctgaggagcgaaagcatggggagcgaaaca

>4504469c97ce9a8eb989bc0bad2bf4ba

tagggaatcttcgcaatggacgaaagtctgacggagcaacgccgctgtatgaagaaggttttcggatcgtaaagtactgtttagagaaga  
acaaggataagagtaactgcttgccttgacggatatcaccagaaagccacggctaactacgtgccagcagccggttaatacggagggtgc  
aagcgttatccggaatcactgggtttaaaggtgcgtaggcggcctggtaagtcagaggtgaaatgcacgagcttaactggtgaattgcctttga  
aactatcaagctagaattatgttaggtcagcgggaatgagtcagtagcgggtgaaatgcatagatatgacttagaacaccgattgcgtaggcag  
ctggctaggcatatattgacgctgaggcacgaaagcgtggggagcgaaaca

>4614cd89c6385e270c69f3b383f5d5ce

tgaggaaatccgcaatgggcgaaagcctgacggagcaatgccgctggaggtagaaggcccacgggtcgtgaactcttttccggagaaga  
agcaatgacggatatctggggaataagcatcgggctaactctgtgccagcagccggttaatacagaggatgcaagcgttatccggaatgattggg  
cgtaaagcgtctgtaggtggccttttaagtccgacctcaaatcccagggtcaacctggacagcggtggaaactaccaagctggagtagcgt  
aggggcagagggaaatccgggtggagcgggtgaaatgcgtagagatcgaaagaacaccaacggcgaaagcactctgctgggccgacactgac  
actgagagacgaaagctaggggagcgaatg

>46cb0161377ebc0ca0fb7a9b5ac56164

tcgagaatcattcacaatgggcgaaagcctgatggtgtgacgccgctggaggatgaaggcttcggattgtaaactcctgtcaagtgagagta  
aagccgggcgttaactgcgagccggtttgagagtatcactagaggaagagacggctaactctgtgccagcagccggttaatacagagggtctc  
aagcgttcttcggaatcactggcgtaaaggtgcgtaggctgcacggtaagtcagatgtgaaagcccgagctcaacttcggaattgcatccg  
atactccgtgcttggagactggagaggagattggaattcacagtggagcagtgaaatgcgtagatatgtgaggaacactagtggcgaaggc  
gaatctctggacagttctgacgctgaggcacgaaaggccaggggagcaaacg

>47082eb92759c2179725fe69f11672c5

tggggaatcttgacaatgggcgaaagcctgatccagccatgccgctgcaggatgaaggccttcgggttgtaaactgctttgtacggaacgaa  
acggccttttctaataaagagggttaacgtacgggtaccgtaagaataagcaccggctaactacgtgccagcagccggttaatacgtagggtgca  
agcgttaatcgggaattactggcgtaaagcgtgcgagggcgttatgtaagacagttgtgaaatcccgggtcaactgggaactgcatctgtg  
actgcatagctagagtacggtagaggggatggaattccgctgtagcagtgaaatgcgtagatatgcggaggaacaccgatggcgaaggca  
atcccctggacctgtactgacgtcatgcagaaagcgtggggagcaaaaca

>483c89bebaf35922d7ed4d83f2471304

tgaggaaatcttgcgaatgggcgaaagcctgacagagcaatatcgctgagggaggaaggcctacgggttgtaaactcttttcaaggagga  
aactatgacgttacttgaggaataagcatcggctaaccctgtgccagcagccggttaatacaggggatgcaagtgttatccggaatcattggg  
cgtaaagcgtctgcaggctggccttttaagtctttgttaaagcttaggtcaacctagaaaatgcaaaggaaactaaaagccttgagtatggtg  
gaggtaaagggaattccagtggagcagtgaaatgcttagatatggaaagaacaccaacggcgaaaggcactttactgggccagcactgacgc  
tgagagacgaaagctaggggagcaaacg

>48574cce00abc6753c1e7b230012cfdc



tggggaatattggacaatgggggcaaccctgatccagcgacgccgctgtgtgaagaaggcctgcgggttgtaaagcacttttagtggggagg  
aaaagctcagacctaacacgtctgggaattgacttaacccaaagaaaaagcaccggctaactctgtgccagcagccgcggtatacagagggt  
gcgagcgttaatcgggaattactgggctgaaagcgtgcgttagacgggtatctaagtcgggtgtgaaatccccgggctcaacctgggaattgcattc  
gagactgaatagctaggggttcggaagagggaagcgggaatttcgggtgtagcgggtgaaatgcgtagatatcggaaggaacatcagtggcgaaa  
gcggcttcctggtccagaaccgacgttcaggcacgaaagcgtggggagcaaca

>492e2cc5c85859e2f98ec56452284e51

tggggaatattggacaatgggcggaagcctgatccagcaacgccgctgagggatgacggccttcgggttgtaaactctttcagtaccgacga  
agcgcaagtacggtaggtacagaagaagcaccggccaactacgtgccagcagccgcggtatacgtaggggtgcgagcgttgcggaattat  
tgggctgaaagggtcgtagcggtttgtcgcgtcgggagtgaaccaggtgcttaacacctggcttgccttcgatacgggcagactagaggta  
ttcaggggagaacggaattcctggtgtagcgggtgaaatgcgcagatatcaggaggaaacaccgggtggcgaaggcggttctctgggaatatcctg  
acgtgaggagcgaaagtgtggggagcgaaca

>497c2e1d6c8d903650af16a108d373a1

tggggaatattccgcaatgggcgaaagcctgacggagcgacgctgcgtgaaggatgacggcctgcgggttgtaaactcttttctgaagaaga  
ataaatgacggatttcgaggaataagcatcggctaactctgtgccagcagccgcggtgaagacagaggatgcaagtgtattcggattgattggg  
cgtaaagcgtctgtagcggtttggaagtctttgtgaaattcttcagctcaactgggggtccgcaaaagaaactttaggcttgagggaagta  
gaggtacaggggaatttcgggtggagcgggtgaaatgcgtagatatcggaaggaacaccaatatggcgaaggcactgtactgggctttacctgac  
gctaagagacgaaagctaaaggagtatta

>4a7a4813b0e0cac8daeb99b59edd44a6

tggggaatattggacaatgggcgaaagcctgatccagcaatgccgctgagtgatgaaggccttaggggttgtaaagctcttttaccgggatgat  
aatgacagtaccgggagaataagctccggctaactccgtgccagcagccgcggtatacggaggagctagcgttgcggaattactgggct  
aaagcgcacgtagcggtttgtaagttagagggtgaaagcctggagctcaactccagaattgcctttaagactgcatcgctgaatccaggaga  
ggtgagtggaattccgagtgtagagggtgaaattcgtagatatcgggaagaacaccagtggcgaaggcggtcactggactggtattgacgctga  
ggtgcgaaagcgtggggagcaaca

>4a7f867d55034fd3b2b4b28e0b1dda36

tggggaatattgcacaatgggcgaaagcctgatgcagcgacgccgctgagggatgacggccttcgggttgtaaactctttcagcagggacga  
agcgcaagtacggtagctcagaagaagcaccggctaactacgtgccagcagccgcggtatacgtaggggtgcaagcgttgcggaattac  
tgggctgaaagagttcgtagcggtttgtcgcgtcgtttgtgaaaccagcagctcaactgctggttcaggcgatacgggcagacttgagtac  
tgacggggagactggaattcctggtgtagcgggtgaaatgcgcagatatcaggaggaaacaccgggtggcgaaggcggttctctgggcagtaactg  
acgtgaggaaacgaaagcgtgggtagcgaaca

>4a8f14a41015a1bf6ee196eb3affbd56

tggggaatattgcgcaatgggcgaaagcctgacgcagccacgccgctgagcgatgaaggccttcgggtcgtaaagctctgtggggagagacg  
aagaaagccggtgaagagccggccttgacggtatctccttagcaagcaccggctaactccgtgccagcagccgcggtatacggagggtgcaa  
acgttgcctggaatcattgggctgaaagcgcacgtagcgggcgaagcaagttgggtgtgaaagccctgggctcaaccagggaagtgcattcaa  
aactgcttcgcttgaaatctcgaggggggtcagagaattcccggtgtagagggtgaaattcgtagatatcgggaggaataaccagtggcgaaggcgc  
tgacctggacgaagattgacgctgaggtgcgaaagcgcggggagcaaca

>4ac2359a61bc31e062026924341c6464

tggggaatattggacaatgggcgaaagcctgatccagcaatgccgctgtgtgaagaaggccttcgggttgtaaagcacttttgcggaaaga  
aatcctttgggttaatactcggggggatgacggtagcggaagaataagcaccggctaactacgtgccagcagccgcggtatacgtaggggtgc  
aagcgttaatcggaattactgggctgaaagcgtgcgcaggcggtttgtgaagcggatgtgaaatccccgggcttaacctgggaactgcattcgt  
gactgcaaggctagagtatggcagaggggggtagaattccacgtgtagcagtgaaatgcgtagagatgtggaggaataccgatggcgaaggc  
agccccctgggccaatactgacgctcatgcacgaaagcgtggggagcaaca

>4ad3ff35fcf6cc001d50d5e4a0cf1572

tggggaatattgcacaatggg'gcgaagcctgatgcagcaacgccgctgaggatgacggccttcgggttgtaaactcttttagtaaggaaga  
agccgcaaggtgacggtacttgcaaaaaagcaccggctaactacgtgccagcagccggtatactaggggtgcaagcgtgtccggaatt  
attgggcgtaaaagagctcgtagggcgtttgtcgcgtctgccgtgaaagcccagggtcaacctcgggtctgcggtgggtacgggcaggctagag  
tgcggtaggggagattggaattcctggtgtagcgggtggaatgcgcagatatcaggaggaacaccgatggcgaaggcagatctctgggccgtta  
ctgacgctgaggagcgaaagcatggggagcgaca

>4d93383d0d775f7979f2fbe804ff9997

tggggaattttgacaatggg'gcgaagcctgatccagccatgccgctgaggatgaaggccttcgggttgtaaactgctttgtacggaacgaa  
aagactctggttaatactgggggtccatgacggtaccgtaagaataagcaccggctaactacgtgccagcagccggtatactaggggtgca  
agcgttaatcggaattactgggcgtaaaagcgtgcgcagggcgttatataagacagatgtgaaatccccgggtcaacctgggaactgcatttgt  
gactgtatagctagagtagcggcagagggggatggaattccgcgtgtagcagtgaatgctgtagatatgcggaggaacaccgatggcgaaggc  
aatcccctgggcctgtactgacgctcatgcagaaagcgtggggagcgaaca

>4e38cc2c28e798a73bd2e6a218c04b37

tggggaatattggacaatggg'gcgaagcctgatccagccatgccgctgagtgatgacggccttaggggttgtaaagctcttttaccgggaagat  
aatgacggtaccgggagaataagccccggctaacttcgtgccagcagccggtatacgaagggggctagcgttgttcggaatcactgggcgt  
aaagcgcacgttaggcggtctttaagtcaggggtgaaatccccgggtcaacccgggaactgcctttgatactggggatctcaggttcgggaga  
ggtgagtggaactgcgagtgtagaggtgaaattcgtagatattcgcaagaacaccagtggcgaaggcggctcactggccgatactgacgctg  
aggtgcgaaagcgtggggagcgaaca

>4e40b0ab511cadfdacfa1caa47c851d5

tgagggaatttccgcaatggg'gcgaagcctgacggagcaataaccgctggaggatgacggcctgtgggtcttaaactccttttcttagagaaga  
agtctgacggtatctaaggaataagcatcggctaactccgtgccagcagccggtatacgggggatgcaagcgttatccggaatgattggg  
cgtaaaagcgtctgtaggtggctttcaagtcaactgtcaaaaatcagggcttaaccttgagccggcagttgaaactatgaagcttgagttaggta  
ggggcagaggggaattcctagtgtagcgggtgaaatgcgtagatattaggaagaacaccaatcgcgaaagcactctgctgggcatgactgacac  
tgagagacgaaagctaggggagcgaatg

>4eb7217a641476257c60a1b361649930

tgagggaatttccgcaatggg'gcgaagcctgacggagcaataaccgctgaaggattaaggcctatgggttgtaaactccttttctcagagaaga  
ttttgacggtatctgaggaataagcatcggctaactctgtgccagcagccggtataagacagaggatgcaagcgttatccggaatattgggcgt  
aaagcgtctgtaggtggttatcaagtttttgtcaaaagatcggggcttaactccgggcaggcagagaaaactagtagacttgagttcggtaggg  
gcagaggggaattccgggtggagcgggtgaaatgcgtagagatcgggaggaacaccaaaggcgaaggcactctgctgggccgcaactgacactg  
agagacgaaagcagggtagcaaatg

>4f11f4b7bc5241fa2c1a694d41089e41

tggggaatattgcacaatggg'gcgaagcctgatgcagccatgccgctgtgtgaagaaggccttcgggttgtaaagcactttcagtcgtgagga  
agggtgtagtgtaatagcactatcatttgacgttagcgacagaagaagcaccggctaactccgtgccagcagccggtatacggagggtgc  
gagcgttaatcggaattactgggcgtaaaagcgcacgcagggcgtttgttaagctagatgtgaaagccccgagctcaacttgggatggtcatttag  
aactggcagactagagtcttgagaggggagtggaattccagggtgtagcgggtgaaatgcgtagatatctggaggaacatcagttggcgaaggcg  
actcccctggccaaagactgacgctcatgtgcgaaagtgtgggtagcgaaca

>4f693533099e27dc7b6ed4f822145f4e

tgagggaatattgggcaatggaggcaactctgaccagccataaccgctgaagggaagactgtcctatggattgtaaactccttttatatgggaaga  
ataaggtctacgtgtagactgatgactgtaccatatgaataaggaccggctaactccgtgccagcagccggtatacggagggttcaagcgt  
tatccggatttattgggtttaaagggtccgtagggcgtactaataagttagtggtgaaatcctatagctcaactatagaactgccattgaaactgtt

agtcttgaattatttgggaagttggcggaatgagtagttagcggtgaaatgcatagatattactcagaacaccgattgcgaaggcagctgactac  
gaatatattgacgctgatggacgaaagcgtaggtagcgaaca

>51dc7031d4636e88142b59059317de39

tggggaatattggacaatgggcgcaagcctgatccagccatgccgcgtgagtgatgaaggccttagggttgtaaagctctttcagtagggaaga  
taatgacggtactacagaagaagccccggctaacttcgtgccagcagccgcggtaatcgaagggggctagcgttgttcggatttactgggcg  
taaagcgacgtaggcggtatcgtaagtacgggtgaaatcctggagctcaactccagaactgcctttgatactggcgatctcgagtcggaag  
aggtagtggaactcctagtgtagaggtggaattcgtagatattaggaagaacaccagtggcgaaggcggctcactgggtccggaactgacgct  
gaggtgcgaaagcgtggggagcaaaca

>5275d0e6bbcef9e6101af982907cf88a

tagggaatcttccgaatgggcgaaagcctgacggagcaacccgcgtgagtgattaaggtcttcggatcgtaaaactctgttattaggaaga  
acaaatgttaagtaactatgcagctttgacggtaactacagaagccacggctaactacgtgccagcagccgcggtaatcgtaggtggc  
aagcgttatccggaattattggcgtaaagcgcgctagcggtttttaagctctgatgtgaaagcccacggctcaaccgtggagggtcattgga  
aactggaaaacttgagtgcagaagaggaaagtgaattccatgtgtagcggtgaaatgcgcagagatatggaggaaacaccagtggcgaaggc  
gactttctggtctgtaactgacgctgatgtgcgaaagcgtggggatcaaaca

>528a228f1a944feaa9c9cddfd2f57b6

tagggaatcttccgaatggacgaaagtctgacggagcaacccgcgtgatgaagaaggttttcggatcgtaaaactctgtttagagaaga  
acaaggataagagtaactgttgccttgacggatcttaaccagaagccacggctaactacgtgccagcagccgcggtaatcgtaggtggc  
aagcgttatccggaattattggcgtaaagcgcgcgaggcggtcttttaagctctgatgtgaaagccccggcttaaccggggagggtcattgga  
aactggaagactggagtgcagaagaggagagtggaattccacgtgtagcggtgaaatgcgtagatatgtggaggaaacaccagtggcgaaggc  
gactctctggtctgtaactgacgctgagggc

>53b7dfa9f189c44ffda0eef1a1c9f53d

tgaggaaatcttgcgaatgggcgaaagcctgacagagcaataccgcgtgggggatgaagacttactgagttgtaaacctcggtaccctaaggaa  
gaagatatgacggtacttagggtggaaagcatcggttaactccgtgccagcagccgcggttaagacgggggatgcaagtgttatccgatttact  
ggcgtaaagcgtctgcaggtggtttcttaagtctactgttaaatcttgaggctcaacctcaaatctgcagtagaaactaggagacttgagtatag  
taggggtagagggaatttccagtgagcggtgaaatgcgtagatattggaaagaacaccgatggcgaaggcactctactaggctattactgac  
actcagagacgaaagctaggggagcaaatg

>541e8d9ee02a46b74c3adeca6a36491d

taaggaaatattggtcaatggagggaactctgaaccagccatgccgcgtgcaggatgaaagccctctgggtgttaaactgcttttaacagggaag  
aaaatgtatactgatatagtactgacggtacctgaggaataagcaccggctaactccgtgccagcagccgcggttaatacggagggtgcaag  
cgttatccggaatcactgggtttaaagggtgcgtagcggttttataagtcagtggtgtaaagggttagctcaactataagagggtccattgatact  
gtaagactgaaatcgagttgaggttgccggaatgagacatgtagcggtgaaatgcttagatatgtcatagaacaccaattgcgaaggcagctga  
ctagacttagattgacgctgaggcacgaaagtgtgggtagcgaaca

>541f6821e5035ab2d63c16fa681bf389

tggggaatattggacaatgagcgaaagcctgatccagcaatatcgcgtagtgaaagaaggctattttggtgttaaactctttcgtcgaggaaga  
taatgacggtactcgaagaagaagccccggctaactccgtgccagcagccgcggttaagacggagggggctagtgatttcggaattactgggc  
gtaaagggcacgtaggctgtgaattaagtgaagtgaatccaaagcttaactttggaactgttttcaaaactgattcactagagttcaatag  
gggtagtggaatttctagttagaaattaaattcttaaatattagaaggaaacaccagtggcgaaggcgactatctggattgatactgacgctaa  
ggtgcgaaagcatggggagcaaata

>5497318e515a8c328a68f95975d9c7d4

tagggaatcttccgaatgggcgaaagcctgacggagcaaccccgctgagtgatgaaggcttccgcatcgtaaaaactctgttattaggaaga  
acaaatgtgaagtaactatgcacgtcttgacggtaactacagaaagccacggctaactacgtgccagcagccggttaacgtaggtggc  
aagcgttatccggaattattgggcgtaaagcgcgcgtgagcggtttttaagctctgatgtgaaagcccacggctcaaccgtggagggtcattgga  
aactggaaaaacttgagtgcagaagaggaaagtggaattccatgtgtagcggtgaaatgcgcagagatatggaggaaacaccagtggcgaaggc  
gactttctggtctgtaactgacgtgatgtcgaaagcgtggggatcaaaca

>552f110db8d39cc665101679623fa17d

tggggaatcttgacaatgggcgcaagcctgatccagccatgccgctgagtgatgaaggccctagggtcgtaaagctctttccgagagatga  
taatgacagtatctggtaaagaagtcgggtaactccgtgccagcagccggttaacgaggggactagcgttgttcggaattactgggcg  
taaagcgcacgtagcggtatcagaaagtatggggtgaaatcccagggtcaaccctggaactgcctataaactcctggtctagagttcgagag  
aggtgagtggaattccgagtgtagaggtgaaattcgtagatatccggaggaaacaccagtggcgaaggcggctcactggctcgatactgacgtg  
aggtgcgaaagtgtggggagcaaaca

>56104f48457981616f041d0577c26179

tggggaatattgcacaatgggcgaaagcctgatgcagcgacccgctgagggatgacggccttcgggttgtaaactctttcagcagggag  
aagcgaaagtgcaggtacctgcagaagaagcaccggctaactacgtgccagcagccggttaacgtaggggtgcgagcgtgtccggaatta  
ttgggctgaaagactttaggcggtttgtcgctctgcagtgaaaatccgagggtcaacctcggacttgctgtgggtacgggcagactagagta  
tggtaggggagaccggaattcctggttagcggtggaatgcgcagatatcaggaggaaacaccgatggcgaaggcaggtctctgggccataact  
gacgtgagaagcgaaagcatggggagcgaaca

>5760c84ea88c18318e8e806996fb4d51

tggggaatattggacaatgggcgaaagcctgatccagcaatgccgctgggtgaagaaggcctcggggttgtaaagccctttcagccgggagg  
aaaagcatcgggctaatatctcgtatgtcttgacgttaccggcagaagaagcaccggctaactccgtgccagcagccggttaacgagggtg  
cgagcgttaactcgaattactgggcgtaaagcgcgtatgagcggcgggataagtcgagtgtaaaaacccgggtcaacctgggaattgcatcc  
gatactgttccgctagagtcgttagagggaggcggaattcccgggttagcggtgaaatgcgtagatatcggaggaaacaccagtggcgaagg  
cggcctctggaccaagactgacgtgaggtgcgaaagcgtggggagcaaaca

>5796a8941308656f11cee5f298cfa4cd

ttaggaatattggacaatgggggcaaccctgatccagccatgccgctgtgtgaagaaggccttaggggttgtaaagcactttcggctgtgaagat  
aatgacagtagcagaagaagaagctccggctaattcgtgccagcagccggttaacgaatggagcagcgttgttcggaatcactgggcg  
taaagcgtgcgcagcggtcttgaaagttaggagtgaaatcccagggttaaccttggaattgctcttgaaactccaagactagagtactggag  
aggttggcggaatttcgagtgtagcagtgaaatgcgtagatatcgaaggaaacaccgatggcgtaggcagccaactggacagttactgacgtc  
atgcacgaaagcgtggggatcaaaca

>586a580e56cf02c4b815e0d30cb1e230

tggggaattttccgattgggcgaaagcctgacggagcaatgccgctggaggtagaaggccacgggtcatgaactcttttccggagaaga  
agcaatgacggatatctggggaataagcatcggttaactctgtgccagcagccggttaacagaggatgaggcgttatccggaatgattggg  
cgtaaagcgtctgtaggtggcttttaagtcggtcaaatcccagggtcaactctggacagcggtggaaactaccaagctggagtacggta  
ggggcagagggaatttcgggtggagcggtgaaatgcgtagagatcggaagaacaccaacggcgaaagcactctgctgggcccgaactgaca  
ctgagagacgaaagctaggggagcgaatgggattagataccctgtagt

>58c6e137a2022dfbdf30c2f2ef5949c4

tagggaatattggacaatgggcgaaagcctgatccagcaataccatgtgagtgatgaaggctatttaggtgtaaagcttttcatcgaggag  
ataatgacggtagtcgaagaagaagccccggctaaccctgtgccagcagccggttaagacaggggggtagtgatttccggaatgactggg  
cgtaaagggtgcgtagcggttaaataaagtgaaggtgaaatccaaagcttaactttggaaatgcgttcaaaactaatttactggagtatgat  
agaggatagtggaatttctagttagagatagaattcgaaagattagaaggaacaccagtggcgaaggcgactatctggatcaatactgacg  
ctgaggcacgaaagcatggggagcaaacg

>58f3b1137cd96451070ebfeacf4c937c

ccgcggaatacacagatggggcaagtgttattcgggaatgattgggcgtaaagggtacgtaggtggtttattagtcagttgtcacaaccttttaga  
aaagaatcgagctttaaaagactacaaaacttgagtttgatagaggaaagcggaattttgagtgagagatagaattcatagatattcaaagg  
aacaccgaaaacgaaggtagctttctgggtcaacactgacgctcatgtacgaaagcatggggagtaaag

>59835154e1b1073cb003929fd7684a91

taaggaatccccgcaatggggcgaagcctgacggagcaataccgcgtgaaggatgacggcccatgggtgttaaacttctttcttgagaaga  
attctgacggtatccaaggaataagcatcggctaactccgtgccagcagccgcggtgaagacgggggatgcaagcgttattcggaattattgggc  
gtaaagcgtctgtaggtggtaggaaagtgtttgttaaagatcagggcctaaccctgggaaagcagagcatactatctcacttgagttcggtag  
gggcagagagaattccagtgtagcggtgaaatgcgtagatattgggaggaagaccggtggcgaaggcgttctgctgggccgtaactgacact  
gagagacgaaagctaaggggagcaaata

>59aa8c6b152a2caf743a16c5cdaf4144

tggggaatccccgcaatggggcgaagcctgacggagcaatgccgcgtggaggtagaggccctgggtcatgaacttctttccggagaagaa  
aaaatgacggtatccggggaataagcatcggctaactctgtgccagcagccgcggtgaagacagaggatgcaagcgttattcggaatgattggg  
cgtaaagcgtctgtaggtggccttttaagttcgtgtcaaataaccagggcccaaccctggacaggtggtgaaaactactaagctagagtacggt  
ggggcagagggaattccggtggagcgatgaaatgcgtagagatcggaaggaacaccaacggcgaaagcactctgctgggccgacactgaca  
ctgagagacgaaagctaggggagcgaatg

>5a8f0b46a094391e9436f875639034e9

tagggaatcttcggaatggacgaaagtctgaccgagcaacgccgcgtgagtgaagaaggttttcggatcgtaaaactctgtttagagaaga  
acaagtgggagagtaactgttccgccttgacggtatctaaccagaaagccacggctaactacgtgccagcagccgcggtatacgtaggtggc  
aagcgttgcggatttattgggcgtaaagcgagcgaggtggttctttaagctgatgtgaaagcccccggtcaaccggggagggtcattgga  
aactggggaacttgagtgcagaagaggagagtgaattccatgtgtagcggtgaaatgcgtagatatatggaggaacaccagtggcgaaggc  
gactctctggtctgtaactgacactgaggctcgaaagcgtggggagcaaca

>5aba2d48a9999d2a3b9c07f1465e84b7

tagggaatcttcggaatggacgaaagtctgacggagcaacgccgcgtgtatgaagaaggttttcggatcgtaaaactctgtttagagaaga  
acaaggataagagtaactgttgccttgacggtatctaaccagaaagccacggctaactacgtgccagcagccgcggtatacgtaggtggc  
aagcgttgcggatttattgggcgtaaagcgcgcgagggcgttctttaagctgatgtgaaagcccccggtcaaccggggagggtcattgga  
aactggaagactggagtgcagaagaggagagtgaattccacgtgtagcggtgaaatgcgtagatatgtggaggaacaccagtggcgaaggc  
gactctctggtctgtaactgacgtgaggctcgaaagcatgggtagcgaaca

>5b6b170276b8ef352f78beb0f0e0fe73

tgaggaatccccgcaatggggcgaagcctgacggagcaataccgcgtggaggatgacggcctgtgggtcttaaactcctttcttagagaaga  
agttctgacggtatctaaggaataagcatcggctaactccgtgccagcagccgcggtatacgggggatgcaagcgttattcggaatgattggg  
cgtaaagcgtctgtaggtggccttccaagtcaactgtcaaaaatcagggcctaacttgagccggcagttgaaactatgaagcttgagttaggt  
ggggcagagggaattcctagtgtagcggtgaaatgcgtagatattaggaagaacaccaatcgcgaaagcactctgctgggccatgactgacac  
tgagagacgaaagctaggggagcgaatgggattagataccccagtagt

>5cf49312cbe55402c4efc855e881ec8a

tggggaattttgacaatggggcgaagcctgatccagccatgccgcgtgcaggatgaaggccttcgggtgttaaactgctttgtacggaacgaa  
aagactccttctaataaaggagtcctgacggtaccgtaagaataagcaccggctaactacgtgccagcagccgcggtatacgtaggtgac  
aagcgttaactcggaattactgggcgtaaagcgtgcgcagggcgttatataagacagatgtgaaatccccgggctcaacctgggaactgcatttg  
tgactgtatagctaggtacggcagagggggatggaattccgcgtgtagcagtgaaatgcgtagatatgcggaggaacaccgatggcgaaggc  
aatcccctgggcctgtactgacgctcatgcagaaagcgtggggagcaaca

>5f11c3c0d2d5759a9d51de131b9cf5c8

tggggaatattgcacaatgggcgcaagcctgatgcagccatgccgcgtgtgtgaagaaggccttcgggttgtaaagcactttcagcgaggagga  
aaggttagtcgctaataatcggctagctgtgacgttactcgagaagaagcaccggctaactccgtgccagcagccgcggtataacggagggtgc  
gagcgttaatcggaattactgggcgtaaagcgtacgcagggcgccatttaagtcagatgtgaaagccccgggctcaacctgggaactgcatttg  
aaactggatggctagagtgcgacagagggtggtagaatttcaggtgtagcggtgaaatgcgtagagatctgaaggaataccaatggcgaaggc  
agccacctgggtcgacactgacgctcatgtacgaaagcgtgggtagcaaca

>5f7382f2d1a279b491bfe682e999d41b

tggggaatccccgcaatgggcgaaagcctgacggagcaatgccgcgtgaaggcagaaggcccacgggtcatgaactctttctcggagaaga  
aaaaatgacggtatctgaggaataagcatcggtactctgtgccagcagccgcggttaagacagaggatgaagcgttatccggaatgattgg  
gcgtaaagcgtctgtagtggttttcaagtcgccgtcaaataccccgggctcaacctggacaggcagtggaactaccaagctggagtacgg  
taggggcagagggaatccccggtggagcggtgaaatgcgttgagatcggaagaacaccaacggcgaaagcactctgtgggccgacactga  
cactgagagacgaaagctaggggagcaaatg

>5f8b99d96b9fb65e12c944b3f8bd38b9

tggggaattttgacaatgggcgaaagcctgatccagcaatgccgcgtgtgtgaagaaggccttcgggttgtaaagcacttttgcggaaaga  
aatccttggctctaatacagtcgggggatgacgggtaccggaagaataagcaccggctaactacgtgccagcagccgcggtataacgtagggtg  
cgagcgttaatcggaattactgggcgtaaagcgtgcgcagggcggtttgtaagaccgatgtgaaatccccgggctcaacctgggaactgcattg  
gtgactggcaggctagagtatggcagaggggggtagaattccacgtgtagcagtgaaatgcgtagagatgtggaggaataccgatggcgaag  
gcagccccctgggccaatactgacgctcatgcacgaaagcgtggggagcaaca

>603311b987d30368539611fdb617a67a

tggggaatcttagacaatgggggaaacctgatctagccatgccgcgtgatcgatgaaggccttaggggttgtaaagatctttcagatgggaaga  
taatgacgggtaccatcagaagaagccccggctaactccgtgccagcagccgcggtataacggagggggtagcgttattcggaaattactgggcg  
taaagcgcacgtagcggtatggatgtggaggtgaaatcccagggtcaaccttggaactgccttcaaaacttcagctcttaggtcgagag  
aggtaagtggaaattccgagtgtagaggtgaaattcgtagatattcggaggaacaccagtgggcgaaggcggcttactggctcgatactgacgctg  
aggtgcgaaagcgtggggagcaaca

>61307d86c31f81363b2727ec24b3ca6a

tggggaatattgcacaatgggcgcaagcctgatgcagccatgccgcgtgtgtgaagaaggccttaggggttgtaaagcactttcagttgggagga  
aagctttagattaatactctataagtgtagcgttaccaacagaagaagcaccggctaactccgtgccagcagccgcggtataacggagggtgc  
aagcgttaatcggaattactgggcgtaaagcgacgtaggtggtttgttaagttggatgtgaaagccccgggctcaacctgggaactgcacca  
aaactggcaaactaggtacggtagaggtgagtggaatttcctgtgtagcggtgaaatgcgtagagatgggaaggaacatcagtggcgaaggc  
gactcactggactgatactgacactgaggtgcgaaagcgtgggtagcaaca

>61de4bf54c5a7ce590210959e2d93ed7

tgaagaatattaggcaatgcacgaaagtgtgacctatcgaattagcggaaatgaagaaggctacagtagccgtaaagttatacgtgtacaag  
aattatgatttgatgtacaaagagaagtcagtgcaatacaggtgccagcagccgcggtataacctgagtgacgagcattattcgcaataactg  
ggtgtaaaggatgtgtaggaaattttaaaaaatgactgactaaattctcggcaagatgggctttcggtttttataaatatttgagtatctatagag  
agttggggtgtgtctaaatagtataaaatactaaaatttagccattcttgccgattgtataagtaacgattcttataggttctgactctgaaacat  
caaagtaagggaataaaca

>62f1ba162f9bb059bc3045f13179dba2

tggggaattttgacaatggacgcaagtctgatccagcaataccgcgtgcaggacgaaggccttcgggttgtaaactgcttttgacggaacga  
aaagccttcttctaatacaggggaggtcatgacgggtaccgtaagaataagcaccggctaactacgtgccagcagccgcggtataacgtagggtgc  
aagcgttaatcggaattactgggcgtaaagcgtgcgcagggcggttgtgtaagacaggtgtgaaatccccgagctcaacttgggaattgcattgt

gactgcacagctagagtacggcagaggggatggaattccgcgtgtagcagtgaatgcgtagatatgaggaggaacaccgatggcgaaggc  
aatcccctgggcctgtactgacgctcatgcacgaaagcgtggggagcaaaca

>64bf18c8572c61680370cfbaf7ac793

tggggaatattggacaatgggggcaaccctgatccagccatgccgcgtgagtgtgaaggccttaggggtgtaaaactctttgtccgggaagat  
aatgactgtaccggaagaataagccccggctaactcgtgccagcagccgcggtgaatacgaagggggtagcgtgttcggaatcactgggcgt  
aaagcgcacgtaggcggatcgttaagtcagaggtgaaatcccggagctcaacttcggaactgcctttgatactggcgtatctcaggtttggaaga  
ggttggtggaactgcgagtgtagaggtgaaatcgttagatatcgaagaacaccagtggcgaaggcggccaactggtccaatactgacgctga  
ggtgcgaaagcgtggggagcaaaca

>64dda94b15ad63e3875ea5a8b3ab84f2

tggggaatcttgacaatggggcgaagcctgatgcagaaacgccgcgtgcgggaagaaggcccttaggggtgtaaacgctttcagcaggggaag  
aaactgacgggtacctgtagaagaaggtgcggccaactacgtgccagcagccgcggtgacacgtaggaccaagcgtgtccggatttattgggc  
gtaaaagctcgtaggcgggttcggtaagtcgggtgtgaaaactctgggctcaaccagagccgccacctgatactgctgtgactcagtgcggt  
aggggagcggggaattcctggtgtagcgggtgaaatgcgcagatatcaggaggaacaccagtggcgaaggcgcgctctgggccgtgactgac  
gctgaggagcgaagcgtgggttagcaaaca

>66fac4b9efc92db4607478d36ae09336

tggggaatcttcgcaatggggcgaagcctgacggagcaatgccgcgtggaggtggaaggcctacgggtcgtcaacttctttctcgagaaga  
aacaatgacgggtatctgaggaataagcatcgggtaactctgtgccagcagccgcggtgaacagaggatgaagcgttatccggaatgattgg  
gcgtaaagcgtctgtaggtggcttttaagtcgccgtcaaatcccagggtcaaccctggacaggcgggtggaactaccaagctggagtacgg  
taggggcagaggggaatttcgggtggagcgggtgaaatgcattgagatcggaagaacaccaacggcgaaagcactctgctgggccgacactga  
cactgagagacgaaagctaggggagcaaatgggattagataccctagtag

>671bca4fd9d9a534f5ef9ca36254bc3e

tgaggaatattggtcaatggaggcaactctgaaccagccatgccgcgtgaaggatgaaggcctctggattgtaaaactctttatagaagaaga  
aaccccggtattctaccgggttgacggtactctatgaataagcaccggctaactccgtgccagcagccgcggtgaatacggagggtgcaagcgt  
atccggttactgggtttaaaggagcgttaggtgggttgtaagtcagtggtgaaatctccgagcttaacttggaactgccattgatactacc  
agtctgaatactgtggaggtgaagcggaaatgtcatgtagcgggtgaaatgcttagatatgacatagaacaccgatagcgaaggcagcttacta  
cgcagttattgacactgaggctcgaagcgtggggatcaaaca

>6767886def9f21be29cee68e507a353d

tggggaatcttcgcaatggggcgaagcctgacggagcaatgccgcgtggaggtagaaggccacgggtcatgaacttctttccggagaaga  
agcaatgacgggtatctggggaataagcatcgggtaactctgtgccagcagccgcggtgaatacagaggatgaagcgttatccggaatgattggg  
cgtaaagcgtctgtaggtggcttttaagtcgccgtcaaatcccagggtcaactctggacaggcgggtggaactaccaagctggagtacggta  
ggggcagaggggaatttcgggtggagcgggtgaaatgcgtagagatcggaagaacaccaacggcgaaagcactctgctgggccgacactgaca  
ctgagagacgaaagctaggggagcgaatgggattagatacccggtagt

>6809485884cd95bf31581d0154e0e253

tagggaatcttcgcaatggacgaaagtctgacggagcaacgccgcgtgagtgaagaagggttttcggatcgtaaaactctgttgcagagaaga  
acaagttggagagtaactgctccagccttgacgggtatctgaccagaaagccacggctaactacgtgccagcagccgcggtgaatacgtaggtggc  
aagcgttgcggatttattgggcgtaaaagcagcgcaggcgggttccttaagtctgatgtgaaagccacggctcaaccgtggaaggctcattgga  
aactggggaacttgagtgcagaagaggagagtggaattccatgtgtagcgggtgaaatgcgtagatatggaggaacaccagtggcgaaggc  
gactctctggtctgtaactgacgctgaggctcgaagcgtggggagcaaacaggattagatacccggtagt

>68aad407f0c22f8c9afaa4863447f51f

tggggaatattggacaatgggcgcaagcctgatccagcaatgccgctgggtgaagaaggcctgcgggttgtaaagccctttaagcggggagg  
aaagccggggcgtcaatagcgctcggggtgacgttaccgcagaataagcaccggctaactccgtgccagcagccgcggtatacggggggt  
gcgagcgttaatcggaattactgggcgtaaagcgtgcgttaggcggcgcaatcagtcagccgtgaaagccccgggcttaacctgggaatggcgg  
ttgagacggttgggctagagtgggctagaggatcgtggaactcccgtgtagcggtgaaatgcgtagagatcgggaagaacaccgatggcgaa  
ggcagcggctcggggccacactgacgtgaggcacgacggcgtggggagcaaaca

>68bb6d5696f465d5ac396c7a6ada0250

tggggaatattgcacaatgggcgaaagcctgatgcagcgacccgcgtgagggatgacggccttcgggttgtaaaccttttcagcaggggaag  
aagcgaaagtgcggtacctgcagaagaagcaccggctaactacgtgccagcagccgcggtatacgtagggtgcgagcgtgtccggaatta  
ttgggcgtaaagacgtttaggcggtttgtcgcgtctgctgtgaaaatccggggctcaacccggacctgcagtgggtacgggcagactagagta  
tggtaggggagactggaattcctggttagcggtgaaatgcgcagatatcaggaggaacaccgatggcgaaggcaggtctctgggccattact  
gacgtgagaagcgaaagcgtggggagcaaaca

>6906ec2c3e825267f53731bc296b3c83

tagggaatcttcggcaatggacgaaagtctgaccgagcaacgccgctgagtgaagaaggttttcggatcgtaaaactctgtttagagaaga  
acgttgcatagagtggaaaattatgcaagtgcggtatctaaccagaaagggacggctaactacgtgccagcagccgcggtatacgttaggtc  
ccgagcgttgtccgatttattgggcgtaaagcgagcgaggtggtttaataagctgtatgtaaaaggcaatggctcaaccattgtgtcattgg  
aaactgttagacttgagtgcagtagaggagagtgaattccatgtgtagcggtgaaatgcgtagatatatggaggaacaccgggtggcgaaagc  
ggctctctggactgtcactgacactgaggctcgaaagcgtgggtagcaaaca

>6af34a43ea7caf29692704560fe79591

tggggaatattggacaatggggggaaccctgatccagcaatgccgctgtgtgaagaaggcctgagggttgtaaagcactttcgggtggggagg  
agtatatataggttaagactaatatagtagcgttaccacataagaagcaccggctaactccgtgccagcagccgcggtatacggagggtg  
cgagcgttaatcggaattactgggcgtaaaggggtgcgtaggttgttgaatgaatctgtataaatccctgggctcaacctgggcaggtcagata  
agactgattgactcgagtataggagagggtagtgaattccgggtgtagcggtgaaatgcgtagagatcggaaggaacaccagtggcgaaggc  
ggctacctggcctaatactgacactgaggcacgaaagcgtggggagcaaaca

>6bb7141e0deafcdada8a68f197aced90

taagggaatattggtcaatggaggcaactctgaaccagccatgccgctggaggatgaaggtcctctggattgtaaactcttttatatgggacga  
aaaaaggcttttctaagtcgtctgacggtaccatatgaataagcaccggctaactccgtgccagcagccgcggtatacggagggtgcaagcgt  
tatccggattcactgggtttaaaggggtgcgtaggtgggttggtgaagtgcgtggtgaaatccccgagcttaactgggaactgccattgatactatc  
agtcttgaataccgtggagggtcggcggaatatgtcatgtagcggtgaaatgcttagatatgacatagaacaccaattgcgaaggcagctgacta  
cgcggatattgacactgaggcacgaaagcgtggggatcaaaca

>6bf4208c1176bb483ed245f86e785152

tagggaatcttcgcaatggacgaaagtctgacggagcaacgccgctgtatgaagaaggttttcggatcgtaaaagtactgtttagagaaga  
acaaggataagagtaactgctgtcccttgacggtatctaaccagaaagccacggctaactacgtgccagcagccgcggtatacgttaggtggc  
aagcgttgtccgatttattgggcgtaaagcgcgcgaggcggctctttaagtctgatgtgaaagccccgggcttaaccggggagggtcattgga  
aactggaagactggagtgagaagaggagagtggaattccacg

>6c01b8d12dfe4a4f4280aacc621cc031

ccgcggtatactaggtggcaagcgttgtccgatttattgggcgtaaagcgagcgaggcgggttccttaagtctgatgtgaaagcccacggct  
caaccgtggaaggtcattggaaactggggaacttgagtgcagaagaggagagtggaattccatgtgtagcggtgaaatgcgtagatatatgga  
ggaacaccagtggcgaaggcgactctctggtctgtaactgacgctgaggctcgaaagcgtggggagcaaaca

>6d65fe9936fdb9933802a695f197070b



tggggaatccccgcaatgggcgaaagcctgacggagcaatgccgctggaggtagaaggccacgggtcatgaacttctttcccggaagaag  
agcaatgacggtatctggggaataagcatcggctaactctgtgccagcagccgcggtatacagaggatgcaagcggtatccggaatgattggg  
cgtaaagcgctctgtaggtggccttttaagtccgctcaaataccagggtcaactctggacagcggtggaaactaccaagctggagtacggt  
ggggcagagggaatccccggtggagcggtgaaatgcgtagagatcggaagaacaccaacggcgaaagcactctgctgggccgacactgaca  
ctgagagacgaaagctaggggagcgaatgggattagataccccagta

>6dd8bd7675b56fedc7f1d860167f412f

tggggaatccccgcaatgggcgaaagcctgacggagcaatgccgctggaggtagaaggccacgggtcatgaacttctttcccggaagaag  
aagcaatgacggtatctggggaataagcatcggctaactctgtgccagcagccgcggtattacagaggatgcaagcggtatccggaatgattgg  
gctaaagcgctctgtaggtggccttttaagtccgctcaaataccagggtcaactctggacagcggtggaaactaccaagctggagtacggt  
aggggcagagggaatccccggtggagcggtgaaatgcgtagagatcggaagaacaccaacggcgaaagcactctgctgggccgacactgac  
actgagagacgaaagctaggggagcgaatg

>6e16693f910b8be9b45277bd0d4dd9a4

tggggaatattggacaatgggcgaaagcctgacggagcaatctcgtgtgagggttagtctcgtgagggacggaaagtctacggattgtaaac  
ctctttttcagggaggaatacaatgacgtgtatctgaagaataagcatcggctaactccgtgccagcagccgcggttaagacggaggatgcaag  
tgttatccggaattattggcgtaaaagcgttttaggttggttaaataagtcaattgttaaacttgaagcttaacttaaaattgcaatcgaacta  
ttagactagagtatagtaagggtaacaggaatcttcagtgagcggtgaaatgtgtagatattgaaaggaacatcagtggcgaaagcgttttact  
aggttaatactgacactcagaaactaaagctaggggagcaaatg

>6ec88afe9afac2ae5e39a2d96b638d3

tggggaatattgggcaatgggcgaaagcctgacccagcaataccgctgagtgatgaaggctcgaagattgtaaaactctttattagagaaga  
ttatgacggtatctaataaggactgactaactctgtgccagcagtcgcggtatacgaagagccaagcgttactcggaatcactgggcgt  
aaagaatgcgcaggctgttttgaagtgtataatgaaataccggagcataactcgggtgctgttatcaaaactgcaagactagagtttgtaggg  
gatgatggaatcttttggttaggggtaaaatcctttgatataaaaggaaacgccggaggcgaaagcgatcatctgggccaatactgacgctcat  
gcatgacagcgtggggagcaaaaca

>6ecf0411e6cb2404165d7fb96db6c238

tagggaatctccgcaatggacgaaagtctgacggagcaacgccgctgtatgaagaagggtttcggatcgtaaagtactgtttagagaaga  
acaaggataagagtaactgcttgccttgacggtatctaaccagaaagccacggctaactacgtgccagcagccgcggtatacggagggtgc  
aagcggtatccggaatcactgggtttaaagggtgcgtaggtgggctaataagtcagaggtgaaagcccgagcttaactcggaattgcctttga  
tactgttagtcttgaatcaggttaggtatgcggaatgtggcatgtagcggtgaaatgcgtagatatgccatagaacaccgattgcgaaggcagc  
atactggccctgtattgacactgaggcacgaaagcgtggggagcgaaca

>6f87dd84cb1ce4668e15e837607db316

tagggaatctccgcaatggacgaaagtctgacggagcaacgccgctgtatgaagaagggtttcggatcgtaaagtactgtttagagaaga  
acaaggataagagtaactgcttgccttgacggtatctaaccagaaagccacggctaactacgtgccagcagccgcggtatacgtagggtgc  
gagcgttaatcggaattactgggcgtaaaagcgtgcgcaggcggttgttaagacaggtgtgaaatccccgggcttaacctgggaactgcgcttgc  
gactgcacagctagagtacggcagaggggggtggaattccacgtgtagcagtgaaatgcgtagagatgtggaggaacaccgatggcgaaggc  
agccccctgggcctgtactgacgctcatgcacgaaagcgtggggagcgaaca

>70e6f31afa70525ebbeb0bce77ba2121

tagggaatctccgcaatggacgaaagtctgacggagcaacgccgctgagcgaagaaggctctcggatcgtaaagctctgtgtcagggaa  
aacaagtaccgttcgaacagggcggtaccttgacggtacctgaccagaaagccacggctaactacgtgccagcagccgcggtatacgtagggt  
ggcaagcgttgtccggaattattgggcgtaaaagcgcgcgaggcggtctcttaagtctgatgtgaaagccacggctcaacctggaggggtcatt  
ggaaactgggagacttgagtgcagaagaggagagcggaattccacgtgtagcggtgaaatgcgtagagatgtggaggaacaccagtggcgaa  
ggcggctctctggtctgtaactgacgctgaggcgcgaaagcgtggggagcgaaca

>7216595d94ee0859ec044530c2b70c7f

tggggaatcttcgcaatggggcggaagcctgacgcagcgacccgctgagggatgacggccttcgggttgtaaactctttcagcaggggaag  
aagcggaagtgcggtacctgcagaagaagcaccggctaactacgtgccagcagccggttaatacgtaggggtgcaagcgtgtccggaatta  
ttgggcgtaaagagctcgtagggcgtctgtcgctctgtgtgaaaacttcgggctcaacccgaagctggcagtggggtacgggcggactggagt  
gcagtaggggagactggaattcctgggttagcggtgaaatgcgcagatatcaggaggaaacaccgggtggcgaaggcgggtctctgggctgttac  
tgacgctgaggagcgaaagcgtggggagcgaaca

>731fbab381606c13d39053eb1c805648

tgaggaatattcggaatgggggcaaccctgaccgagcaacccgctggaggatgacggtttcggattgtaaactcctttctcaggggaaga  
gcgaggacgggtacctgaggaataagtcacggctaactacgtgccagcagccggttaatacgtaggtggcaagcgttatccggaattactggg  
cgtaaagcgacgcaggtggctgcttaagtctgacgtgaaagctcctggcctaactgggagaggtcgttggaactgggcggcttgaggcgagg  
agaggggtgtagaattcccgggtgtagtggtggaatgcgtagagatcgggaggaataccagtggcgaaagcggcacccctggccttgacctgacg  
ctcaggtgcgaaagcgtggggagcgaacg

>735afa4d80e8c4aa9906b0445ef9e9a6

tgaggaatattggacaatgaacgtaagttgatccaacaatattgctttggtgaagaaaattaattttgtaaaaccatacttaatttaaagataat  
gacataaaatttaagtaagtcctgactaatttctgtccagcagtcgcggtgatacggaaaggacaagtggtatttgatttaactgggtgtaaagt  
tgtgtagatgattaaaataataaaaaaaaaaattattttttaataattaattttattatatttttaatttgagttatagtgtagtttcagaa  
ctttaagtgtagaggtaaaattcttaaaaatttaaggtactttcaagaaggtgaaaacagcatgctaattataaactgacattgaagcacaaaaag  
cataggtatcaaatg

>73966f8498e3223dfb1b3af2d7856de0

tgaggaatattggacaatggggcgcaagcctgatccagccatgccgctgcaggatgaagcatctatgggtgttaaactgctttgtacgagaag  
aaactgcttctgaagcagctgacggtatcgtaagaataaggatcggttaactccgtgccagcagccggttaatacggaggatccaagc  
gttatccggaatcattgggtttaagggtccgtaggcgggccaagtaagtcagtggtgaaatctccggctcaaccgggaaatggccattgatact  
gctggtcttgattattaggaagtaactagaatatgtagttagcggtgaaatgcttagagattacatggaataccaattgcgaaggcaggttac  
tactaatggattgacgctgatggacgaaagcgtgggtagcgaaca

>7484615e4461354c073c50c069fcd5c5

tggggaatcttagacaatgggggcaaccctgatctagccatgccgctgagtgatgaaggccttaggggttgtaaagctctttcagctgggaagat  
aatgacggtaccagcagaagaagccccggctaactccgtgccagcagccggttaatacggaggggctagcgttgttcggaattactgggcg  
taaagcgacgtaggcggactggaaagttaggagtgaaatccagggctcaaccttggaactgccttcaaaactatcagctctggagttcgagag  
aggtagtggaattccgagtgtagaggtgaaatcgtagatatcggaggaaacaccagtggcgaaggcggctcactggctcgatactgacgctg  
aggtgcgaaagcgtggggagcgaaca

>755d78b08ff387893f0deb62c8f0e6ec

tggggaatattgcacaatggggcgaaagcctgatgcagcgacccgctgagggatgacggccttcgggttgtaaactctttcagcaggggaag  
aagcgaaagtgcggtacctgcagaagaagcaccggctaactacgtgccagcagccggttaatacgtaggggtgcgagcgtgtccggaatta  
ttgggcgtaaagagctttaggcggtttgtcgctctgcagtgaaaatccggggctcaacccggacttgctgtgggtacgggcagactagagt  
tggtaggggagaccggaattcctgggttagcggtggaatgcgcagatatcaggaggaaacaccgatggcgaaggcaggtctctgggccacaact  
gacgctgagaagcgaaagcatggggagcgaacaggattagataccccagtag

>76000149a575735de0dcf5d2db530790

tggggaattttcgcaatggggcgaaagcctgacggagcaatgccgctggagggtggaaggcctacgggtcgtcaacttctttctcggaaga  
aacaatgacggtatctgaggaataagcatcggttaactctgtgccagcagccggttaagacagaggatgcaagcgttatccggaatgattgg  
gcgtaaagcgtctgtaggtggctttcaagtcgccgctcaagtcacagggtcaacccctggacaggcgggtgaaactaccaagctggagtacgg

taggggcagaggggaatttccggtggagcggtgaaatgcattgagatcggaaagaacaccaacggcgaaagcactctgctgggccgacactga  
cactgagagacgaaagctaggggagcaaatg

>76c6d8f0905c4d929ed1279bc69858f9

taaggaatattggtcaatggacgaaagtctgaaccagccatcccgcgtgcaggatgaaggtcctatggattgtaaactgcttttagcagagaag  
aaaagcatccttttaagggtgtctgacggtatctgcggaataagcaccggctaactccgtgccagcagccgcggtatacggaggggtgcaagcg  
ttatccggaatcactgggtttaaagggtgcgtagggcgaatattaagtcagtggtgaaagcctgtcgttaacgatagaactgccattgatactg  
atattcttgaaattgggttagggttagcggaaatgtgacatgtagcggtgaaatgcatagatatgtcatggaacaccaattgcgaaggcagctagct  
gggccttgattgacgtgaggcacgaaagcgtgggttagcgaaca

>76f0f8255428fb1f026f84aef1e0f8a0

taaggaatattggtcaatggacggaagtctgaaccagccatcccgcgtgcaggatgactgccctatgggtgtaaactgcttttagcagagacga  
aacgccttcatttatgagggtctgacggtatctgcagaataagcaccggctaactccgtgccagcagccgcggtatacggaggggtgcaagcgt  
tatccggaatcactgggtttaaagggtgcgtagggcggatatttaagtcagtggtgaaatcttgcgttaacgataaaattgccattgatactgaa  
tgtcttgaaattgggttagggttagcggaaatgtgacatgtagcggtgaaatgcatagatatgtcatggaacaccaattgcgaaggcagctagctgg  
gccttgattgacgtgaggcacgaaagcgtgggttagcgaaca

>773b3812f142ad767f3859237e8f8515

tagggaatcttccgaatgggcgaaagcctgacggagcaacccgcgtgagtgatgaaggtcttcggatcgtaaaactctgttattaggaaga  
acaaatgtgtaagtaactatgcacgtcttgacgggtacctaatacagaagccacggctaactacgtgccagcagccgcggtatacgttaggtggc  
aagcgttatccggaattattggcgtaaaagcgcgctgagggcgtttttaagtcgtatgtgaaagcccacggctcaaccgtggaggggtcattgga  
aactggaaaacttgagtgcagaagaggaaagtggaaattccatgtgtagcggtgaaatgcgcagagatatggaggaaacaccagtggcgaagtc  
gactttctggtctgtaactgacgtgatgtgcgaaagcgtggggatcaaaca

>78c0834c53fcc6c1960f7b3740fd9a61

taaggaatattgcgaatgggcgaaagcctgacgcagcgacccgcgtgggggatgaaggtcttcggattgtaaaccccttcgggaggggaag  
atggagcgagcaatcgttcggacggtacctcagaagcagccacggccaacttcgtgccagcagccgcggtatacgaaggtggcaagcgttg  
ttcggattcactgggctacagggtgtgtagggcgttttgtaagccttctgttaaagccttcgggccaacccggaagcgagaggggtactgcca  
ggctagaggggtgggagaggagcgcggaattcccggttagcggtgaaatgcgtagagatcgggaggaaggccgggtggcgaaggcggcgctct  
ggaacatgcctgacgtgagacacgaaagcgtggggagcaaacg

>7eed10c4fffc3fd0a4c865a359fec1df

tggggaatattgcacaatgggcgaaagcctgatgcagcaatgccgcgtgattgaagaaggccttaggggtgtaaagatctttaccaagaatga  
taatgacagtacttggggaataaggaccggctaacttcgtgccagcaccgcggtatacgaaggggtccaagcgttactcggatttactgggcgt  
aaagtgcgcgtaggctgattggcaagtgaaagttaaattccccgggctcaacttggaatcgctttcgaaactgccttttagagtttggttagag  
agaagtggaattcttagtgagggggtaaaatccgtagatattaagaggaaacaccggaggcggaaggcgacttcttggccaatactgacgtga  
ggcggaaggcgtggggagcaaacg

>8173390115e64057c54bd029bf900023

tggggaatttccgcaatgggcgaaagcctgacggagcaatgccgcgtggaggtagaaggcccacgggtcatgaacttctttccggagaaga  
agcaatgacggtatctggggaataagcatcggtactctgtgccagcagccgcggtatacagaggatgcaagcgttatctggaatgattggg  
cgtaaagcgtctgtaggtggcttttaagtcggtcaaatcccagggtcaactctggacaggcgggtggaaactaccaagctggagtacggta  
ggggcagaggggaatttccggtggagcggtgaaatgcgtagggatcggaaagaacaccaacggcgaaagcactctgtgggccgacactgaca  
ctgagagacgaaagctagggggcgcaatg

>81ef04fc448a46c418860d949afca5be

tggggaatattggacaatgggcgcaagcctgatccagccatgccgcgtgagtgaaggccctagggtgtaaagctctttcaccggtgaaga  
taatgacggtaaccggagaagaagccccggctaactctgtccagcagccgcggtatacgaagggggtagcgttgttcggaattactgggc  
gtaaagcgacgtaggcggtatttaagtcaggggtgaaatcccagagctcaactctggaactgccttgatactgggtacctagagtatggaa  
gaggtaaagtgaattccgagtgtagaggtgaaattcgtagatattcggaggaacaccagtggcgaaggcggcttactggtccattactgacgct  
gaggtgcgaaagcgtggggagcaaaca

>828a4757876f251a1afe03b52c07441e

tagggaatcttcgcaatggacgaaagtctgacggagcaacgccgcgtgtatgaagaaggttttcggatcgtaaagtactgtttagagaaga  
acaaggataagagtaactgcttgccttgacggtatctaaccagaaagccacggctaactacgtgccagcagccgcggtatacgttaggtggc  
aagcgttctcggatttattgggctaaagcgcgcgagggcgtcttttaagtcgtatgtgaaagccccggcttaaccggggagggtcattgga  
aactggaagactggagtgcagaagaggagagtggaaattccacgtgtagcggtgaaatgcgtagatattcggaggaacaccagtggcgaaggc  
ggctcactggctcgatactgacgtgaggtgcgaaagtgtggggagcaaaca

>832a3e16b70814d1faf9e67ac5c26fee

taaggaatattggtcaatggacggaagtctgaaccagccatcccgcgtgcaggatgactgccctatgggtgtaaactgcttttagcagagacga  
aacgccttcattatgagggctgacggtatctgcagaataagcaccggctaactccgtgccagcagccgcggtatacggagggtgcaagcgt  
tatccggaatcactgggtttaaagggtgcgtaggggatatttaagtcagtggtgaaatcttgcgttaacgataaaattgccattgatactgaa  
tgtcttgaattgggttagggttagcggaatgtgacatgtagcggtgaaatgcatacatgtatgcatggaacaccaattgcgaaggcagctagctgg  
gccttgattgacgtgaggcacgaaagcgtgggtagcgaacaggattagataccccgggtagtc

>83ec7f7576dc9d09fb87f1d5d92fdaf2

tggggaatcttcgcaatgggcgaaagcctgacggagcaatgccgcgtggaggtagaaggccacgggtcgtgaactctttccgggagaaga  
agcaatgacggtatctgaggaataagcatcggtactctgtgccagcagccgcggtatacagaggatgcaagcgttatctggaatgattgg  
gcgtaaaggcgtctgtaggtggcttttaagtcgccgtccaatcccagagctcaacctggacaggcgggtgaaactaccaagctggagtacgg  
taggggcagagggaatttcgggtggagcggtgaaatgcgtagagatcggaagaacaccaacggcgaaagcacctgctgggccgacactga  
cactgagagacgaaagctaggggagcgaatg

>8427b8367229d57c683a805c8242dfe1

taaggaatattggtcaatgggcgcaagcctgaaccagccatgccgcgtgaaggatgaaggccctatgggtgtaaactctttgtacgggaaa  
aaacctctggtcgtgtatcagagctgatggtaccgtaagaataagcatcggtactccgtgccagcagccgcggtatacggaggatgcaagc  
gttatccgattcattgggtttaaagggtgcgcaggcggaataataagtcagcgggtgaaagcctacagcttaactgtagaactgccattgatact  
gttattcttgagtgtttaggttgccggaatgtgcatgtagcggtgaaatgcttagatatgacacagaacaccgatcggaaggcagctaac  
caagcaacaactgacgtcatgcacgaaagcgtggggatcaaaca

>847179e322a6d4463b4f0aec23812ef3

tggggaatcttgacaatgggcgaaagcccgatccagcaatatcgctgagtgaagaagggaatgccactgttaaagctcttcgtcagtg  
gcgatcatgtaggactcgaggaagaagccccggctaactccgtgccagcagccgcggtatacaggggcaagtgttctcggaatgact  
gggcgtaaaggacacgtaggcggtgaatcggttgaaagtgaagtcgcaaaaagtggcggaatgctctcgaaccaattcattgagttag  
acaaaggagagtgaatttcgtgttaggggtgaaatccgtagatctacaaaggaacaccaaagcgaaggcagctctcgggtccctaccga  
tgctggggtgcgaaagcatggggagcgaaca

>849c8179a62919a1b5c4766d089df22c

tggggaatcttagacaatgggggcaaccctgatctagccatgccgcgtgagtgaaggccttagggtgtaaagctcttcagctgggaagat  
aatgacggtagcagagaagaagccccggctaactccgtgccagcagccgcggtatacggagggggtagcgttgttcggaattactgggcg  
taaagcgacgtaggcggaccggaagtgggggtgaaatccccgggtcaacccgggaactgccttcaaaactactggtctggagtgcaga  
gaggtgagtgaattccgagtgtagaggtgaaattcgtagatattcggaggaacaccagtggcgaaggcggctcactggctcgatactgacgct  
gaggtgcgaaagcgtggggagcaaaca

>84bb310929a2055b527f353254083568

caaggaattttccgcaatgggagcgaagcctgacggagcaacccgcgtgaggatgacgcttttcggagtgtaaaccgctgttcggggggacg  
aagcactgacggtacccccggaggaagggccgctaactacgtgccagcagccggttaatacgtaggggtcgagcgttgccggagtactg  
ggcgtaaagcgtgcgagggcgctcatcgcgctggcggtgaaagccccggctcaaccggggaggggtcgtagggacgggtgagcttgagggt  
atcaggggttggtggaattcccggtgtagtggtgaaatgcgtagagatcgggaggaacacccgtggcgaaggcgccaactgggatacacctg  
acgctgaggcacgaaggcgtggggagcgaacg

>84c412bb52078c7ce2172d30d6c90096

tggggaatattggacaatgggggaaaccctgatccagcaacccgcgtggaggatgaaggcttctggattgtaaactcctgttaggggggacg  
aagggtatgctggcgaacagtcggcaaaactgacggtacccccagaggaagccccggctaactctgtgccagcagccggttaatacagagg  
ggcaagcgttattcggaattattggcgtaaaggcgcgtaggcggccttgaagtcttggtgaaatccctcagctcaactgaggaactgcctc  
ggatactgcaaggcttagggccggagagggtagtggaattccagtgtagcggtgaaatgcgtagatattgggaggaacaccggtggcgaag  
gcggtacttgaccggttctgacgctgatgcgcgaaagcgtggggagcaaca

>84dd907bab2a29dd7f09f33838146da4

tagggaatcttcgcaatggagcgaagctgacggagcaacccgcgtgtatgaagaaggttttcggatcgtaaagtactgtttagagaaga  
acaaggataagagtaactgcttgccttgacggtatctaaccagaaagccacggctaactacgtgccagcagccggttaatacgtaggtggc  
aagcgttctccgatttattggcgtaaagcgagcgagggcgttcttaagtctgatgtgaaagccccggctcaaccggggagggcattgg  
aaactggggaacttgagtgcagaagaggagagtgggaattccatgtgtagcggtgaaatgcgtagatatatggaggaacaccagtggcgaagg  
cgactctctggtctgtaactgacgctgaggctcgaaagcgtgggtagcaaca

>853baa5b9e0e66697ddf03b73990e9ae

tggggaatcttcacaaatgggagcgaagcctgatgcagcaacccgcgtgagggaagaaggccctaggggtgtaaaccgctttcagcaggggaag  
aaactgacggtacctgtagaagaaggtgaggccaactacgtgccagcagccggtgacacgtaggcaccaagcgttgccggatttattggg  
gtaaagagctcgtaggcggttcggtaagtcgggtgtgaaaactctgggtcaaccagagccgacactgatactgctgtgactcgagtcggt  
aggggagcggggaattcctggtgtagcggtgaaatgcgcagatatcaggaggaacaccagtggcgaaggcgcgctctgggccgtgactgac  
gctgaggagcgaaagcgtgggtagcaaca

>85a950584e63a02aa3389cab382a3d2a

tggggaatattgcacaatgggagcgaagcctgatgcagcagccgcgtgaggatgacggccttcgggtgtaaactcctttcagcaggggaag  
aagcgaagtgacggtacctgcagaagaagcaccggctaactacgtgccagcagccggttaatacgtaggggtcgagcgttgccggaatta  
ttggcgtaaagagctttaggcggttgctgcgtctgctgtgaaaatccgggactcaattccggacttgagtggttacgggcagactagagta  
cggtaggggagactggaattcctggtgtagcggtgaaatgcgcagatatcaggaggaacaccgatggcgaaggcaggtctctgggccgtaact  
gacgctgagaagcgaagcatggggagcgaaca

>85d654dd53d5fe83a6b2ff8bc4c19c4f

taaggaatattccgcaatgggagcgaagcctgacggagcgacaccgcgtggaggatgacggcttaggggtgtaaactcctttctgagggaaga  
agatctgacggtacctcaggaataagcaccggctaattacgtgccagcagccggttaatacgttaagggtcaagcattatccggaattattggg  
cgtaaagcgtccgagggcggttgacaagtcagttattaaataccggagctcaacttcggtgctgtaaccgaaactgttaaactagaagatagg  
agaggtgtgtagaatgtacaagtaggggttaaataccgtagatatgtagtggaataccaaaagcgaaggcagcacactggactattcttgacg  
ctcagggacgaaagcgtaggtagcaaac

>8619181b69516743cde8331315c654f0

tgagggaattttccgcaatgggagcgaagcctgacggagcaataaccgcgtgaaggatgaaggcctatgggtgtaaactcctttctcagagaaga  
attttgacggtatctgaggaataagcatcggttaactctgtgccagcagccggttaagacagaggatgcaagcgttatccggattaattgggc  
gtaaagcgtctgtaggtggttatcaagtctttgtcaaagatcagggcctaaccctgggcaggcagaggaactagtagactagagttcggtg

gggcagaggggaattcccggtagagcggtgaaatgcgtagagatcgggaggaacaccaaaggcgaaggcactctgtgggcccgaactgacac  
tgagagacgaaagcgaggggagcaaatg

>8721e39bcd9e1b4021357893c56e6649

tggggaatattgcacaatgggcgaaagcctgatgcagcgacccgctgagggatgaaggccttcgggttgtaaactctttcagcaggggaag  
aagcgaaagtgcgggtacctgcagaagaagcaccggctaactacgtgccagcagccggttaatacgtagggtgcgagcgttgcggaatta  
ttgggcgtaaagagctttaggcggtttgtcgcgtctgtgtgaaaatccggggctcaacccggacttgacgtgggtacgggcagactagagt  
tggtaggggagactggaattcctggttagcgggtgaaatgcgcagatatcaggaggaacaccaatggcgaaggcaggtctctgggccaccact  
gacgtgagaagcgaaagcgtggggagcgaaca

>8727a65b7a8366be1a004d8eae91ed96

tagggaatcttcgcaatggacgaaagtctgacggagcaacgccgctgtatgaagaaggttttcggatcgtaaagtactgtttagagaaga  
acaaggataagagtaactgcttgccttgacggatatcaccagaaagccacggctaactacgtgccagcagccggttaatacgtagggtggc  
aagcgttgcggatttattgggcgtaaagcgcgcgaggcggtcttttaagtctgatgtgaaagccccggcttaaccgg

>88c12bf29fdd7b2d0f127d2b0d6a958f

tagggaatcttcgcaatggacgaaagtctgacggagcaacgccgctgtatgaagaaggttttcggatcgtaaagtactgtttagagaaga  
acaaggataagagtaactgcttgccttgacggatatcaccagaaagccacggctaactacgtgccagcagccggttaatacgtagggtggc  
aagcgttgcggatttattgggcgtaaagcgcgcgaggcggtcttttaagtctgatgtgaaagccccggcttaaccggggaggggtcattgga  
aactggaagactggagtgcagaagaggagagtggaaattccacgtgtagcgggtgaaatgcgtagatatgtggaggaacaccagtggcgaaggc  
gactctctggtctgaactgacgtgaggcgcaaagcgtggggagcaaacaggattagataccctgtag

>88e6446c09d3fe93253498a4d2f9a0c5

tgaggaatcttcgcaatgggcgaaagcctgacagagcaataccgctgagggatgaagacttactgagttgtaaactcgggtacctaaggaa  
gaagatctgacgggtacttaaggtggaaagcatcggtactccgtgccagcagccggttaagacgggggatgcaagtgttatccggattact  
gggcgtaaagcgtctgcaggtggttttctaagtctactgttaaatcttgaggctcaacctcaaactctgcagtagaaactaggagacttgagtatg  
taggggtagagggaattccagtgagcggtgaaatgcgtagatatggaaagaacaccgatggcgaaggcacttactgggctattactgac  
actcagagacgaaagctaggggagcaaatg

>890412537f45fcad06a7d20e4ebfd98a

tggggaatcttcgcaatgggcgaaagcctgatccagccatgccgctgcaggatgaaggccttcgggttgtaaactgctttgtacggaacgaa  
aaggtcttttctaataaagaaggctcatgacgggtacgtaagaataagcaccggctaactacgtgccagcagccggttaatacgtagggtgca  
agcgttaatcggaattactgggcgtaaagcgtgcgcaggcggttatataagacagatgtgaaatccccgggtcaacctgggaactgcattagt  
gactgtatagctagagtgcggcagagggggatggaattccgctgtagcagtgaaatgcgtagatatgcggaggaacaccgatggcgaaggc  
aatccccctgggctgcactgacgctcatgcagaaagcgtggggagcaaca

>89c3e82448157f26115944d903509787

tagggaatcttcgcaatggacgaaagtctgacggagcaacgccgctgtatgaagaaggttttcggatcgtaaagtactgtttagagaaga  
acaaggataagagtaactgcttgccttgacggatatcaccagaaagccacggctaactacgtgccagcagccggttaatacgtagggtggc  
aagcgttgcggatttattgggcgtaaagcgcgcgaggcggtcttttaagtctgatgtgaaagccccgggttaaccggggaggggtcattgga  
aactggaagactggagtgcagaagaggagagtggaaattccacgtgtagcgggtgaaatgcgtagatatgcggaggaacaccgatggcgaaggc  
aatccccctgggctgcactgacgctcatgcagaaagcgtggggagcaaca

>8a6829c8525f949e5a98f6ac78ca6b14

tggggaatcttcgcaatgggcgaaagcctgacggagcaatgccgctggaggtagaaggccacgggtcatgaactcttttccggagaaga  
agcaatgacgggtatctggggaataagcatcggtactctgtgccagcagccggttaatacagaggatgcaagcgttatccggaatgattggg  
cgtaaagcgtctgtaggtggcttttaagtccgcgtcaaataccagggtcaactctggacaggcggtggaaactaccaagctggagtacagta

ggggcagaggggaatttcggtggagcgggtgaaatgcgtagagatcggaagaacaccaacggcgaaagcactctgctgggccgacactgaca  
ctgagagacgaaagctaggggagcgaatg

>8c9da229c2301074e8bc5cd4c6951914

tgagggaattttccgcaatggggcgaaagcctgacggagcaataccgcgtggaggatgacggcctgtgggtcttaaactccttttcttagagaaga  
agttctgacgggtatctaaggaataagcatcggctaactccgtgccagcagccgcggtaatacgggggatgcaagcgttatccggaatgattggg  
cgtaaagcgtctgtaggtggctttccaagtcaactgtcaaaaatcagggcttaaccttgagccggcagttgaaactatgaagcttgagttaggt  
ggggcagaggggaattcctagtgtagcgggtgaaatgcgtagatattaggaagaacaccaatcgcgaaagcactctgctgggccatgactgacac  
tgaga

>8d32dd3b7283c5f6059cf82f62d4d4c3

tggggaatattggacaatggggcgaaagcctgatccagcaataccgcgtgagtgtgacggccttcgggttgtaaagctcttttagtagggaaga  
taatgacgggtacctacagaaaaagcaccggctaactctgtgccagcagccgcggtaatacgaagggtgctagcgttgttcggaatcattggggc  
taaagggtgcgtagggcgtttgacaagtcagttgtgaaagccagggctcaaccttggaactgcaattgaaactgttagactagaatttggtgg  
gggataatagaattcctagtgtaggggtgaaatccgtagatattaggaggaataccagaggcgaaggcgattgtctataccaatattgacgctg  
aggcacgaaagcgtggggagcaaca

>8e98d6ad2a7a87f80737c4ddb1a37c09

tagggaatattgggcaatggggcgaaagcctgacccagccatgccgcgtgcaggatgaaggcgctcagcgttgtaaactgcttttctgggaag  
aaaagtatgcctgcgggtgtatgtgacgggtaccagaggaataagcaccggctaactccgtgccagcagccgcggtaatacggaggggtgcaagc  
gttgcctggatttattgggttaaagggtgcgtaggtggttagcccaagtctggttgaaagctggtcgctcaacgatcagatgtggctggaactg  
ggttacttgaatggattggcggttagccggaatgggtcatgtagcggtgaaatgcatagatatgaccggaaccccgattgcaaggcaggctac  
tacgatttgattgacactgaggcacgagagcatgggtagcgaaca

>8f923ea037326c333eda51ef9b127412

taagggaattttcgcaatgggggaaacccctgacgaagcaacaccgcgtgagggatgaaggccttttggttgtaaactcctttttgaggggaataa  
atatgaaggtacctgaagaataagcatcggctaactacgtgccagcagccgcggtaagacgttaggatgcaagcgttatccggaattattgggcg  
taaagagtctgtaggcgaattgttaagtaggatgttaaagaccagtgctaactgggaagggtatcctaaactggcaaaatagagtatgacag  
aggcaagtagaattctgtgttaggggtaatatccgtagatatacagaggaatacaaaaagcgaaggcagcttgctgggtcattactgacgctc  
aaggacgaaagcgtggggagcaaca

>8fb136cf860905ec86a2f52528331b5c

tggggaatcttgacaatggggcgaaagcctgatccagccatgccgcgtgagtgtgaaggccctagggtcgtaaagctcttcgccaggggatga  
taatgacagtacctggtaaagaaaccccgctaactccgtgccagcagccgcggtaatacggaggggggttagcgttgttcggaattactgggcg  
taaagcgcgcgttaggcggttagtcagtcagaggtgaaatcccagggctcaaccttggaactgcctttgatactgctagtcttgagttcagagga  
ggtgagtggaattccgagtgtagaggtgaaatcgttagatattcggaaggaacaccagtggaaggcggctcactggctcgatactgacgctga  
ggtgcgaaagtgtggggagcaaca

>8fc3742c23b5314516453a96b9f789d3

caagggaattttccacaatggacgaaagtctgatggagctacgccgcgtgcgggatgacgcctttcgggggtgtaaaccgctttcatagggacga  
atacaatgacgggtacctatggaataaggtacggctaactacgtgccagcagccgcggtaagacgttaggatccgagcgttgcggagttactgg  
gcgtaaagcgagcgcaggcgggtttgtacatcggcgggtgaaagcccccgctcaacgggggagggtccgtcgagatggcaagactggaggctg  
ggagaggtcggtggaattccgggtgtagtggtgaaatgcgtagatattcggaaggaacaccagtggaaggcggccgactggaccagacctg  
acgctaaggctcgaaggcgtggggagcgaacg

>9002efc8d0aae0e00570a0ef34a8f2f4

tggggaattttccgcaatgggcgaaagcctgacggagcaatgccgctggaggtagaaggccacgggtcgtgaacttctttccggagaaga  
agcaatgacggtatctggggaataagcatcggtactctgtgccagcagccgcgtaatacagaggatgcaagcgttatccggaatgattggg  
cgtaaagcgtctgtaggtggcttttaagtccgctcaaatcccagggtcaaccctggacaggcgggtggaaactaccaagctggagtacggt  
aggggcagaggggaatttccggtggagcgggtgaaatgcgtagagatcggaagaacaccaacggcgaaagcactctgtgggccgacactgac  
actgagagacgaaagctaggggagcgaatg

>905101afe6a987f895da576d843421f4

tggggaatattggacaatgggcgcaagcctgatccagccatgccgctgagtgtgaaggccttagggtgttaaagctcttcagtggggaaga  
taatgacggtaccacagaagaagccccggctaactctgtgccagcagccgcgtaatacgaaggggtagcgttcttcggttactgggcg  
taaagcgacgtaggcggtttgttaagtcaggggtgaaatcccggagctcaactccggaactgcctttgatactggcaagctagagtccggaag  
aggttaagtggaaactcctagtgtagaggtggaattcgtagatattaggaagaacaccagtggcgaaggcggcttactggccggaactgacgctg  
aggtgcgaaagcgtggggagcaaaca

>908f448f4f59b402848848bdea0afb0e

tcgcggtgatacggagaggacgagtgttactgtattgactgggtgtaaagcgtatgtagacgtctaaaaagtttagatttaaaatttagttat  
aactaaaaatttcttttatttttagattgagttataaggaagattacagaatttaagtgttaggggtaaaatccgtttgaaatttaaagacta  
tcaattggcgaaggcagtaattctattataactgacgttgagatacagaagcataggtatcgaaca

>91012b39de4d8b24803ecbb66e792649

tagggaatcttccgcaatggacgaaagtctgacggagcaacgccgctgtatgaagaaggtttccggatcgtaaagtactgttgttagagaaga  
acaaggataagagtaactgcttgccttgacggtatctaaccagaaagccacggctaactacgtgccagcagccgcgtaatacgtaggtggc  
aagcgttgcggatttattgggcgtaaagcgcgcgaggcggctctttaagtctgatgtgaaagccccggcttaaccggggagggtcattgga  
aactggaagactggagtgcagaagaggagagtggaaattccacgtgtagcgggtgaaatgcgtagagatctgaaggaataccggtggcgaaggc  
ggccccctggacagatactgacactcagatgcgaaagcgtggggagcaaaca

>923513ea0a7374d4a1c8d0e14c18f370

tccggaatcttgacaattggcgaaagccagatccagccatattacgtgaaggatgaagactttttggtgttaaacttcttactttttaagtta  
aagagtataaaaagccccggctaactctgtgccagcagccgcgtaatacagatggggcaagtgttattcggaatgattgggcgtaaagggtg  
cgtaggtggttttattagtcagttgtcacaaccttttagaaaagaatcgacgttttaaagactacaaaacttgagttgatagaggaaagcgg  
aattttgagtgagagatagaattcatagatattcaaaggaacaccgaaaacgaaggtagctttctgggtcaactgacgctcatgtacgaa  
gcatggggagtaaattgggattagataccctagta

>926a0f4e5e66b87f67782220da523ccb

tagggaatcttccgcaatggacgaaagtctgacggagcaacgccgctgtatgaagaaggtttccggatcgtaaagtactgttgttagagaaga  
acaaggataagagtaactgcttgccttgacggtatctaaccagaaagccacggctaactacgtgccagcagccgcgtaatacgtaggtggc  
aagcgttgcggatttattgggcgtaaagcgcgcgaggcggctctttaagtctgatgtgaaagccccggcttaaccggggagggtcattgga  
aactggaagactggagtgcagaagaggagagtggaaattccacgtgtagcgggtgaaatgcgtagatatagggaaggaacaccagtggcgaagg  
cgactacctggactgatactgacactgaggtgcgaaagcgtggggagcaaaca

>927e2df075c0c36f471872f7090fd2e3

tgaggaaatattggacaatgggcgcaagcctgatccagccatgccgctgcaggatgaagcatctatggtgtgttaaactgctttgtacgagaag  
aaactgcttctgtgaagcagcttgacggtatcgtaagaataaggatcggtactccgtgccagcagccgcgtaatacggaggatccaagc  
gttatccggaatcattgggtttaaagggtccgtaggtggataattaagtcagaggtgaaatcctgcagctcaactgtagaattgcctttgatactg  
gttatcttgagtcattatgaagtgggttagaatatgtagtgtagcgggtgaaatgcatagatattacatagaataccaattgcgaaggcagatcacta  
ataatgtactgacactgatggacgaaagcgtggggagcgaaca

>934208deb7b3c30ce40a90260bd65058



ccaccttacctacgggggctgcagtgaggaatccccgcaatgggcgaaagcctgacggagcaataccgctggaggatgacggcctgtgggt  
cttaaactcctttcttagagaagaagttctgacggtatctaaggaataagcatcggctaactccgtgccagcagccgcgtaatacgggggatg  
caagcgttatccggaatgattgggcgtaaagcgtctgtaggtggctttcaagtcaactgtcaaaaatcagggcctaacttgagccggcagttg  
aaactatgaagcttaggttaggttaggggcagaggggaattcctagtgtagcgg

>93b58b0ba0d326e9c8d1a81f8672c16a

tggggaatattgcacaatgggggaaaccctgatgcagcgacgccgctgagcgatgaagtatttcggtatgtaaagctctatcagcaggggaag  
aaaatgacgggtacgtgactaagaagcaccggctaaatacgtgccagcagccgcgtaatacgtatggtgcaagcgttatccggttactgggt  
gtaaaggagcgtagacggagtggaagtctgatgtgaaaaccggggctcaacccgggactgcattggaaactgtcaatctagagtaccgg  
agaggtgaagcgggaattcctagtgtagcgggtgaaatgcgtagatattaggaggaacaccagtggcgaaggcggcttactggacggtaactgacg  
ttgaggctcgaaagcgtggggagcaaca

>93f07800045d5772842b7590ae86af64

tagggaatcttcgcaatggacgaaagtctgacggagcaacgccgctgtatgaagaaggttttcggtatcgtaaagtactgttggtagagaaga  
acaaggataagagtaactgcttgccttgacgggtatctaaccagaaagccacggctaactacgtgccagcagccgcgtaatacgtaggtggc  
aagcgttgcggatttattgggctaaagcgcgcgagggcggtcttttaagtctgatgtgaaagccccggcttaaccggggagggtcattgga  
aactggaagactggagtgagaagaggagtggaattccacgtgtagcagtgaaatgcgtagatgtggaggaacaccgatggcgaagg  
cagccccctgggctgtactgacgctcatgcagaaagcgtggggagcaaca

>947491f1482ef2840f9fc28c5277d655

tggggaatccccgcaatgggcgaaagcctgacggagcaataccgctgagggatgaaggcttactgagttgtaaactcctttttcaaggaaga  
agttctgacgttactgaagaataagcatcggctaactccgtgccagcagccgcgtaagacggaggatgcaagtgttatccggaatcactggg  
cgtaaagcgtctgcaggtggtttttaagtctgatgttaaaacttgaggctcaacctcaatccagcattggaaactgaaagactagagtatagtag  
ggatagagggaattccagtgagcggtgaaatgcgtagatattggaaagaacaccgatggcgaagcactctattggactattactgacactc  
agagacgaaagctaggggagcaaatg

>94b06f09456f242293cf812d43f6c8da

tagggaatcttcgcaatggacgaaagtctgacggagcaacgccgctgtatgaagaaggttttcggtatcgtaaagtactgttggtagagaaga  
acaaggataagagtaactgcttgccttgacgggtatctaaccagaaagccacggctaactacgtgccagcagccgcgtaatacggaggggg  
ttagcgttgttcggaattactgggctaaagcgcacgtagcggttggaagttagaggtgaaatccggggctcaacccgggaactgccttta  
aaactcccagcttagagttcagagagaggtgaattccgagtgtagaggtgaaatcgtagatattcggaggaacaccagtggcgaaggc  
ggcttactggctcgatactgacgctgaggtgcgaaagtgtggggagcaaca

>94b59a29370ce50fd7dc6b92027eac2c

tagggaatcttcgcaatggacgaaagtctgacggagcaacgccgctgtatgaagaaggttttcggtatcgtaaagtactgttggtagagaaga  
acaaggataagagtaactgcttgccttgacgggtatctaaccagaaagccacggctaactacgtgccagcagccgcgtaatacgtaggtggc  
aagcgttgcggatttattgggctaaagcgcgcgagggcggtcttttaagtctgatgtgaaagccccggcttaaccggggagggtcattgga  
aactggaagactggagtgagaagaggagtggaattccacgtgtagcggtgaaatgcgtagatgtggaggaacaccagtggtg

>94d62eef2e4702fb308c32bc470c4a93

tagggaattctggacaatgggcgaaagcttgatccggtgatcagagaagtgaagaaggttaactccgtaaaacttgattactaaagaggatg  
atgacgttatttagtaaggaagccccggctaattctgtgccagcagccgcgtaatacaggaggggctagtgttactcatcatgattgggcgtaa  
agagtatgtaggcggtttgtgaagttgatgaaagtaaaaccagcaaaactagaatataggagaggatagccgtattcctagtggagaggtgaa  
atgtgaagatattaggaggacgaacaaaggcgaaggcagctatctggcttataattgacgctgagatacgaagcagggtagcgaata

>94f6f537930dcabb1c681113760ca0d4

tcgagaatctttcacaaatgggggcaaccctgatggagcgacgccggtggaggataaggtcttcgattgtaaactcctgtcatgcgagaacaa  
ggtagttgggttaataacctagctgcttgatggtaccgcaagaggaagagacggctaactctgtgccagcagccggttaatacagaggtctca  
agcgttgttgcgaatcactgggcgtaaaagggtgcgtaggtgcgccgtaagtcagatgtgaaagctcagggctcaaccctgaaattgcatccga  
tactgcggtgctagagaaatgaaggggagtctagaatcttcggtgtagcagtgaaatcgctagatatcgaaaggaataccaaaggcgaaggca  
ggactctgggcattttctgacgctcatgcacgaaggctagggtagcgaacg

>952a9acbce2aaead15a571890f76c9c0

tggggaatcttgacaatgggcgaaaagcccgatccagcaatatcgctgagtgagaagggaatgccgcttgtaaagctcttcgtcgagtgc  
gcgatcatgacaggactcgaggaagaagccccggctaactccgtgccagcagccggttaagacggggggggaagtgttcttcggaatgact  
gggcgtaaaaggcacgtaggcggtgaatcggttgaaagtgaagtcgcaaaaagtggcggaatgctctgaaaccaattcacttgagtga  
acagaggagggtggaatttcgtgtgtaggggtgaaatccgtagatctacgaaggaaacgcaaaagcgaaggcagctctctgggtccctaccga  
cgctggggtgcgaaagcatggggagcgaaca

>9558a489a409072daa2651abd7ef72bc

tggggaatattgcgaatgggcgaaaagcctgacgcagccacgccgctgagcgatgaaggccttcgggtcgtaaagctctgtggggagagacg  
aagaaagcccgtgaagagcgggccttgacggtatctccttagcaagcaccggctaactccgtgccagcagccggttaatacggagggtgcaa  
acgttgctcggaatcattgggcgtaaaagcgacgtaggcgcggaagcaagtgggtgtgaaagccctgggctcaaccaggaagtgcattcaa  
aactgcttcgcttgaaatctcgaggggggtcagagaattccgggtgtagaggtgaaatcgtagatatcgggaggaataccagtggcgaaggcgc  
tgacctggacgaagattgacgctgaggtgcgaaagcgggggagcaaca

>957ab590811dc97ca515a107e4cb1e88

tagggaatcttcgcaatgggcgaaaagcctgacggagcaacgccgctgagtgatgaaggcttcggatcgtaaaactctgttatcaggggaaga  
acaaactgttaagtaactgtgcacgtcttgacggtacgtatcagaaagccacggctaactacgtgccagcagccggttaatacgtaggtggc  
aagcgttatccggaattattgggcgtaaaagcgcgctaggcggtttttaagtctgatgtgaaagcccacggctcaaccgtggagggtcattgga  
aactggaaaacttgagtgcagaagaggaaagtggaattccatgtgtagcggtgaaatgcgcagagatatggaggaacaccagtggcgaaggc  
gactttctggtctgtaactgacgctgatgtgcgaaagcgtggggatcaaca

>9598d2588ce7fdb88b62b7ee13936b19

tagggaatcttcacaaatggacgaaaagtctgatggagcaacgccgctgagtgagaagggttttcggatcgtaaaactctgttggtagaaga  
atgtatctgatagtaactgatcaggtatgacggtatccaaccagaaagccacggctaactacgtgccagcagccggttaatacgtaggtggc  
aagcgttgcggatttattgggcgtaaaagcgagcgagcggtttcttaagtctgatgtgaaagccttcggctcaaccgaagaagtgcacgga  
aactgggaaaacttgagtgcagaagaggacagtggaaactccatgtgtagcggtgaaatgcgtagatatatggaagaacaccagtggcgaaggc  
ggctgtctggtctgtaactgacgctgaggctcgaaagcatgggtagcaaca

>97d7b22c16e90083752975349ca1df39

tggggaatcttcgcaatgggcgaaaagcctgacggagcaatgccgctggagggtggaaggcctacgggtcgtaactcttttctcggaaga  
aacaatgacggtatctgaggaataagcatcggttaactctgtgccagcagccggttaagacagaggatgcaagcgttatccggaatgattgg  
gcgtaaaagcgtctgtaggtggctttcaagtccgccgtaaatccagggtcaaccctggacagggcgggtgaaactaccaagctggagtacgg  
taggggcagaggggaatttcgggtggagcggtgaaatgcattgagatcggaagaacaccaacggcgaaagcactctgctgggccgacactga  
cactgagagacgaaagctaggggagcaaatgggattagatacccttag

>98eb46039335ec8a290cf3f5ea0fb4e5

taaggaatattggtcaatgcccggaagggtgaaccagccatgccgctgaaggatgactgccctctgggttgtaaactcttttgatgggacga  
aaaaacgggatttatcctggactgacggtaccatcagaataagcaccggctaactccgtgccagcagccggttaatacggagggtgcaagcg  
ttatccggaatcactgggttaaaagggtgcgtagcggtttataagttagaggtgaaagcatgcagcttaactgtataattgcctttgatactga  
agacttgaataaggttaggttgccggaatgtgacatgtagcggtgaaatgcttagatatgtcatagaacaccgattgcgaaggcagctgactg  
ggcctttattgacgctgaggcacgaaagcgtggggagcgaaca

>993a18382137e354f9d889e09a47238c

tggggaatcttgacaatgggcgaaagcccgatccagcaatatcgctgagtgagaagggaatgccgcttgtaaagctcttcgctcagtgcgatcatgacaggactcgaggaagaagccccggctaactccgtgccagcagccggtgaagacgggggggcaagtgttcttcggaatgactggcgtaaaagggcacgtaggcggtgaatcggttgaaagtgaagtcgcaaaaaagtggcggaatgctctcgaaaccaattcacttgagtgagacagaggagagtggaaatttcgtgtgtaggggtgaaatccgtagatctacgaaggaaacgcaaaagcgaaggcagctctctgggtccctaccgacgtgggtgcgaaagcatggggagcgaacaggattagatacccctgtag

>9960b20e17a6ebd5bf31b249c3503956

tggggaatattgcacaatgggcgaaagcctgatgcagcaacgccgctgagcgatgaaggccttcgggtcgtaaagctctgtcctcaagggaagataatgacgggtacttgaggaggaagccccggctaactacgtgccagcagccggtgaatcgtagggggctagcggtatccggatttactggcgtaaagggtcgtaggtggtttctaagtcaggagtgaaggctacggctcaaccgtagtaagctcttgaaactgggaaacttgagtcaggagaggaaagtggaaattcctagtgtagcggtgaaatcgtagatattaggaggaacaccagtagcgaaggcggtttctggactgtaactgacactgaggcacgaaagcgtggggagcaaca

>9962d3a861210082d9b216dc6bdc8b7c

tagggaatcttcgcaatgggacgaaagctgacggagcaacgccgctgtatgaagaaggttttcggatcgtaaagtactgttggtagagaagaacaaggataagagtaactgcttgccttgacgggtatctaaccagaaagccacggctaactacgtgccagcagccggtgaatcggagggtgaagcgttatccggaatcactgggtttaaagggtgcgtagggcggttagtaagtcagagggtgaaagccggcgctcaacgtcggaattgccttgaactggctaactgaatcaggttaggtggcggaatgtggcatgtagcggtgaaatgcatagatatgccatagaacaccaattgcgaaggcagctcactggccctgcattgacgtgaggcacgaaagcgtggggagcgaaca

>9a2d021f88b77d7e51b50d3718b02276

tggggaattttcgcaatgggcgaaagcctgacggagcaatgccgctggaggtagaaggccccagggctcatgaacttctttccgggagaagaagcaatgacgggtatctggggaataagcatcggtactctgtgccagcagccggtgaatacagaggatgcaagcgttatccggaatgattggcgtaaagcgtctgtaggtggcttttaagtcgccgtcaaatccagggtcaactctggacaggggtggaaactaccaagtggagtacggtaggggcagagggaatttcgggtggagcggtgaaatgcgtagagatcggaaaggacaccaacggcgaaagcactctgctgggcccacaccgacatgagagacgaaagctaggggagcgaatg

>9a71eb30b24bad698cc5082bb184be62

tggggaatcttgacaatgggcgaaagcccgatccagcaatatcgctgagtgagaagggaatgccgcttgtaaagctcttcgctcagtgcgatcatgacaggactcgaggaagaagccccggctaactccgtgccagcagccggtgaagacgggggggcaagtgttcttcggaatgactggcgtaaaagggcacgtaggcggtgaatcggttgaaagtgaagtcgcaaaaaagtggcggaatgctctcgaaaccaattcacttgagtgagacagaggagagtggaaatttcgtgtgtaggggtgaaatccgtagatctacgaaggaaacgcaaaagcgaaggcagctctctgggtccctaccgacgtgggtgcgaaagcatggggagcgaacaggattagatacccctgtag

>9a7c75b7b0897efe49682881232a5f65

tgaggaaatcttcgcaatgggcgaaagcctgacggagcaataccgctggaggtgacggcctgtgggtcttaactcctttcttagagaagaagtctgacgggtatctaaggaataagcatcggtactccgtgccagcagccggtgaatacgggggatgcaagcgttatccggaatgattggcgtaaagcgtctgtaggtggctttcaagtcaactgtcaaaaatcagggttaaccttgagccggcagttgaaactatgaagcttgagttagtaggggcagagggaattcctagtgtagcggtgaaatgcgtagatattaggaagaacaccaatcgcaagcactctgctgggcatgactgacac t

>9ae4a24f8afe2d11c1c619180d04e01d

tggggaatcttagacaatgggggaaaccctgatctagccatgccgctgagcgatgaaggccttaggggtgtaaagctcttcagctgggaagataatgacgggtaccagcagaagaagccccggctaactccgtgccagcagccggtgaatacggagggggctagcgttgttcggaattactggcgtaaagcgacgtaggcggttggaagtgcagaggtgaaatccagggtcaaccctggaaactgcctttgaaactcccagtccttaggtcgaga

gaggtgagtggaattccgagtgtagaggtgaaattcgtagatattcggaggaacaccagtggcgaaggcggctcactggctcgatactgacgct  
gaggtgcgaaagcgtggggagcaaaca

>9b23053de8f4269fe6b5ce286dfbef3c

tagggaatcttcacaatggacgcaagtctgatggagcaacgccgctgagtgaagaagggtttcggctcgtaaagctctgttgtagtgaaga  
aagatagaggtagtaactggcctttatttgacggtaattacttagaaagtcacggctaactacgtgccagcagccggttaatacgtaggtggca  
agcgttgccggatttattggcgtaaagcgagtgacggcggttcaataagctctgatgtgaaagccttcggctcaaccggagaattgcatcagaa  
actgttgaaacttgagtgacagaagaggagagtggaactccatgtgtagcggtggaatgcgtagatatatggaagaacaccagtggcgaaggcgg  
ctctctggtctgcaactgacgtgaggctcgaaagcatgggtagcgaaca

>9d3e6fb754f8ac99ef9e38a3a06ab096

tgaggaatcttcgcaatgggcgaaagcctgacggagcaataaccgctggaggatgacggcctgtgggtcttaaactcctttcttagagaaga  
agtctgacggatctaaaggaataagcatcggctaactccgtgccagcagccggttaatacgggggatgcaagcgttatccggaatgattggg  
cgtaaagcgtctgtaggtggccttccaagtcaactgtcaaaaatcagggttaaccttgagccggcagttgaaactatgaagcttgagttaggta  
ggggcagaggggaattcctagtgtagcggtgaaatgcgtagagatctgaaggaataccagtggcgaaggcggcccttgacagatactgaca  
ctcagatgcgaaagcgtggggagcaaaca

>9e399cfde32835d6f62f43c10a994e4f

tggggaatattgcacaatgggcgaaagcctgatgcagcaacgccgctgagggatgacggccttcgggttgtaaactcctttcagtagggaaga  
agcgaaagtacgggtacctacagaagaagcaccggctaactacgtgccagcagccggttaatacgtagggtgcgagcgttgccggaattat  
tgggcgtaaagagctttaggcggtttgtcgcgtctgtgtgaaatccggggtcaaccccgacttgagtggttacgggcagactagagtg  
gtaggggagactggaattcctggtgtagcggtgaaatgcgcagatatcaggaggaacaccgatggcgaaggcaggtctctgggccactactg  
acgctgagaagcgaaagcgtggggagcgaaca

>9e4038cdef3bfb536a41fad896736e8f

tgaggaatattgggcaatggaggcaactctgaccagccatgccgctgcaggaagacggccctatgggttgtaaactgctttatacaggaag  
aaactgctacgtgtagcagcttgacgtactgtaagaataagcaccggctaactccgtgccagcagccggttaatacggagggtgcaagc  
gttatccggaatgattgggcgtaaagcgtctgtaggtggccttttaagtctccgtcaaatcccagggtcaacccctggacagggcgtgaaaacta  
ccaagctagagtacggtaggggcagaggggaattccggtggagcgtgaaatgcgtagagatcggaaggaacaccaacggcgaaagcactct  
gctgggccgacactgacactgagagacgaaagctaggggagcaaag

>9e56fae721b91205d3a17eec65e96d0b

taaggaatattggtcaatggaggaaactctgaaccagccatcccgcgtgaaggatgaaggggctctgccttgtaaactcctttgaatgggacga  
aaaaaggggatttatcctcgactgacgtaccattagaataagcaccggctaactccgtgccagcagccggttaatacggagggtgcaagc  
ttatccggaatcactgggtttaaagggtgcgtagggcggttaataagtcagtggtgaaaggccgtggcttaacatgggattgccattgatactg  
tatagcttgaaatgaggatgaggttggcggaatgtggcatgtagcggtgaaatgcttagatatgccatggaacatcgattgcgaaggcagctgac  
tggacctgaattgacgtgaggcacgaaagcgtgggtagcgaaca

>9e7125a102db8951720ec539b4e78113

tagggaatcttcggaatgggggcaaccctgaccgagcaacgccgctgagtgaagaagggtttcggatcgtaaagctctgttgtaagagaaga  
acgtgtgtgagagtggaaagttcacacagtgcggtaactaccagaaagggacggctaactacgtgccagcagccggttaatacgtaggtc  
ccgagcgttgccggatttattggcgtaaagcgagcgacggcggttaataagtcgaagttaaaggcagtggttaaccattgttcgctttgga  
aactgttagacttgagtgacagaaggggagagtggaattccatgtgtagcggtgaaatgcgtagatatatggaggaacaccgggtggcgaaagcg  
gctctctggtctgtaactgacgtgaggctcgaaagcgtggggagcaaaca

>9e8dc6c089b4d88a00f76870e272757d

tggcgaatcccccgcaatgggcgaaagcctgacggagcaatgccgctggaggtggaaggcctacgggtcgtaacttctttctcgagaaga  
aacaatgacggtatctgaggaataagcatcggctaactctgtgccagcagccgcgtaagacagaggatgcaagcgttatccggaatgattgg  
gcgtaaagcgtctgtaggtggcttttaagtcgccgtaaatcccagggtcaacctggacaggcgggtgaaactaccaagctggagtacgg  
taggggcagagggaatccccggtggagcggtgaaatgcattgagatcggaagaacaccaacggcgaaagcactctgctgggccgacactga  
cactgagagacgaaagctaggggagcaaatg

>9f48b0700ca4f9bc731f652161ca7bce

tggggaatcccccgcaatgggcgaaagcctgacggagcaatgccgctggaggtagaggccctgggtcatgaacttctttcccgagaagaa  
aaaatgacggtatccggggaataagcatcggctaactctgtgccagcagccgcgtaagacagaggatgcaagcgttatccggaatgattggg  
cgtaaagcgtctgtaggtggcttttaagttcgtgtcaaataccagggtcaacctggacagggtgtaaaactactaagctagagtacggta  
ggggcagagggaatccccggtggagcgtgaaatgcgtagagatcggaaggaacaccaacggcgaaagcactctgctgggccgacactgaca  
ctgagagacgaaagctaggggagcgaatg

>9f5a3d67e86993d3c9b0e0135701c2da

tggggaatcccccgcaatgggcgaaagcctgacggagcaatgccgctggaggtagaggcctctgggtcatgaacttctttcccgagaagaa  
aaaatgacggtatccggggaataagcatcggctaactctgtgccagcagccgcgtaagacagaggatgcaagcgttatccggaatgattggg  
cgtaaagcgtctgtaggtggcttttaagttcgtgtcaaataccagggtcaacctggacagggtgtaaaactactaagctagagtacggta  
ggggcagagggaatccccggtggagcgtgaaatgcgtagagatcggaaggaacaccaacggcgaaagcactctgctgggccgacactgaca  
c

>9fa34e9fe72a259ec79dfa297ded4eb7

tgaggaatcttctgcaatgggcgaaagcctgacagagcaataccgctgagggatgacggcctgcgggttgtaaacttctttctcaagaaaga  
agatctgacgctacttgaggaataagcatcggctaactctgtgccagcagccgcgtaatacagaggatgcaagtggtattccggaattattggg  
gtaaaagcgtctgtaggtgggcaattaagcttttgcgtgtcaaatactttgggcttaacctaagcgtgcaaaagaaactgtttgcctagagtctgtaga  
ggtaaagggaatccccagtgaggcgggtgaaatgcgtagatattggaaggaacaccaaaggcgaaagcactttactgggtcagtactgacactg  
agagacgaaagctaggggagcaaaaca

>9fc5e219349ec9655d8b7c7cca60749e

tggggaatcttgacaatgggggcaaccctgatccagccattccgctgagtgagaaggccttcgggttgtaaagctctttcagcaggaacga  
aacggtggctccataacgggctaactgacggtacctgaagaagaagcaccggctaactacgtgccagcagccgcgtaatacgtagggtg  
cgagcgttaatacgaattactgggcgtaaagcgtgcgcaggcgggtatataagacagatgtgaaatccccgggcttaacctgggaactgcgtttg  
tgactgtataacttgagtgtggcagaggggggtggaattccacgtgtagcagtgaaatgcgtagagatgtggaggaacaccgatggcgaaggc  
agccccctgggtcaacactgacgctcatgcacgaaagcgtggggagcaaaaca

>a07d3c42790d498fbbdd1f1d8269bbb5

tggggaatatttgacaatgggcgcaagcctgatccagccatgccgctgagtgatgaaggccttagggttgtaaagctctttcaccggtgaaga  
taatgacggtaaccggagaagaagccccggctaactctgtgccagcagccgcgtaatacgaagggggctagcgttggtcgggaattactgggc  
gtaaagcgcacgtaggcgggtatttaagtcagggggtgaaatcccagagctcaactctggaactgcctttgatactgggtacctagagtatggaa  
gaggtaaagtgaattccgagttagagggtgaaattcgtagatattcggaaggaacaccagtggcgaaggcggccttactggtccattactgacgt  
gaggtgcgaaagcgtggggagcaaacaggattagataccctggtag

>a09a81e81834c8edb6d987bba585854d

tggggaatcccccgcaatgggcgaaagcctgacggagcaatgccgctggaggtagaagtcccacgggtcatgaacttctttcccgagaaga  
agcaatgacggtatctggggaataagcatcggctaactctgtgccagcagccgcgtaatacagaggatgcaagcgttatccggaatgattggg  
cgtaaagcgtctgtaggtggcttttaagtcgccgtaaatcccagggtcaactctggacaggcgggtgaaactaccaagctggagtacggta  
ggggcagagggaatccccggtggagcgggtgaaatgcgtagagatcggaagaacaccaacggcgaaagcactctgctgggccgacactgaca  
ctgagagacgaaagctaggggagcgaatg

>a0d41403222d849db9df4541729f6d54

tgaggaaatttgacaacgtatgaaaatatgatccagcaatattgtagaggtgaagaggtaaactgcagagcaggtaggcttttaaacctta  
gttttaatgaagatagtgacgttaattaaaaatttagtcctgactaatttcgtgccagcagtcgcggtgatacggagaggacgagtggtacttgta  
ttgactgggtgtaaagcgtatgtagacgtctaaaaaagtttagatttaaaaatttagttataactaaaaaattctttttatttttagattgagttat  
aagggaagattacagaattttaagtgtaggggtaaaaatccgtttgaaatttaaagactatcaattggcgaaggcagtaattctattataactga  
cgttgagatacagaagcataggtatcgaaca

>a1a24e3152c07f68044dc58b61884e70

tggggaattttggacaatggggcgaagcctgatccagcaatgccgcgtgagtgagaaggccttcgggttgtaaagctctttgtcagggaaga  
aacggtgggagctaatactcctgctaatagcggtacctgaagaataagcaccggctaactacgtgccagcagccgcggtatactaggtggc  
aagcgttaactcggaattactgggcgtaaagcgtgcgcaggcggttttgtaagtctgtcgtgaaatccccgggctcaactgggaattgcgatgga  
gactgcaaggctagaattctggcagagggggtagaattccacgtgtagcagtgaaatgcgtagagatgtggaggaacaccgatggcgaaggc  
agccccctgggtcaagattgacgctcatgcacgaaagcgtggggagcgaaca

>a48196c73921763a9f66211d2e6e1390

tggggaatcttcgcaatggggcgaagcctgacgcagcgacgccgcgtgggggatgaaggccttcgggttgtaaactctttcagcagggaag  
aagccgtgaggtgacggtacctgcagaagaagcaccggctaactacgtgccagcagccgcggtatactaggtgtcgagcgttgtccgaat  
tattgggcgtaaagagctcgtaggtggcggtcacgtcggtgtgaaagccccgggcttaacccgggtctgcattcgatacgggcttgtaggg  
tccggcaggggagactggaattcctggtgtagcggtgaaatgcgcagatatcaggaggaacaccggtggcgaaggcggtctctgggccggt  
ccgacgctgaggagcgaagcgtggggagcgaaca

>a4c2f12c09ff1bdea81d8528ebe741b6

tggggaatcttcgcaatgggggaaaccctgacgcagcaatgccgcgtggaggacgaaggtcttcggattgtaaactccttttcgggggacaa  
atagcggcgtgaataacgccgactgatgtactccgtgaataagccacggctaacttcgtgccagcagccgcggtgaagacgaaggtggcgagc  
gttactcggaattactaggcgtaaagcgtgggcaggcggttttgtaagtctgtctgaaagccccgggctcaacccgggaggtcagtggtgatac  
tgccggacttggtgtgggagaggtgactggaattcctggtgtagcggtgaaatgcgtagatatcaggaggaacaccgatggcgaagcaggt  
cactggaccactatcgacgctcatccacgaaagcgtgggggatcaaaca

>a627f4fe57afccc972a77351fbfb42f8

tggggaatattccgcaatggggcgaagcctgacggagcaatgccgcgtggaggtagaaggcctacgggtcatgaactttttcccgagaaga  
aaaaatgacggtatccggggaataagcatcggtactctgtgccagcagccgcggtgaagacagaggatgcaagcgttatccggaatgattgg  
gcgtaaagcgtctgtaggtggcttttaagttctcgtcaaatcccagggtcaacccctggacaggcggtgaaaactaccaagctagagtacggt  
aggggcagaggaatttccggtggagcgatgaaatgcgtagagatcggaaggaacaccaacggcgaaagcactctgctgggccgacactgac  
actgagagacgaaagctaggggagcaaatg

>a822eed692bc6f11f3e7a953ac0a23e4

tagggaatcttcacaatggacgcaagtctgatggagcaacgccgcgtgagtgagaaggccttcggatcgtaaaactctgttgtagagaaga  
acacgagtgaagtaactgttcattcgatgacggtatctaaccagcaagtcacggctaactacgtgccagcagccgcggtatactaggtggc  
aagcgttgccggatttattgggcgtaaagggaacgcaggcggtcttttaagtctgatgtgaaagccttcggcttaaccggagtagtgattgga  
aactggaagacttgagtgcagaagaggagagtggaactccatgtgtagcggtgaaatgcgtagatatatggaagaacaccagtggcgaagc  
ggctctctggtctgaactgacgctgaggttcgaaagcgtgggtagcaaca

>a86329980f132594bc3933a7b6ffee4c

tggggaatatttgacaatggggcgaagcctgatccagcaacgccgcgtgagggatgacggccttcgggttgtaaactctttcagtagggacga  
agcgcaagtacgggtacctacagaagaagcaccggccaactacgtgccagcagccgcggtatactaggtgtcgagcgttgtccggaattat  
tgggcgtaaagggtcgtaggcggtttgtcacgtcgggagtgaatctcagggtcaacccctgagcctgcttcgatacgggcagactagaggt

atgcaggggagaaacggaattcctggtgtagcgggtgaaatgcgcagatatcaggaggaacaccggtggcgaaggcgggttctctgggcattacct  
gacgctgaggagcgaaagtgtggggagcgaaca

>a87a08f34176a01d56939af85dce7384

tggggaatattgcacaatgggcgaaagcctgatgcagcgacccgctgagggatgaaggccttcgggttgtaaactctttcagcaggggaag  
aagcgaaagtgcgggtacctgcagaagaagcaccggctaactacgtgccagcagccggttaatacgtagggtgcgagcgtgtccggaatta  
ttgggcgtaaagagctttaggcgggtttgtcgcgtctgcagtgaatacgggggtcaaccccgacttctgtgggtacgggcagactagagta  
tggtaggggagaccggaattcctggtgtagcgggtggaatgcgcagatatcaggaggaacaccgatggcgaaggcaggtctctgggcataact  
gacgctgagaagcgaagcatggggagcgaaca

>a9e028a7a419d1c9fd55dcc73423fdf1

tggggaatatttgacaatgggcgcaagcctgatccagcaatgccgcgtgcaggaagaaggccttcgggttgtaaactgctttgtacggagcga  
aaaggctctcttaatacagggggttcatgacggtaaccgtaagaataagcaccggctaactacgtgccagcagccggttaatacgtagggtgc  
gagcgttaatacgggaattactgggcgtaaagcgtgcgcagggcgggtttgtaagacaggcgtgaaatccccgggctcaacctgggaatggcgcttg  
tgactgcaaaagctggagtcgaggcagaggggatggaattccgcgtgtagcagtgaatgcgtagatatgcggaggaacaccgatggcgaagg  
caatcccctgggcctgactgacgctcatgcacgaaagcgtggggagcgaaca

>aa70d7ca71967603d5a9a82c6bf5b9bf

tagggaatattgggcaatggatgcaagtctgaccagccatgccgcgtggaggaagaaggtcctctggattgtaaactcctttgtcggggaag  
aataggcaggatgctcctgtgtgacggtaaccgatgaataagccacggctaactacgtgccagcagccggttaatacgtagggtggcaagc  
gttgcctggattattgggttaaagggtgcgtaggtggtttattaagtcagtggtgaaagctggtgtctcaacaatcaagttgccattgatactga  
tagacttgagagaagtggaggttcatggaatggatggtgtagcggtgaaatgcatagatatcatccagaacgtcgattgcgaaggcagtgggct  
gtacttttctgacactgaggcacgaaagcgtggggatcaaca

>ab8a067bee46678530028fbc97f80daf

tggggaatatttgacaatgggcgcaagcctgatccagccatgccgcgtgagtgtgaaggccttaggggttgtaaagctctttgtccgggaagat  
aatgactgtaccggaagaataagccccggctaacttcgtgccagcagccggttaatacgaaggggctagcgtgttcggaatcactgggcgt  
aaagcgacgttaggcggacttttaagtcagaggtgaaagcctggagctcaactccagaactgcctttgatactgggagtcctgagttcggaaga  
ggttggtggaactgcgagtgtagaggtgaaattcgtagatatcgaagaacaccagtggcgaaggcggccaactggtccgatactgacgctga  
ggtgcgaaagcgtggggagcgaaca

>ac340b3d0a0c7cc4688f5bfbc91c670

tagggaatcttcgcaatggacgaaagtctgacggagcaacccgcgtgtatgaagaagggtttcggatcgtaaagtactgtttagagaaga  
acaaggataagagtaactgttgccttgacggatatcaaccagaaagccacggctaactccgtgccagcagccggttaatacggagggtgc  
aagcgttaatacgggaattactgggcgtaaagcgcgctaggtggtttgataagcgagatgtgaaagccccgggcttaacctgggaacggcatttc  
gaactgtcaggctagagtatggttagaggagtgtggaattcctgtgtagcggtgaaatgcgtagatataggaaggaacaccagtggcgaaggc  
ggcactctggaccaatactgacactgaggtgcgaaagcgtggggagcgaaca

>ac8195c3decdfd4fdf2113d253050c4b

tggggaatatttgacaatgggcgcaagcctgatccagccatgccgcgtgtgtgaagaaggccttttggttgtaaagcactttaagcaggagga  
ggcttacctggttaatacctgggataagtggacgttactgcagaataagcaccggctaactctgtgccagcagccggttaatacagagggtg  
cgagcgttaatacgggaattactgggcgtaaagcgcgctaggcgggtttgtaagtcggatgtgaaatccccgggctcaacctgggaattgcattcg  
atactggcaagctagagtatgggagaggaaggtagaattccaggtgtagcggtgaaatgcgtagagatctggaggaataccgatggcgaagg  
cagccttctggcctaatactgacgctgaggtgcgaaagcatggggagcgaaca

>ad0978ef3bee6a173bb66d94dfab1054

tggggaatcttagacaatgggggaaacctgatctagccatgccgcgtgagcgaatgaaggccttagggtgtaaagctcttctgtaggggaaga  
taatgactgtacccaagaagaagccccggctaactccgtgccagcagccgcggtataacggaggggtagcgttgttcggaattactgggcg  
taaagcgcacgtagcgagaccagaaagtcagaggtgaaagcccagggtcaaccttggaactgcctttgaaactcctggcttgaggtcgaga  
gaggtgagtggaattccgagtgtagaggtgaaattcgtagatattcgagggaacaccagtgggcgaaggcggctcactggctcgatactgacgct  
gaggtgcgaaagcgtggggagcaaaca

>ad7b12e3042568621340521446cc187f

tagggaatcttcgcaatggacgaaagtctgacggagcaacgccgcgtgtatgaagaaggttttcggatcgtaaagtactgtttagagaaga  
acaaggataagagtaactgcttgccttgacggtatctaaccagaaagccacggctaactacgtgccagcagccgcggtataacgtaggtggc  
aagcgttctcggatttattgggtttaaagggtcgtagggggcctttaagtcagtggtgaaagcctgcagcttaactgtagaactgccattgat  
actggaggccttgagtgtactagaggtaggcggaatttatggtgtagcggtgaaatgcatagataccataaagaacaccgatagcgtaggcag  
cttactggagtacaactgacgctgaggcacgaaagcatggggagcgaaca

>ad89a9d5fec4408fab73e7225f44d08

tggggaatattgcacaatggaggaaactctgatgcagcagcgcgcgtgaaggatgaagtatttcggatgtaaacttctatcagcaggggaaga  
aaatgacggtacctgactaagaagccccggctaactacgtgccagcagccgcggtataacgtagggggcaagcgttatccgatttactgggtg  
taaaggagcgtagacggcacggcaagccagatgtgaaagccccggggtcaacccccggactgcatttggaactgctgagctagagtgctgga  
gaggcaagtgaattcctagtgtagcggtgaaatgcgtagatattaggaggaacaccagtgggcgaaggcggcttctgtagcagatgactgacgtt  
gaggctcgaaagcgtggggagcaaaca

>ae760d84b7424a463b2e75dc32ffe09e

tgaggaatattggacaacgtatgaaaatatgatccagcaatattgtagaggtgaagaggtaaactgcagagcaggtaggcttttaaacctta  
gttttaatgaagatagtgacgttaataaaatattagtcctgactaatttcgtgccagcagtcgcggtgatacggagaggacgagtggttacttga  
ttgactgggtgtaaagcgtatgtagacgtctaaaaaagtttagatttaaaatattagttataactaaaaaatttcttttttttttagattgagctat  
aagggaagattacagaattttaagtgttaggggtaaaatccgtttgaaatttaaaagactatcaattggcgaaggcagtaattctattataactga  
cgttgagatacagaagcataggtatcgaaca

>af0ef250af55d02406fed5ed336a5a9a

tggggaattttcgcaatgggcgaaagcctgacggagcaatgccgcgtggaggtggaaggcctacgggtcgtcaacttctttctcgagaaga  
aacaatgacggtatctgaggaataagcatcggttaactctgtgccagcagccgcggttaagacagaggatgcaagcgttatccggaatgattgg  
gcgtaaagcgtctgtaggtggctttcaagtccgctcaaatcccagggtcaacctggacaggcgggtgaaactaccaagctggagtacgg  
taggggcagagggaatttcggtggagcggtgaaatgcattgagatcggaagaacaccaacggcgaaagcactctgctgggccgacactga  
cactgagagacgaaagctaggggagcaaatgggattagataccccagtagt

>affbb89176c9aba1631f271d6c3aea03

tggggaatctcgacaatgggcaaaagcccgatccagcaatatcgcgtagtgagaagggaatgccgcttgtaaagctcttctgtagtgatgc  
gcgatcatgacaggactcgaggaagaagccccgggctaactctgtgccgagcagccgcggtataacgggggggggggcaagtgttcttcggaatg  
actgggcgtaaagggcacgtaggtggtgaattgggttggaagcgaaagtcgcaaaaagtggccgaatgctctcgaaccaattcacttgagt  
gagacagaggatagtgaatttcgtgtgtaggggtgaaatccgtagatctacgaaggaacacaaaagcgaaggcagctctctgggtccatac  
cgatgctgggttcgaaagcatggggagcaaaca

>b00f448acaa36e64a82e7cef6a94b985

tggggaatattgcacaatgggcgaaagcctgatgcagcagcgcgcgtgagggatgaaggccttcgggtgtaaacctcttctagtagggaaga  
agcgcaagtacggtacctacagaagaagcaccggctaactacgtgccagcagccgcggtataacgtaggggtgcgagcgttgcgggaattat  
tgggcgtaaagagctttaggcggtttgtcgcgtctgccgtgaaaaatccggggctcaactccggacttgccgtgggttacgggcagactagagtg  
gtaggggagactggaattcctggtgtagcggtgaaatgcgcagatatacaggaggaacaccgatggcgaaggcaggtctctgggccactactg  
acgctgagaagcgaaagcgtggggagcgaaca



>b02a8d33d018119dedb2db15db887bfd

tggggaatattgcacaatgggcggaagcctgatgcagcaacgccgctgcgggatgacggccttcgggttgtaaaccgctttcgctgtgacga  
agcgtgagtgacggtaatgggtaaagaagcaccggctaactacgtgccagcagccggtgatacgtagggtgcgagcgttgcggatttatt  
gggctaaagggctcgtaggtggtgatcgctcggaagtgaatcttggggcttaaccctgagcgtgctttcgatacgggttgacttgaggaag  
gtaggggagaaatggaattcctggtggagcgggtgaatgcgcagatatcaggaggaacaccagtggcgaaggcggttctctgggcctttctgac  
gctgaggagcgaaagcgtggggagcgaaca

>b2cee3e4eaa128047bfa241265b991b9

tggggaatcttgacaatgggcgaaagcccgatccagcaatatcgctgagtgagaagggaatgccgcttgtaaagctctttcgctgagtg  
gcgatcatgacaggactcgaggaagaagccccggctaactccgtgccagcagccggtgaagatggggggcaagtgttctcggaatgactgg  
gcgtaaagggcacgtaggcggtagaatcggttgaaagtgaagtcgcaaaaagtggcggaatgctctcgaaccaattcacttgagtgcgac  
agaggagagtgaatttcatgtgtagggtgaaatccgtagatctacgaaggaacgcaaaagcgaaggcagctctctgggtccctaccgacg  
ctggggtgcgaaagcatgggagcgaaca

>b315cb5141ac07819043e9fad145d6b2

tagggaatcttcgcaatgggcgaaagcctgacgcagcaatgccgctgcgggacgaaggccctagggtcgtaaaccgctttcagtagggacg  
aaaatgacggtagctgcagaagaagctccggccaactacgtgccagcagccggtgatacgtaggagcaagcgttgcggaattactggg  
cgtaaagggctcgtaggtggtgagtaagtcagatgtgaaatctcaggggccaaccctgagcctgcatttgatactgctctgactagagtcgggt  
aggggagtgcggaactcctggtgtagcggtgaaatgcgcagatatcaggaagaacaccgacagcgaaggcagcactctgggcccgtactgac  
actgaggagcgaaagcatgggtagcaaca

>b350a52b82312cc2209425da69e892a6

tggggaattttcgcaatgggcgaaagcctgacggagcaatgccgctgaaggtagaaggcctacgggtcatgaacttctttccggagaaga  
agcaatgacggtagctcggggaataagcatcggttaactctgtgccagcagccggtgaagacagaggatgaagcgttatccggaatgattgg  
gcgtaaagcgtctgtaggtggcttttaagttcgccgtcaaatcccagggtcaaccctggacaggcgggtgaaactaccaagctggagtacggt  
aggggcagagggaatttcgggtggaacgggtgaaatgcgtagagatcggaagaacaccaacggcgaaagcactctgctgggccgacactgac  
actgagagacgaaagctaggggagcgaatg

>b39a827ea8ca43b654d9adfeefc5b275

tagggaatcttcacaatggacgaaagtctgatggagcaatgccgctgcaggatgaatgccttcgggttgtaaactgctttatgggggagga  
atatgacagtaccccatgaataagcttcggctaactccgtgccagcagccggtcatagagggaagcaagcgttatccggaattattggg  
taaagagatgcgtaggtggttccaaagcaagcatgaaatcatgaggctcaacctcatgactgtgctttgaactgatgaactgagcatgata  
gaggtaaactggaattcctgtgtaggagtgaatccgtagatataaggaggaacaccaatggcgaaggcaggttactggatcattgctgacact  
gaggctcgaaagcgtggggagcgaacg

>b3ecd38f3d8df213c2127f8e68d3d294

ttggaacgactgctaattccctatatgctgaggagtaaaacgggtattaaccgcctaaagatgagcttgctgtgattagctagttggttaaggtaa  
tggcttaaccaaggcgtgatcagtagctggtctgagaggatgatcagccactgggactgagacacggcccagactcctacgggaggcagca  
gtgaggaattttcgcaatgggcgaaagcctgacggagcaataaccgctggaggatgacggcctgtgggtcttaactcctttcttagagaaga  
agttctgacggtagtctaaggaataagcatcggttaactccgtgccagcagccggttaatacgggggatgcaagcgttatccggaatgattggg  
cgtaaagcgtctgtaggtggctttcaagtcaactgtcaaaaatcagggttaaccttgagcc

>b4a04b44d15eec86f0042a9cf38c5c38

tagggaatcttcgcaatggacgaaagtctgacggagcaacgccgctgtatgaagaagggtttcggatcgtaaagtactgttggtagagaaga  
acaaggataagagtaactgcttgccctgacggtagtctaaccagaaagccacggctaactacgtgccagcagccggttaatacgtaggtggc  
aagcgttgcggatttattgggctaaagcgcgcgaggcggtcctttaagtctgatgtgaaatcttcgggtcaaccgcaagcgggtcattgga

aactgggggacttgagtgcagaagaggaaagcggaattccacgtgtagcggtgaaatgcgtagagatgtggaggaacaccagtggcgaaggc  
ggctttctggtctgtaactgacgctgaggcgcgaaagcgtggggagcaaaca

>b4ed8ec9d3313b1ae0b929812511444b

tggggaatattgcacaatgggggaaacctgatgcagcaacccgctgagtgatgacggccttcgggttgtaaagctctgtcttcagggaacga  
taatgacggtactgaggaggaagccacggctaactacgtgccagcagccgcggtataacgtaggtggcgagcgttgcggattactgggcg  
taaaggagcgtagggcggttttaagttagatgtgaaatactcgggcttaacctgagtgctgcatttcaaactggaagtctagagtgcaggag  
aggagaagggaattcctagtgtagcggtgaaatgcgtagagattaggaagaacaccagtggcgaaggcgcttctctggactgtaactgacgct  
gaggctcgaaagcgtggggagcaaaca

>b5253c2c72c07b32a04a07299e586619

tagggaattctggacaatgggcgcaagcttgatccggtgatatcagagaagtgaagaaggtaactccgtaaaacttgattactaaaggagatg  
atgacgttatttagtaaggaagccccggctaactctgtgccagcagccgcggtataacaggaggggctagtgttactcatcatgattgggcgtaa  
agagtatgtaggcggtttgtgaagttgatgaaagtaaaaccagcaaactagaatataggagaggatagccgtattcctagtggagaggtgaa  
atgtgaagatattaggaggacgaacaaaggcgaaggcagctatctggcttataattgacgctgagatacgaagcacgggtagcgaata

>b56f6a907150e6e385a19b1f280594c6

tggggaatattggacaatgggcgcaagcctgatccagccatgccgctgtgtgaagaaggccttttggttgtaaagcactttaagcgaggagga  
ggcttacctggttaataacctgggataagtggacgttactcgagaataagcaccggctaactctgtgccagcagccgcggtataacagggggtg  
cgagcgtaatacgggaattactgggcgtaaaagcgcgtaggcggtttgttaagtcggatgtgaaatccccgggctcaacctgggaattgcattcg  
atactggcaagctagagtatgggagagggaaggtagaattccagggtgtagcggtgaaatgcgtagagatctggaggaataccgatggcgaagg  
cagccttctggcctaatactgacgctgaggtgcgaaagcatggggagcaaacaggattagatacccggttag

>b65beee66f71dd29d3334f00a165fa02

tggggaatattggacaatgggcgaaagcctgatccagcaatatcgctgagtgaaagaaggctattttggttgtaaagctcttctgtaggaaga  
taatgacggtactcgaagaagaagccccggctaactccgtgccagcagccgcggtaaagcggagggggctagtgttattcggaaatgactgggc  
gtaaagggcacgtagcggtgaattaagttgaagtgaaatcccaaagcttaactttggaactgtttcaaaaactgattcactggagttcgatag  
gggtagtggaatttctagttagaataaaattcataaattagaaggaacaccagtggcgaaggcgactatctggatcgatactgacgctg  
aggtgcgaaagcatggggagcaaaca

>b6f3e929dc0a0c2baec219f6bf4a0ab6

tagggaatcttcacaatggacgcaagtctgatggagcaacgccgctgagtgaaagaagggttctggctcgtaaagctctgttgtagtgaaga  
aagatagaggtagtaactggccttatttgacggttaattacttagaaagtcacggctaactacgtgccagcagccgcggtataacgtaggtggca  
agcgttgcggattatttgggcgtaaaagcgagtgacggcggttcaataagctgtagtgaaagccttcggctcaaccggagaattgcatcagaa  
actgttgaaactgagtgacggagaggagagtggaactcctagttagcggtggaatgcgtagatatatggaagaacaccagtggcgaaggcg  
ctctctggtctgcaactgacgctgaggctcgaaagcatgggttagcgaaca

>b7424fffb8b9c2200ef0862f93ed72a0

tggggaatcttgacaatgggcgaaagcccgatccagtaatatcgcatgagtgaaagaagggaatgccgcttgtaaagctcttctgtagtg  
gcgatcataacaggactcgaggaagaagccccagctaactccgtgccagcagccgcggtaaagcggggggggggaagtgttcttcggaatg  
actgggcgtaaaaggcagtaggcggtgaatcggttgaaagtgaagtcgcaaaaagtggcggaatgctcttgaaaccaattcacttgagt  
gagacagaggagagtggaattttgtgtgtaggggtgaaatccgtagatctacgaaggaacgcaaaagcgaatgcagctctctgggtccctac  
cgacgctggggtgcgaaagcatggggagcgaaca

>b77b151f7481fd080bedbf415e736539

tagggaatcttcgcaatggacgaaagtctgacggagcaacgccgctgtatgaagaagggttttcggatcgtaaagtactgttgtagagaaga  
acaaggataagagtaactgcttgccttgacggatctaaccagaaagccacggctaactacgtgccagcagccgcggtataacgtaggtggc

aagcgttgccgatttattggcgtaaaagcgcgcgcaggcggtctttaagtctgatgtgaaagccccggcttaaccggggagggtcattgga  
aactggaagactggagtgcagaagaggagagtggaaattccacgtgtagcggtgaaatgcgtagatatgtggaggaacaccagtggcgaaggc  
gactctctggtctgaactgacgtgaggcgcgaaagcgtggggagcaaca

>b7ae493f11862e60da4e2200e532c7d2

tgaggaatattggtcaatgggagagcctgaaccagccaagtagcgtgcaggaagacggccctatgggttgtaaactgctttgtgcgggaat  
aaagcgggtcacgtgtggcccttgcatgtaccgtacgaataaggaccggctaattccgtgccagcagccgcggtaatacggaaaggtccgggcg  
ttatccgatttattgggtttaaaggagcgttagccgtctcaaagcgtgttgtaaagtccgggctcaaccggggccgtgcagcgcgaactg  
tgagacttgagtgtcggaaggtatgcggaattcgtggtgtagcggtgaaatgcatagatatcacgaagaactccgattgcgaaggcagcatgc  
cgagcattactgacgtgatgctcgaaggtgcgggtatcgaaca

>b885ce70b6fc10105bb5433a7f64009c

tggggaatattgcacaatgggggaaaccctgatgcagccatgccgcgtgtgtgaagaaggccttcgggttgtaaagcactttcagcgaggagga  
aaggtgatacctaatacgtatcagctgtgacgttactgcagaagaagcaccggctaactccgtgccagcagccgcggtaatacggagggtgc  
aagcgttaatcggaattactgggcgtaaaagcgcgcgttagcggcgttgtaagccagatgtgaaagccccgggcttaacctgggaactgcattg  
gaactggcaggctagagtacagaagagggtggtggaatttctgtgtagcggtgaaatgcgtagatataggaaaggaacatcagtggcgaaggc  
ggccacctggtctgatactgacgtgaggtgcgaaagcgtggggagcaaca

>b8cf7d81ea474eb84e3f294bd9d80f18

taaggaatattggacaatggagggaactctgatccagccattccgcgtggaggaagaatgccctatgggttgtaaacttcttttgatgggaata  
aaatgcccttcgagggggaactgaaggtaccatcagaataaagcaccggctaactccgtgccagcagccgcggtaatacggagggtgcgagcg  
ttatccggaattactgggtttaaagggtgcgttaggcggaatttaagtctgggtgaaatattgtggcttaaccataagattgccttgatactgg  
gttcttgaaattgggatgaggatggcggaatgtgacatgtagcggtgaaatgcatagatatgtcatagaacaccaattgcgaaggcagctatctg  
gtctcatattgacgtgaggcacgaaagcgtggggagcgaaca

>b92e8e3439bb67597cb6567326e109c9

tgaggaatattggacaatgggagggagcctgatccagccatgccgcgtgcaggaagacggccctatgggttgtaaactgctttgcacgggaag  
aaacacccccctcgagggggcctgacggtaccgtgagaataaggtacggctaactccgtgccagcagccgcggtaatacggaggatccgagc  
gttatccggaatcattgggtttaaagggtccgttaggtggacggttaagtacgggtgaaatcccgagctcaactgtggaattgccttgatactg  
gtcgtcttgagtctgtgaagtgggtggaatatgtagtgtagcggtgaaatgcatagatatgtcatagaacaccgattgcgaaggcagaccact  
aacgacgtactgacactgatggacgaaagcgtggggagcgaaca

>b96ea3fbd5dff31db3519d849c438acf

tagggaatcttcgcaatggacgaaagtctgacggagcaacgccgcgtgtatgaagaaggtttcggatcgtaaagtactgtttagagaaga  
acaaggataagagtaactgcttgccttgacggtatctaaccagaaagccacggctaactacgtgccagcagccgcggtaatacgtagggtggc  
aagcgttgccgatttattggcgtaaaagcgcgcgcaggcggtctttaagtctgatgtgaaagccccggcttaaccggggagggtcattgga  
aactggaagactggagtgcagaagaggagagtggaaattccgagtgtagaggtgaaatcgtagatatcggaggaacaccagtggcgaaggc  
ggctcactggctgatactgacgtgaggtgcgaaagtgtggggagcaaca

>b9cc3361a2632915ea0bffd368b4a3d6

tggggaatattgcacaatgggagaaagcctgatgcagccatgccgcgtgtgtatgaaggccttagggttgtaaactttcatcggtgaagat  
aatgacggtagccgaagaagaagccccggctaactccgtgccagcagccgcggtaatacggagggggcaagcgttgttcggaattactgggcg  
taaagcgcgcgtaggcgactggtcagttgggggtgaaatcccgaggctaactcggaactgcttcaactgccaagtcttagatcggaag  
aggtagtggaattcctagtgtagaggtgaaattcatagatatagggaagaacaccagtggcgaaggcggctcactggtccgatactgacgtg  
aggtgcgaaagcgtggggagcgaaca

>b9d614025bf292dfb0db9f43d7357e14

tgaggaatattggacaatgggtgagagcctgatccagccatcccgcgtgaaggacgacggccctatgggttgtaaacttctttgtataggata  
aacctactctcgtgagagtagctgaaggtagctatacgaataagcaccggctaactccgtgccagcagccggttaatacggagggtgcaagcgt  
tatccggatttattgggttaaagggtccgtaggcggtatctgtaagtcagtggtgaaatctcacagcttaactgtgaaactgccattgatactgca  
ggctcttgagtggttgtaagtagctggaataagtagttagcggtgaaatgcatagatattacttagaacaccaattgcgaaggcaggttactaa  
gcaacaactgacgctgatggacgaaagcgtggggagcgaaca

>b9edf27fc18aeed5186afda3a4ef895

tagggaatccccacaatgggcgaaagcctgatggagcaacgccgcgtgcaggatgaaggccctcgggtcgtaaactgcttttatatgtgacga  
atatgacggtagcatatgaataaggatcggtactccgtgccagcagccggtcatacggaggatccaagcgttatccggaattactgggcg  
taaagagttgcgtaggtggcatagtagtctgttagtgaaagcgtgtggctcaaccatatacacattacagaaactgtaagctagaggcgaga  
gagtaactagaattcctagtagtaggagtggaatccgtagatattaggaggaataccgatggcgtaggcaggttactggctctccctgacacta  
aggcacgaaagcgtggggagcgaacg

>ba18621ad8282f2a59949d728a39e949

tggggaatccccgcaatgggcgaaagcctgacggagcaatgccgcgtggaggtagaggccctgggtcatgaacttctttccggagaagaa  
aaaatgacggtagtatccggggaataagcatcggtactctgtgccagcagccggtgaagacagaggatgcaagcgttatccggaatgattggg  
cgtaaagcgtctgtaggtggcttttaagttcgtgtcaaataccagggctcaaccctggacaggtggtgaaaactactaagctagagtacggta  
ggggcagagggaatttccggtggagcgatgaaatgcgtagagatcggaaggaacaccaacggcgaaagcactctgctgggcccgaactgaca  
ctgagagacgaaagctaggggagcgaatgggattagataccctgtagt

>ba30115f693ccfea9103a1b04d08c0c2

taaggaatattggacaatggacgaaagtctgatccagccatgccgcgtgaaggattaaggtcctctggattgtaaacttcttttatatgggacga  
aaaaagggcatttctgttacttgacggtaccatatgaataagcaccggctaactccgtgccagcagccggttaatacggagggtgcaagcgt  
tatccggattcactgggttaaagggtgcgtaggcggttagataagtcagtggtgaaatctcgagcttaactccgaaactgccattgatactatt  
tatcttgaatatttgtagggttgcggaatatgtcatgtagcggtgaaatgcttagatatgacatagaacacctattgcgaaggcagcaggctac  
gcatatattgacgctgaggcacgaaagcgtggggatcaaaca

>ba36086e9292cf0adc3cc339fe964f1d

tggggaatccccgcaatgggcgaaagcctgacggagcaatgccgcgtggaggtagaaggccacgggtcctgaacttctttccagagaaga  
agcaatgacggtagtatcggggaataagcatcggtactctgtgccagcagccggtgaatacagaggatgcaagcgttatccggaatgattggg  
cgtaaagcgtctgtaggtggcttttaagtcgcgtcaaatcccagggctcaaccctggacagggcgtgaaactaccaagcttgagtacggta  
ggggcagagggaatttccggtggagcggtgaaatgcgtagagatcggaagaacaccaacggcgaaagcactctgctgggcccgaactgaca  
ctgagagacgaaagctaggggagcgaatg

>bac3db3ffb89bae882811e6139a4861a

tggggaatccccgcaatgggcgaaagcctgacggagcaatgccgcgtggaggtagaaggccacgggtcgtgaacttctttccggagaaga  
agcaatgacggtagtatcggggaataagcatcggtactctgtgccagcagccggtgaatacagaggatgcaagcgttatcgggaatgattgg  
gcgtaaggcgtctgtaggtggctttcaagtcgcgtccaatcccagggctcaaccctggacagggcgtgaaactaccaagctggagtacgg  
taggggcagagggaatttccggtggagcggtgaaatgcgtagagatcggaagaacaccaacggcgaaagcaccctgctgggcccgaactga  
cactgagagacgaaagctaggggagcgaatgggattagatacccgata

>bcf1ff7652c847af1c4e33b471a8ae4d

tagggaatctccacaatggacgcaagtctgatggagcaacgccgcgtgagtgagaagggttttcggatcgtaaagctctgttgggtgaaga  
aggtagaggtagtaactggcctttatttgacggtaataccagaaagtcacggctaactacgtgccagcagccggttaatacgcagggtggc  
aagcgttgcggatttattgggctaaagcgagcgagcggaagaataagtcgtatgtgaaagccctcggcttaaccgaggaactgcatcgg  
aaactgttttcttgatgcagaagaggagagtggaactccatgtgtagcggtggaatgcgtagatatatggaagaacaccagtggcgaaggcg  
gctctctggctgcaactgacgctgaggctcgaagcatgggttagcgaaca

>bd627be18e8b3b0e6f31fc13897d2d0d

tgaggaaatttgggcaatggacgcaagtctgaccagcaacgccgctggaggatgaaggcttttgattgtaaactccttttcagggggaaga  
gtgaggacgggtacctgagaataagtcacggctaactacgtgccagcagccggttaatacgtaggtgacgagcgttatccggatttattgggc  
gtaaagcgcacgcaggcggcttgacaagtctgacgtgaaatctccggcttaactgggagcggctgttgaaactgtcgagcttgaggcgatga  
gaggggtgtggaattcccgggtgtagtggtggaatgcgtagatatcggggggaacatcagtggcgaaaaggcgaccctggcattagcctgacgct  
catgtgcgaaagcgtggggagcgaacg

>bd79f81fc2537c2a4203a8cac6a44c3c

tggggaattttccgcaatgggcgaaagcctgacggagcaatgccgctggaggtagaaggccacgggtcatgaacttctttccggagaaga  
agcaatgacggtatctggggaataagcatcggtactctgtgccagcagccggttaatacagaggatgcaagcgttatccggaatgattggg  
cgtaaagcgtctgtaggtggcttttaagtccgctcaaatcccagggtcaactctggacaggcgggtggaaactaccaagctggagtacggt  
ggggcagagggaatttccgggtggagcgggtgaaatgcgtagagatcggaagaacaccaacggcgaaagcactctgctgggccgacactgaca  
ctgagagacgaaagctaggggagcgaatgggattagatccccagtag

>be0979510db98021cb356a50f8b03f5b

tggggaatattgggcaatggacgaaagtctgaccagcaacgccgctgggggatgaaggccttagggtgttaaactcctttattagggaaga  
tagtgacggtacctaataagcatcggtactctgtgccagcagccggttaatacgaaggatgctagcgttactcggaattactgggcgt  
aaagaatgcgtagggcggtcatttaagttgatatgcaatcccaagcttaacttaggaattgctatcaaaactaaatgccttgaatatgaaggg  
agcaagggaattcctggtgtaggggtaaaaatccgtagatatcaggaggaagaccggaagcgaaagcgttctggttcattattgacgctgag  
gcatgaaagcgtggggatcgaaca

>be31ea1de761f3757a78eb2fed4ef9b3

tggggaattttccgcaatgggcgaaagcctgacggagcaatgccgctggaggtagaaggccacgggtcatgaacttctttccggagaaga  
agcaatgacggtatctggggaataagcatcggtactctgtgccagcagccggttaatacagaggatgcaagcgttatccggaatgattggg  
cgtaaagcgtctgtaggtggcttttaagtccgctcaaatcccagggtcaactctggacaggcgggtggaaactatcaagctggagtacggt  
ggggcagagggaatttccgggtggagcgggtgaaatgcgtagagatcggaagaacaccaacggcgaaagcactctgctgggccgacactgaca  
ctgagagacgaaagctaggggagcgaatg

>bf2da96267afcee99ff82053cd18af28

tggggaatattggacaatgggcgcaagcctgatccagccataccgctgggtgaagaaggccttcgggtgttaaagccctttgttgggaaaga  
aaagcagtcggctaatacccgtattgtctgacggtacccaaagaataagcaccggctaactctgtgccagcagccggttaatacgaagggtgc  
aagcgttactcggaattactggcgtaaagcgtgcgtaggtggtttgttaagctgctgtgaaagccctgggctcaactgggaattgagtggt  
actggctgactagaatgtggcagagggttagcggaattcctggtgtagcagtgaaatgcgtagagatcaggaggaacatccgtggcgaaaggcgg  
ctacctgggccaacattgacactgaggcacgaaagcgtggggagcaaca

>bf369c9bcb5d821045ed2cb045eb99ff

tgggggatattgcacaatgggcgcaagcctgatgcagcgacgccgctgagggatgacggcttctgggtgttaaactccttctgctaccgaaca  
agggtccatattggtggggttgagggtaggtggataagaagcgggctaactacgtgccagcagccggttaatacgtaggcgcgagcgtt  
gtccggaattattggcgtaaagagctcgtagcggttgcgctctgctgtgaaaacgcgggcttaactccgcgctgcagtgggtacgggc  
aggctagagtgtgtaggggtgactggaattcctggtgtagcggtggaatgcgcagatatcaggaggaacaccgatggcgaaaggcaggtcact  
gggccattactgacgtgaggagcgaaagcatggggagcgaaca

>c01af9824c4da0da698e80bdda2f9f7e

tggggaatattgcacaatgggggaaaccctgatgcagccatgccgctgtgtgaagaaggccttcgggtgttaaagcactttcagcgaggagga  
aaggttagtagttaataactgtagctgtgacgttactgcagaagaaggaccggctaactccgtgccagcagccggttaatacgggggatgc  
aagcgttatccggaatgattggcgtaaagcgtctgtaggtggcttttaagtccgctcaaatcccagggtcaactctggacaggcgggtgga

aactaccaagctggagtagcgttaggggcagaggggaatttccggtggagcgggtgaaatgcgtagagatcggaagaacaccaacggcgaaag  
cactctgctgggccgacactgacactgagagacgaaagctaggggagcgaatg

>c05eb66ecce9bbb304ac580f4d29fdf2

tagggaattttccgcaatgggcgaaagcctgacggagcaataccgcgtgagggatgacggcctatgggttgtaaactcttttccaggagga  
ataaatgacgtgtacctgaagaataagcatcggctaactctgtgccagcagccgcggtgaagacagaggatgcaagcgttatccggaatcactg  
ggcgtaaagcgtctgtaggtggcttaataagcaactgttaaatcttgaggctcaacctcaaaaccgagtcgaaactattagactagagtatag  
taggggtaaagggaatttccagtgaggcgggtgaaatgcgtagagattggaaggaaacaccgatggcgaaggcactttactgggctattactaac  
actcagagacgaaagctagggtagcaaatg

>c0975f7ca5988524fffc584723730284

tggggaattttccgcaatgggcgaaagcctgacggagcaatgccgcgtggagggtggaaggcctacgggtcgtcaacttcttttccggagaaga  
aacaatgacggtatctgaggaataagcatcggctaactctgtgccagcagccgcggtgaagacagaggatgcaagcgttatccggaatgattgg  
gctgtaaagcgtctgtaggtggctttcaagtcgccgctcaaatcccagggtcaacctggacaggcgggtggaactaccaagctggagtagcg  
taggggcagaggggaatttccggtggagcgggtgaaatgcattgagatcggaagaacaccaacggcgaaagcactctgctgggccgacactga  
cactgagagacgaaagctaggggagcaaatg

>c0c1191d62430ccb0ca9d73a686a0896

taaggaatattggtcaatggaggggaactctgaaccagccatcccgcgtgcaggatgaaggggctctgccctgtaaactgcttttgatgggacg  
aaaaagcctcacttgtgaggaactgacggtaccattagaataagcaccggctaactccgtgccagcagccgcggtgaatacggagggtgcaagc  
gttatccggaatcactgggttaaaagggtgcgtaggcgggtgtataagtcagtggtgaaaggccgtagcttaactatgggattgccattgatactg  
tatgacttgaatgaggttagggtggcggaatgtggcatgtagcggtgaaatgcttagatatgccatggaacatcgattgcgaaggcagctgact  
ggacctgaattgacgtgaggcacgaaagcgtggggagcgaaca

>c0c787f2760226e8a202506f0f0a65a1

tggggaattttccgcaatgggcgaaagcctgacggagcgacaccgcgtggaggatgaaattttcggaatgtaaactccttttgaggaatga  
aacaatgacagtacctgcagaataagcatcggctaactctgtgccagcagccgcggtgaatacgtaggatgcaagcgttgttcggaattactgg  
gctgtaaagagtacgtaggcggtaatgaaagtctgatattaagactggggcttaacctcaggagtgtatcggaacttcataactagaggacag  
tagaggaaattggaattccagtgtagcggtgaaatgcgtagatatgggaggaacaccagtggcgaaagcgaatttctgggctgttactgacg  
ctgaggtacgaaagtgtggggagcaaac

>c1a0da0199a33d0c570b5e086c8ebc8a

tggggaattttccgcaatgggcgaaagcctgacggagcaatgccgtgtggagggtggaaggcctacgggtcgtcaacttcttttccggagaaga  
aacaatgacggtatctgaggaataagcatcggctaactctgtgccagcagccgcggtgaagacagaggatgcaagcgttatccggaatgattgg  
gctgtaaagcgtctgtaggtggctttcaagtcgccgctcaaatcccagggtcaacctggacaggcgggtggaactaccaagctggagtagcg  
taggggcagaggggaatttccggtggagcgggtgaaatgcattgagatcggaagaacaccaacggcgaaagcactctgctgggccgacactga  
cactgagagacgaaagctaggggagcaaatg

>c3b6ad1498373be0fca2a0eb8eed482d

tgaggaattttccgcaatgggcgaaagcctgacggagcaataccgcgtgaaggatgaaggcctatgggttgtaaacttcttttccagagaaga  
attttgacggtatctgaggaataagcatcggctaactctgtgccagcagccgcggtgaagacagaggatgcaagcgttatccggaatgattggc  
gtaaagcgtctgtaggtgggtttcaagtctttgtcaaagatcagggcctaacctgggcaggcagaagaactaatagacttgagttcggtag  
gggcagaggggaattcccgggtggagcgggtgaaatgcgtagagatcgggaggaacaccaaaggcgaaggcactctgctgggccgtaactgacac  
tgagagacgaaagcagggtagcaaatg

>c4e200f2a1ad9a8651964946dccf41c9

tagggaatttccacaatgggcgaaagcctgatggagcaacgccgctgcaggatgaatgccttcgggttgtaaactgcttttattagtgaaaga  
tatgacggtaactaatgaataagggctggctaactacgtgccagcagccggtcatagtaggacccaagcgttatccggaattactgggcgt  
aaagagttgcgtaggtggcatgataagtggagtgtgaaagcgtgcggctcaaccgcatatccgcattccaaactattaagcttgagtatgagag  
aggtagatggaatcttagttaggagtgaaatccgtagatattagaaggaacaccgatggcgtagggcagctactggctcattactgacactaa  
ggcacgaaagcgtggggagcgaaca

>c50cc6d44589d46a41a1ea21be2db653

tggggaatattggacaatgggcgcaagcctgatccagccatgccgctgtgtgaagaaggccttcgggttgtaaagcacttttgttggggaaga  
aacggaccggaattaacttcgggttgatgacggtaaccaagaataagcaccggctaacttcgtgccagcagccggttaatacgaagggtgc  
aagcgttactcggaattactggcgtaaagcgtgcgtagggcgtttgttaagtctgtcgtgaaagccccgggctcaacctgggaatggcgatgga  
tactggcaagctagagtgtgcagaggatgggtggaattcccggtgtagcggtgaaatgcgtagagatcgggaggaacaccagtggcgaaggcg  
gccatctgggacaacactgacgctgaggcacgaaagcgtggggagcaaca

>c70dfc304c4f13c14c44e516b8165dbc

tgaggaatattggacaatggacgcaagtctgatccagccatgccgctgcaggaagaatgccctatgggttgtaaactgcttttatttgggaata  
aaccctctacgtgtagagggctgaaggtaccaaacgaataagcaccggctaactccgtgccagcagccggttaatacggaggggtgaagcg  
ttatccggaatcattgggtttaaagggtccgcagggcgacgtataagttagtggtgaaagcctacagcttaactgtagaactgccattgatactgt  
acgtctgaattcggtcgaagtgggcggaatgtgtcatgtagcggtgaaatgcatagatatgacacagaacaccgatagcgaaggcagctcact  
aggcctgaattgacgctcaggacgaaagcgtggggagcgaaca

>c7db868cd7f9b9b7cf55b2fa9bb51e7f

tggggaatttccgcaatgggcgaaagcctgacggagcaatgccgctgaaggtagaaggcctacgggtcatgaacttctttcccgagaaga  
agcaatgacggatccggggaataagcatcggttaactctgtgccagcagccggttaagacagaggatgaagcgttatccggaatgattgg  
gcgtaaagcgtctgtaggtggccttttaagtccgctcaaatcccgaggctcaacctggacaggcgttgaaactaccaagctggagtacggt  
aggggcagaggggaattccgggtggagcggtgaaatgcgtagagatcggaagaacaccaacggcgaaagcactctgctgggccgacactgac  
actgagagacgaaagctaggggagcgaatg

>c80ffca7f4952e3e9f8d0e1b3b405702

cgaggaatttccgcaatgggcgaaagcctgacggagcaataccgctggaggatgacggcctgtgggtcttaaactcctttcttagagaaga  
agttctgacggatctaaggaataagcatcggttaactccgtgccagcagccggttaatacgggggatgaagcgttatccggaatgattggg  
cgtaaagcgtctgtaggtggcctttcaagtcaactgtcaaaaatcagggttaaccttgagccggcagttgaaactatgaagcttaggttagta  
ggggcagaggggaattcctagttagcggtgaaatgcgtagatattaggaagaacaccaatcgcgaaagcactctgctgggccatgactgacac  
tgagagacgaaagctaggggagcgaatg

>c8101d4116a4b2ca40592e2f0ca8d845

tagggaatcttcgcaatggacgaaagtctgacggagcaacgccgctgtatgaagaaggtttcggatcgtaaagtactgtttagagaaga  
acaaggataagagtaactgcttgccttgacggatctaaccagaaagccacggctaactacgtgccagcagccggttaatacgtaggtggc  
aagcgttgcggatttattgggcgtaaagcgcgcgaggcgtcttttaagtctgatgtgaaagccccgggcttaaccggggagggtcattgga  
aactggaagactggagtgcagaagaggagagtggaactccatgtgtagcggtggaatgcgtagatatatggaagaacaccagtggcgaaggc  
ggctctggtctgcaactgacgctgaggctcgaaagcatgggttagcgaaca

>c84530ba77f10f52ddc0d7636863cc48

tagggaatcttcgcaatggacgaaagtctgacggagcaacgccgctgtatgaagaaggcctgcgggttgtaaagcacttttagtggggagg  
aaggccgccacctaatactgcggaggattgacttaaccacagaaaaagcaccggctaactctgtgccagcagccggttaatacagagggt  
gcgagcgttaatcggaattactggcgtaaagcgtgcgtagggcgtttcgtaagtgcgggtgtgaaagccccgggctcaacctgggaattgcattc  
gagactgcggagctggagtgcggaagagggaagtggaatttcgggtgtagcggtgaaatgcgtagatatcggaaggaacatcagtggcgaaa  
gcgacttctggtccagcactgacgctcaggcacgaaagcgtggggagcaaca

>c8501fa5cc4855dfe465623dc2c73870

tggggaatccccgcaatgggcgaaagcctgacggagcaatgccgcgtggaggtggaaggcctacgggtcgtcaacttcttttctcggagaaga  
aacaatgacggtacctgaggaataagcatcggtactctgtgccagcagccgcggttaagacagaggatgcaagcggttatccggaatgattgg  
gcgtaaagcgtctgtaggtggctttcaagtcgccgtcaaataccagggtcaaccctggacagggcgggtggaaactaccaagctggagtacgg  
taggggcagagggaatccccggtggagcggtgaaatgcattgagatcggaagaacaccaacggcgaaagcactctgctgggccgacactga  
cactgagagacgaaagctaggggagcaaatg

>caf9ced72cd2c9f89c4e5cde99148906

tggggaatccccgcaatgggcgaaagcctgacggagcaatgccgcgtggaggtagaaggccacgggtcgtgaacttcttttccggagaaga  
agcaatgacggtatctgaggaataagcatcggtactctgtgccagcagccgcggttaagacagaggatgcaagcggttatctggaatgattgg  
gcgtaaggcgtctgtaggtggctttcaagtcgccgtcaaataccagggtcaaccctggacagggcgggtggaaactaccaagctggagtacgg  
taggggcagagggaatccccggtggagcggtgaaatgcgtagagatcggaagaacaccaacggcgaaagcaccctgctgggccgacactga  
cactgagagacgaaagctaggggagcgaatgggattagatacccgagta

>cb3a451b5f9718c07b491a77b14ef21f

tggggaatattgcacaatgggggaaaccctgatgcagccatgccgcgtgtgtgaagaaggccttcgggttgtaaagcactttcagcgaggagga  
aaggttgatacctaatacgtatcagctgtgacgttactgcagaagaagcaccggctaactccgtgccagcagccgcggttaacggagggtgc  
aagcgttaatcggaattactggcgtaaagcgacgcagggcgggttgataagttagatgtgaaagccccgggtcaacctgggaattgcattta  
aaactgtccagctagagcttctgtagagggggtagaattccaggtgtagcggtgaaatgcgtagagatctggaggaataccgggtggcgaaggc  
ggccccctggacaaagactgacgctcaggtgcgaaagcgtggggagcaaaca

>cba8447928c66779a8044e22687ec0d4

tggggaatcttagacaatgggggaaaccctgatctagccatgccgcgtgagcgatgaaggccttaggggttgtaaagctctttcagtggggaaga  
taatgacggtagccacagaagaagccccggctaactccgtgccagcagccgcggttaacggaggggtagcgttggttcggaattactgggc  
gtaaagcgcacgttagggcggactggaaagtcagaggtgaaatccagggtcaaccttggaactgcctttgaaactcctggtcttgaggtcgaga  
gaggtgagtggaattccgagtgtagaggtgaaattcgtagatattcggaggaacaccagtggcgaaggcggctcactggctcgatactgacgct  
gaggtgcgaaagcgtggggagcaaaca

>cd16616c1eb974160069008dab2002b0

ctaggaatattggacaatgggcgaaagcctgatccagcaacaccgcgtggaggacgaaggccttcgggtcgtaaactccttttggggggatga  
gaacggacagtacccccagaataaggccccggctaactcgtgccagcagccgcggttaacgtaggggccaagcggttatccggaattactggg  
cgtaaagcgcagcttagggcgtctactaagtcggacgtgaaagtcctggctcaactagggagaggtcgttcgaaactagtagactagaggggtgt  
agaggagagcgggaattccaggtgtagcggtgaaatgcgtagatatctggaggaacaccagtggcgaaagcggctctctggccactcctgacg  
ctgagatgcgaaagccaggggagagaacg

>ce269bc5e6f5fb15085bb532e1c2d276

ttaggaatccccgcaatgggggaaaccctgacgcagcaacgccgcgtgaaggatgaaggccttcgggtcgtaaactccttttagcaggggaaga  
aaaaaatgacggtatctgcagaaaaagcaccggctaactctgtgccagcagccgcggttaacagagggtgcaagcggttatccggaatcactg  
ggcgtaaagagctcgtagggcgggttaattaagtcgaatgtgaaagccctgggtcaatccaggaagtgcattcgatactgattgactggagtgc  
ggagaggaaagcgggaattccaggtgtagaggtgaaattcgtagatatctggaggaacaacagaagcgaaggcggcttctggactgtcactga  
cgctgaggagcgaagcgtggggagcaaaca

>cf2e322a70d56572cbb6f07c13572a06

caagggaatccccgcaatgggcgaaagcctgacggagcaacgccgcgtgggtgatgacgctttcggagtgtaaagcccttttctcaggggaaga  
acacaatgacggtacctgaggaataaggaccggctaactcgtgccagcagccgcggttaacgtaggggtccaagcggtgtccggagtactg  
ggcgtaaagcgcgcgcagggcgggttcgataagactggcgtgaaagccccgggtcaaccggggagggtcgttggtgactgtcggaactgaagac



agcaggggcaggtggaattcccggtgtagtggtgaaatgcgtagagatcgggaggaacacccgtggcgaaggcggcctgctgggctgttcttg  
acgctgaggcgcaaggcgtggggagcgaacg

>cf327843fd016333cfe51889752981a9

tggggaatTTTggacaatggggcgaagcctgatccagcaatgccgcgtgcaggacgaaggccttcgggttgtaaactgctttgtacggaacga  
aacggtctcttctaatacaaggggctaatagcggtaccgtaagaataagcaccggctaactacgtgccagcagccgcggtataacgtaggggtgc  
gagcgttaatcggaattactgggcgtaaagcgtgcgcaggcggttatataagacagatgtgaaatccccgggctcaacctgggacctgcatttgc  
gactgtatagctagagtagcgttagagggggatggaattccgcgtgtagcagtgaatgcgtagatatgcggaggaacaccgatggcgaaggca  
atccccctggacctgtactgacgctcatgcacgaaagcgtggggagcaaca

>d026ba8391312cd4726993268770b541

tggggaatTTTggacaatgggggcaaccctgatccagcaatgccgcgtgtgtgaagaaggccttcgggttgtaaagcactttgtccgggaaga  
aatcgcacctgataataccgggtgtggatgacggtaccggaagaataaggaccggctaactacgtgccagcagccgcggtataacgtaggggtc  
caagcgttaatcggaattactgggcgtaaagcgtgcgcaggcggttgtgaagaccgatgtgaaatccccgggcttaacctgggaattgcattg  
gtgactgcacggctagagtgtgtcagaggggggtagaattccacgtgtagcagtgaatgcgtagagatgtggaggaataccgatggcgaagg  
cagccccctgggataaacactgacgctcatgcacgaaagcgtggggagcaaca

>d09be871b5a4eb743216a6382df2aa50

tagggaatcttccgaatggacgaaagtctgacggagcaacgccgcgtgtatgaagaaggTTTTcggtatcgtaaagtactgttggtagagaaga  
acaaggataagagtaactgcttgccttgacggtatctaaccagaaagccacggctaactacgtgccagcagccgcggtataacgtaggggtgc  
gagcgttaatcggaattactgggcgtaaagcgtgcgcaggcggtcatgcaagacagaggtgaaatccccgggctcaacctgggaactgcctttg  
tgactgcattggctggagtgcggcagagggggatggaattccgcgtgtagcagtgaatgcgtagatatgcggaggaacaccgatggcgaagg  
caatccccctgggcctgactgacgctcatgcacgaaagcgtggggagcaaca

>d10cb323cc534bb09847cc22d4467f75

tagggaatcttccgaatggacgaaagtctgacggagcaacgccgcgtgtatgaagaaggTTTTcggtatcgtaaagtactgttggtagagaaga  
acaaggataagagtaactgcttgccttgacggtatctaaccagaaagccacggctaactacgtgccagcagccgcggtataacgtaggtggc  
aagcgttgcggatttattgggtttaaagggtgcgtagcggtgtttaagttagtgaaagactccggctcaaccggagcagtgccattgat  
actggacagcttgagtattggaggggtacatggaattgatgtgtgtagcggtgaaatgcatagataccatcaggaacaccgatagcgaaggcatt  
gtactggccaataactgacgctgatgcacgaaagcatgggtagcgaaca

>d1e7dc710b2c81174163cc4bd364f4ec

tggggaatatttTgcaatgagcgcaagcttgacaaagtatcgtcacgtgttaggaagaaggctttataagtgttaaactcttttgcctaaaagtg  
aatattgacacttaagtataaaaagtatcggcaaacctccgtgccagcagccgcggtataacgggggatacaagcgttatccggaattactgggc  
gtaaagcgtatgtaggtggtttatctatttttaattaaataaaaactatataaatgttttttaaaaatattattaaacttgagtatgttaggggtaa  
aaggaattcttgagaagtgggtgaaatgcgaagatacaagaggaagaccgaaagcgaagcattttactggagcattactgacactgagata  
cgaaagttaaggtagcgaatg

>d2a847b8ff36676ce1bb763b7afa7d60

tggggaatattggaatggggcgaagcctgatccagcaatgccgcgtgtgtgaagaaggcccgagggttgtaaagcacttttatgagtaaag  
aaaagttaaagattaactctttaaccctgacggttaactcaggaataagcaccggctaactccgtgccagcagccgcggtataacggagggtg  
caagcgttaatcggaattactgggcgtaaagcgtccgtaggtggcttgtcaagttggatgtgaaagcccagggtcaaccttggaattgcatcca  
aaactggctcgtagagtatgtgagaggggggtagaatttctgggtgtagcggtgaaatgcgtagagatcagaaagaataccgatggcgaaggc  
aacccttggcgcaatactgacactgagggagcgaagcgtggggagcaaca

>d2d2476686676334f7f06d3a89bbfcd7

tggggaatccccgcaatgggcgaaagcctgacggagcaatgccgcgtggaggtagaaggccacgggtcgtgaactcttttccgggagaaga  
agcaatgacgggtatctggggaataagcatcggtactctgtgccagcagccgcggtatacagaggatgcaagcgttatccggaattattggg  
cgtaaagcgtctgtaggtggccttttaagtccgcgtcaaatcccagggctcaaccctggacagcggtggaaactaccaagctggagtagcgt  
aggggagaggggaatccccggtggagcggtgaaatgcgtagagatcggaagaacaccaacggcgaaagcactctgctgggccgacactgac  
actgagagacgaaagctagggtagcgaatg

>d385f1d5c383b338966e78c8682f5d25

tagggaatcttcgcaatggacgaaagtctgacggagcaacgccgcgtgtatgaagaaggttttcggatcgtaaagtactgttggtagagaaga  
acaaggataagagtaactgcttgccttgacggatcttaaccagaaagccacggctaactacgtgccagcagccgcggtaacacgaaccgga  
caaactgtattcggaattattgggcttaaagggtgcgtagcggtgcggtaaagttaggtgtgaaatccctcggtcaaccagggaattgcgcttc  
atactgccgtgctggaggagacaggggtaagcggaactgatggtagcggtgaaatgcgttgatatcatcaggaacaccggtggcgaaag  
cggcttactgggtctctctgacgctgaggcacgaaagctagggtagcgaacg

>d4a11d35318fb9ee1f6faca38687f563

tggggaatattggacaatgggcgcaagcctgatccagccatgccgcgtgagtgatgaaggccttaggggtgtaaagctctttgtccgggacgat  
aatgacggtagcgggaagaataagccccggctaacttcgtgccagcagccgcggtatacgaaggggtagcgttgcctcggaatcactgggcg  
taaaggcgcgtaggcggttgaagtgggggtgaaagcccgtagcgaaccacggaattgccttcgatactgcttggcttgagtggttaga  
ggttggtggaactcgagtgtagaggtgaaattcgtagatattcgcaagaacaccggtggcgaaaggcgccaactggaccatcactgacgctg  
aggcgcgaaagcgtggggagcaaca

>d589e65202082f7f71dcaa9c10829fdf

tggggaatcttagacaatgggggaaaccctgatctagccatgccgcgtgagtgatgaaggccttaggggtgtaaagctctttcagctgggaagat  
aatgacggtagcagagaagaagccccggctaactccgtgccagcagccgcggtatacggaggggtagcgttgttcggaattactgggcg  
taaagcgacgtaggcgactgaaaagttggaggtgaaatccagggctcaaccctggaactgccttcaaaactatcagctggagttcgagag  
aggtagtggaattccgagtgtagaggtgaaattcgtagatattcgagggaacaccagtgggcgaaaggcggtcactggctcgatactgacgctg  
aggtagcgaagcgtggggagcaaca

>d6bc012209f57dc63c548dc423183f2f

tgaggaaatttgacaatgggagagcctgatccagccatgccgcgtgcaggaagactgccctatgggtgtaaactgctttatacaggaag  
aaaccactttacgtgtagagtgctgacggtagtgaagaataaggatcggtactccgtgccagcagccgcggtatacgggggatgcaagcg  
ttatccggaatgattggcgtaaagcgtctgtaggtggccttttaagtccgcgtcaaatcccagggctcaactctggacagcggtggaaacta  
ccaagctggagtagcgttaggggagaggggaatccccggtggagcggtgaaatgcgtagagatcggaagaacaccaacggcgaaagcactct  
gctgggccgacactgacactgagagacgaaagctaggggagcgaatg

>d6eb6ac8ab8ea7a5de3ced31fc51500a

tagggaatcttcacaatggacgcaagtctgatggagcaacgccgcgtgagtgagaagggttttcggatcgtaaagctctgttgggtgaaga  
aggtagaggttagtaactggcctttatttgacggtaataaccagaaagtcacggctaactacgtgccagcagccgcggtatacgtaggtggc  
aagcgttgcggatttattggcgtaaagcgagcgagcggaataaagtctaattgaaagccctcggttaaccagggaactgcatcgg  
aaactgttttcttgagtcagaagaggagagtggaactccatgtgtagcggtggaatgcgtagatatatggaagaacaccagtgggcgaaaggcg  
gctctctggtctgcaactgacgctgaggctgaaagcatgggtagcgaaca

>d744fb02a7dba0b10878ad783c980f1b

tagggaatattggacaatggacgaaagtctgatccagcaacgccgcgtgaaggatgaaggcttaggattgtaaactcttttgacagggagga  
taatgactgtacctgtagaataagcaccggctaacttcgtgccagcagccgcggtatacgaagggtgccagcattactcggaatcactgggcg  
taaagaatgcgtaggcgacttgaagttaggagtgaaatccctgggctcaacctaggaactgctttaaaactgcttgccttgatgtagagtg  
gattaggggaattcttggttaggggtaaaatccgtagatatcaggaggaagaccggaagcgaaagcgcttaattagctagatatgacgctga  
tgcatgaaagcgtggggagcaaacaggattagatacccggttag

>d7e0bc436fc872df32bf245f73b65a28

tggggaatccccgcaatgggcgaaagcctgacggagcaatgccgctggaggtggaaggcctacgggtcgtcaacttcttttctcggagaaga  
aacaatgacggtatctgaggaataagcatcggtactctgtgccagcagccgcggtgaagacagaggatgcaagcgttatccggaatgattgg  
gcgtaaagcgtctgtaggtggcttttaagtccaccgtcaaattccagggctcaacctggacaggcgggtggaaactaccaagatggagtacgg  
taggggcagagggaatccccggtggagcggtgaaatgcattgagatcggaagaacaccaatggcaaaagcactctgctgggccgacactga  
cactgagagacgaaagctaggggagcaaatg

>d84065c2d950637296fd8d2110047cb9

tggggaatccccgcaatgggcgaaagcctgacggagcaatgccgctggaggtagaaggccacgggtcatgaacttcttttccggagaaga  
agcaatgacggtatctggggaataagcatcggtactctgtgccagcagccgcggtgaatacagaggatgcaagcgttatccggaatgattggg  
cgtaaagcgtctgtaggtggcttttaagtccgctcaaattccagggctcaactctggacaggcgggtggaaactaccaagctggagtacgga  
ggggcagagggaatccccggtggagcggtgaaatgcgtagagatcggaagaacaccaacggcgaaagcactctgctgggccgacactgaca  
ctgagagacgaaagctaggggagcgaatg

>d89562295d5f0058f04bce4ffe763344

taaggaatattggtcaatggacgaaagtctgaaccagccatgccgctggaggtagaaggctcctctggattgtaaacttcttttatatgggacga  
aaaaaggcttttctaagtcgtctgacggtaccatatgaataagcaccggctaactccgtgccagcagccgcggtgaatacggagggtgcaagcgt  
tatccggattcactgggttaaaggagcgttaggtgggtgataagtcagtggtgaaatctccagcttaactcggaattgccgttgatactatt  
agtcttgaatattgtggaggtcagcgggaatatgtcatgtagcggtgaaatgcttagatatgacatggaacaccaattgcaaggcagctggctac  
gcatatattgacactgaggctcgaaagcgtggggatcaaaaca

>d907f8a6295f731a1c79e17d4d990911

tggggaatccccgcaatgggcgaaagcctgacggagcaatgccgctggaggtagaaggccacgggtcatgaacttcttttccggagaaga  
agcaatgacggtatctggggaataagcatcggtactctgtgccagcagccgcggtgaatacagaggatgcaagcgttatccggaatgattggg  
cgtaaagcgtctgtaggtggcttttaagtccgctcaaattccagggctcaactctggacaggcgggtggaaactaccaagctggagtacgga  
ggggcagagggaatccccggtggagcggtgaaatgcgtagagatcggaagaacaccaacggcgaaagcactctgctgggccgacactgaca  
ctgagagacgaaagctaggggagcgaatgggattagataccctgtagt

>d92eeff90aec306248a73713ac09b0eb

tagggaatccccgcaatgggcgaaagcctgacggagcaataccgctgagggatgacggcctgtgggttgtaaacttcttttcaaggaaga  
agtctgacggtacttgaggaataagcatcggtactctgtgccagcagccgcggtgaatacagaggatgcaagcgttatccggaatcactggg  
cataaagcgtctgtaggtgttttagtaagtctgctgttaaagactggggctcaaccagaaaaagcagtggaactgctagacttgagtgtgga  
gaggtagagggaattcctagtgtagcggtgaaatgcgtagatattaggaagaacaccaatggcgaaggcactctactgggcataactgacac  
tgagagacgacagctaggggagcaaatg

>d992d93456ed538c4098b57fded59ef3

tgaggaatcttctgcaatgggcgaaagcctgacagagcaataccgctgagggatgaagacttactgagttgtaaactcgggtacctaaggaa  
gaagatctgacggtacttaaggtggaaagcatcggtactccgtgccagcagccgcggtgaagacgggggatgcaagtgttatccggtattact  
gggcgtaaagcgtctgacaggtggttttctaagtctactgttaaatcttgaggctcaacctcaaattctgagtagaaactagaagacttgagttag  
taggggtagagggaattccagtggagcggtgaaatgcgtagatattggaaagaacaccgatggcgaaggcactctactgggctattactgac  
actcagagacgaaagctaggggagcaaatg

>daad36a97029257a0e7d45a0e4c91723

tggggaatattgcacaatgggcgaaagcctgatgcagcaacccgctgagggacgacggccttcgggttgtaaacttcttttagcaggggaag  
aagcgaaagtgcggtacctgcagaaaaagcggcggtactacgtgccagcagccgcggtgaatacgtaggcgcaagcgttatccggaatta  
ttgggcgtaaagagctcgttaggcggtttgtcgctctgctgtgaaacccgaggctcaacctcgggcctgcagtggttacgggcagactagagt

gcggtagaggagattggaattcctggttagcgggtggaatgcgagatatcaggaggaacaccgatggcgaaggcagatctctgggccgtaac  
tgacgctgaggagcgaaaggggtggggagcaaaca

>db2a5104f2b7e6dfa1288cf38775327e

tggggaatTTTggacaatggggcgaaagcctgatccagcaatgccgcgtgtgtgaagaaggccttcgggttgtaaagcactTTTgtccggaaaga  
aatccttggtctataacagtcgggggatgacgggtaccggaagaataagcaccggctaactacgtgccagcagccgcggtatacgtagggtg  
cgagcgtaatacgggaattactgggcgtaaagcgtgcgagggcgggtgtgtaagacaggtgtgaaatccccgggcttaacctgggaactgcgctt  
gtgactgcacagctagagtacggcagaggggggtggaattccacgtgtagcagtgaaatgcgtagagatgtggaggaacaccgatggcgaag  
gcagccccctgggcctgtactgacgctcatgcagaaagcgtggggagcaaaca

>dbb9bc8820ba90527a8780d8b1f5fb47

tgaggaatTTTccgcaatgagcgaaagcttgacggagcaataccgcgtggaggacgaaggctcatgggttgtaaactcTTTcttaggaaaga  
atTTTgacggtacctaaggaataagcatcggctaattccgtgccagcagccgcggtgaagcgggagatgcaagcgttattcggtattattgggcg  
taaaggtctgtagggtgtcaattaagtctatggtcaaatccgaagctcaacttcgggccggcactagaaactaattgacttgagtacgttagag  
gcagggggaattccagtgtagcggtgaaatgcgtagatattgggaggaacatcaatggcgaaggcacctgctaggccgatactgacactga  
aagacgaaagctaggggagcaaag

>dc3163df0acc6285fa82db782747565f

ccaccttacctacgggggctgcagtgaggaatTTTccgcaatggggcgaaagcctgacggagcaataccgcgtggaggatgacggcctgtgggt  
cttaaactcTTTcttagagaagaagttctgacggtatctaaggaataagcatcggctaactccgtgccagcagccgcggtatacgggggatg  
caagcgttatccggaatgattgggcgtaaagcgtctgtagggtggcttccaagtcaactgtcaaaaatcagggttaaccttgaccggcagttg  
aaactatgaagcttgagttaggtaggggcagaggggaattcctagtgtagcggtgaaatgcgtagatattaggaagaacaccaatcgcaaaagc  
actctgctgggccatgactgacactgagagacgaaagctaggggagcgaatg

>dd308dfe1cc4bb7b84174931ac5e39a8

tggggaatTTTggacaatggggcgaaacccctgatccagccatgccgcgtgagtgaaagaaggccttcgggttgtaaagctTTTcaggtggaaaga  
aatcactacccgaatacgggtggtggatgacggtaccatcagaagaagcaccggctaactacgtgccagcagccgcggtatacgtagggtg  
cgagcgtaatacgggaattactgggcgtaaagcgtgcgagggcgggtgtgtaagacaggtgtgaaatccccgggcttaacctgggaactgcgctt  
gtgactgcacagctagagtacggcagaggggggtggaattccacgtgtagcagtgaaatgcgtagagatgtggaggaacaccgatggcgaag  
gcagccccctgggcctgtactgacgctcatgcagaaagcgtggggagcaaaca

>dd68c7b3d6b665f362d388f2f1be6663

tagggaatcttccgcaatggacgcaagtctgacggagcaacgccgcgtgagtgaaagaaggatttcggttcgtaaaactctgtttagagaaga  
acagcgcatagagtaactgttatgcgtgtgacggtatctaaccagaaagccacggctaactacgtgccagcagccgcggtatacgtagggtgc  
aagcgttgcggattattgggcgtaaagcgagcgagggcggtaattaagtctgatgtgaaagccccgggctcaaccggggagggtcattgg  
aaactggttgacttgagtcagaagaggagagtggaattccatgtgtagcggtgaaatgcgtagatatatggaggaacaccagtggcgaaggc  
gactctctggtctgtaactgacgctgaggctcgaaagcgtgggtagcaaaca

>dde5c80a3ae5f9f4fc154fca53d47c65

tagggaatcttccgcaatggacgaaagtctgacggagcaacgccgcgtgtatgaagaaggTTTTcggtatcgtaaaagtactgtttagagaaga  
acaaggataagagtaactgttgccttgacggtatctaaccagaaagccacggctaactacgtgccagcagccgcggtatacggagggtgc  
gagcgtaatacgggaattactgggcgtaaagcgcgctaggcggctaagttagtcagatgtgaaagccccgggctcaacctgggaattgcacctg  
atactgcttgctagagtacagaagagggtggtggaattcctgtgtagcggtgaaatgcgtagatataggaaggaacatcagtggcgaaggc  
ggccacctggactgatactgacgctgagggtcgaaagcgtggggagcaaaca

>de9c002e5dfaa2513a2f534e7801b528

tagggaatcttccgaatggacgaaagtctgacggagcaacgccgctgtgtgaagaaggcttccgcatcgtaaagcactgttattagagaaga  
acacccggtagagtaactgttaccggtctgacggatctaccagaaagccacggctaactacgtgccagcagccggttaatacgtaggtggc  
aagcgttctccggtatttattggcgtaaaggagcgcagggcggtgatttaagtctgatgtgaaagcccacggctcaaccgtggaaggctattgg  
aaactggatcacttgagtgcagaagaggaaagtgggaattccatgtgtagcggtgaaatgcgtagatatatggaggaacaccagtggcgaaggc  
gactttctggtctgtaactgacgtgaggctcgaagcatggggagcaaaca

>df13d60ffb78f06aac8b366bd669191a

tggggaatattggacaatgggcgaaagcctgatccagtgtatcgcttggggatgacggcgacatacgttgtaaaccaatgaagtacgttta  
gattatgaccgtacgtattttagaagtcccggctaactctgtgccagcagccggttaatacagagggggcaagcgttattcaaaatgattgggc  
gtaaagcgcacgtaggtggtgatgtatccataattattcaggctacaagtcttgcgatatttatgatgtatatgtatttcttgagggtgtgaga  
ggagcatggaatttcctaggaagcggtagaatgtgttgatctaggaaggaacaccaatagcgaagcagtgctctggcacattcctgacattga  
ggtgcgaaagcgtggggatcaaaag

>df3d6113f855e22f2a6d44e60f01baa7

tggggaatattgcacaatgggcgaaagcctgatgcagcaacgccgctgagcgatgaaggccttcgggtcgtaaagctctgtcctcaaggaa  
ataatgacgggtacttgaggaggaagccccggctaactacgtgccagcagccggttaatacgtagggggctagcgttatccgaattactgggc  
gtaaaggggtcgtaggtggtttcttaagttagaggtgaaaggctacggctcaaccgtagtaagccttgaaactgggaaacttgagtgcaggag  
aggagagtggaaattcctagtgtagcggtgaaatgcgtagatataggaggaacaccagttgcgaaggcggtctctggactgtaactgacactg  
aggcacgaaagcgtggggagcaaaca

>df829f8d3288011e9fbef9d3511e2e4c

tagggaatcttcacaatgggcgaaagcctgatggagcaacgccgctgtgtgatgaagggttccggctcgtaaaacactgttgtaagagaaga  
atgacattgagagtaactgttcaatgtgtgacggatatctaccagaaaggaacggctaatacgtgccagcagccggttaatacgtatgttcca  
agcgttatccggtatttattggcgtaaagcgagcgcagcgggtattttaagtctgaagtgaagccctcagctcaactgaggaattgcttggaa  
actggatgacttgagtgcagtagaggaaagtggaaactccatgtgtagcggtgaaatgcgtagatatatggaagaacaccagtggcgaaggcgg  
ctttctggactgtaactgacgttgaggctcgaagtggtggtagcaaaca

>e00229e46bf3f66c4ffd1b34f3d28b95

tggggaatattgcgaatgggcgaaagcctgacgcagccacgccgctgagcgatgaaggccttagggtcgtaaagctctgtggagggagaag  
aaacctgacggatcccttttagcaagcaccggctaactcgtgccagcagccggttaatacggaggggtgcaaacgttgctcgaatcattggg  
cgtaaagcacatgtaggcggtacgcaagtggatgtgaaagcccagggtcaaccttggaagtgcatacaaaactgcgtggcttgagttccgg  
aggggccagagaattcccgggtgtagaggtgaaattcgtagatatcgggaggaataccagtggcgaaggcgctgggctggacgggatactgacg  
ctgagatgtgaaagcgtggggagcaaaca

>e08e7bbe61ff67455f02b7db83918945

tagggaatcttgacaatgggcgaaagcctgatccagcaatacatgtgagtgtgaaggctatttagctgtaaagctcttcatcaaggaagat  
aatgacgggtacttgaagaagaagccccggctaaccctgtgccagcagccggttaagacaggggggctagtgttattcggaatgactgggcg  
taaaggggtcgtaggcggtaaataaagttgaagggtgaaatccaaagcttaacttggaaagtgcgttcaaaactatttgctagagtatgataga  
ggatagtggaatttctagtgtagagataaaattcgcaaagactagaaggaacaccagtggcgaaggcgactatctgggtcaatactgacgctg  
aggcacgaaagcatggggagcaaagc

>e094c0f86adf02b88862d68fa900feed

tagggaatcttccgaatggacgaaagtctgacggagcaacgccgctgtatgaagaagggttttcggatcgtaaagtactgtttagagaaga  
acaaggataagagtaactgcttgccttgacggatctaccagaaagccacggctaactacgtgccagcagccggttaatacgtaggtggc  
aagcgttctccggtatttattggcgtaaagcgcgcagggcggtcttttaagtctgatgtgaaagccccggctaaccggggaggggtcattgga  
aactggaagactggagtgcagaagaggagagtggaattccacgtgtagcggtgaaatgcgtagagatgggaaggaacatcagtggcgaagg  
cgactcactggactgatactgacactgaggtgcgaaagcgtgggtagcaaaca

>e1058c7ff3fb0b864735b0d3d2cdee72

tgaggaaatccccgcaatgggagcaagcctgacggagcaataccgcgtggaggatgacggcctgtgggtcttaaactccttttcttagagaaga  
agttctgacgggtatctaaggaataagcatcggctaactccgtgccagcagccggttaatacgggggatgcaagcgttatccggaatgattggg  
cgtaaagcgtctgtaggtggcctttcaagtcaactgtcaaaaatcagggcctaacttgagccggcagttgaaactatgaagcttgagttaggt  
ggggcagagggaattcctagtgtagcggtgaaatgcgtagatattaggaagaacaccaatcgcaagcactctgtggccatgactgacac  
tgagagacgaaagctaggggagcgaatgggattagataccccggtag

>e208c28191054d655aea79022ef47a06

tagggaatctccgcaatggacgaaagtctgacggagcaacgccgcgtgtatgaagaaggtttcggatcgtaaagtactgtttagagaaga  
acaaggataagagtaactgcttgccttgacggatcttaaccagaaagccacggctaactacgtgccagcagccggttaatacggagggtgc  
gagcgttaatcggaattactgggcgtaaagcgcgcgtaggcggccttgtaagtcggatgtgaaagccctgggctaacctgggaattgcactcg  
atactgcagagctagagtatggttagagggaagtggaaatccccggtgtagcggtgaaatgcgtagatatcggaaggaacaccagtggcgaaggc  
gacttcctgggccaatactgacgctgagggtgcgaaagcgtggggagcaaaca

>e22b45cc5c2b9e6cbdc849f8b00036c

tggggaatattggacaatgggagcaagcctgatccagcaatatcgctgagtgaagaaggctattttggtcgtaaagctcttctgtaggaag  
ataatgacgggtactcgaagaagaagtcgggctaactccgtgccagcagccggttaagacggaggggacgagtgtattcggaatgactggg  
cgtaaagggcagctagggcgtgaattaagttaaagcgaaatcccaaagcctaactttggaactgtttcaaaactgatttactggagttcgata  
ggggatagtggaatttctagttagaataagaattcataaattaggaaggaacaccagtggcgaaggcgactatctggatcgatactgacgct  
gaggtgcgaaagcatggggagcaaaca

>e293a4a9c3d5e6cfc55621b8c058045b

tgaggaaatattggacaatgggagcaagcctgatccagccatgccgcgtgaggatgaagcatctatggtgtgtaaactgctttgtacgagaag  
aaactgcaacgtgttcagctgacggatcgtaagaataaggatcggctaactccgtgccagcagccggttaatacggaggatccaagc  
gttatccggaatcattgggtttaagggtccgtaggcgggccaagtaagtcagtggtgaaatctccggctcaaccgggaaatggccattgatact  
gctggtcttgaaatttaggaagtaactagaatatgtagtgtagcggtgaaatgcttagagattacatggaataccaattgcaaggcaggttac  
tactaatggattgacgctgatggacgaaagcgtgggtagcgaaca

>e2a5a5b2e0703a3656f8a0e9795a031a

tttcgaatcattcacaatgggagcaagcctgatggtgcgacgccgcgtgaggatgaaggccttcgggttgtaaactcctgtcaccggggaaga  
aacgcttcaagtaatagcttgaaagcctgacttaacccggagaggaagcagtggttaactctgtgccagcagccggttaatacagagactgca  
agcgttatccggaatcattgggtttaagggtccgtaggcgggccaagtaagtcagtggtgaaatctccggctcaaccgggaaatggccattgatact  
aactacacggctagagcattggagagggtagcagaattcacggtgtagcagtgaaatgcgtagatatcgtaggaataccagaggcgaaggc  
ggctacctggacaattgctgacgctcaggcacgaaagcgtggggagcaaag

>e301db4993d117481300e9f0d72d7bb7

caaggaaatcttcgtaatgggagcaagcctgaacgagcaacgccgcgtggaggatgacggccttcgggttgtaaactcctttccgggggatgat  
agtaccgtaccctgggaataaggctcgctaactctgtgccagcagccggttaagacagaggagccaagcgttgcggattgactgggcgt  
aaagcgcacgcaggcgggtgggcacgtgggtgtgaaagcggccgcttaacgggccaaggccatcccatagggccgactggagcctggca  
gaggttcgtggaattgcgggtgtagtgggtgaaatgcgtagagatcggcaggaacaccaagggggaaccagcgaactgggccaagagctgacg  
ctcaggtgcgaaagcgtggggagcgaacc

>e349404d219f149d829618cd9650bf32

tggggaatctccgcaatgggagcaagcctgacggagcaatgccgcgtggaggtagaaggccacgggtcatgaactcttttctcagagaaga  
agcaatgacggatctgaggaataagcatcggctaactctgtgccagcagccggttaagacagaggatgcaagcgttatccggaatgattgg  
gcgtaaagcgtctgtaggtggcctttcaagtccgcgtcaaatccagggtcaaccctggacaggcgggtgaaactaccaagctggagtacgg

taggggcagaggaatttccggtggagcggtgaaatcgctagagatcggaagaacaccaacggcgaaagcactctgctgggcccgaactga  
cactgagagacgaaagctaggggagcaaatg

>e38f9e2b18a62d89a2dd8511cc8a43ad

tggggaatattgggcaatggacgaaagtctgaccagcaacgccgctgggggatgaaggccttagggtgttaaactccttttattaggggaaga  
tagtgacggtacctaataagaatcagcgttaactctgtgccagcagccgcggtatacgaaggatgctagcgttactcgggaattactgggcgt  
aaagaatgcgtagggcggcatttaagttgatatgcaatcccaagcttaacttaggaattgctatcaaaactaaatgccttgaatatgaaagg  
agcaagggaattcctggtgtaggggtaaaaatccgtagatatcaggaggaagaccggaagcgaaagcgcttgcttggttcattattgacgctgag  
gcatgaaagcgtaggggatcgaacaggattagatacccggtagtc

>e49ced5d648cd008cb8fbbb84b219c2d

cagggaatattgcacaatgggcgaaagcctgatgcagcaacgccgctgggggatgaaggccttagggtgttaaaccctttcaggagggaag  
aaattgacggtacctccaaaagaagccccggccaactacgtgccagcagccgcggtatacgtagggggcgagcgttgccgaatcattggg  
cgtaaagggctcgtagggcgtcagttagtcggctgtgaaatcccagggtcaaccctggaactgcagtcgatactgctgtggctagagtttgg  
agaggagaatggaattcccggtgtagcggtggaatgcgcagatatcgggaggaacaccagtagcgaaggcggttctctgggccaatactgacg  
ctgaggagcgaaagcgtaggggagcaaaca

>e6632ac9c710d04aa57f542d933fdd7c

tggggaatcttgacaatgggcgcaagcctgatccagccatgccgctgagtgatgaaggccttagggtcgtaaagctctttcgccagggatga  
taatgacagtacctggtaaagaacccccggctaactccgtgccagcagccgcggtatacggagggggttagcgttggtcgaattactgggcg  
taaagcgacgtaggcggatcagaaagttgggggtgaaatcccggggctcaaccgggaactgcctcaaaactcctggtcttgagttcgagag  
aggtgagtggaattccgagtgtagaggtgaaattcgtagatatcgggaggaacaccagtggcgaaggcggtcactggctcgatactgacgctg  
aggtgcgaaagtgtggggagcaaaca

>e68f9542b5b4ef063c352c3973e8521c

tgaggaatattcggaatgggggcaaccctgaccagcaacgccgctggaggatgacggttttcggttgtaaactccttttctcaggggaaga  
gcgaggacggtacctggggaataagtcacggctaactacgtgccagcagccgcggtatacgtaggtggcaagcgttatccggaattactggg  
cgtaaagcgacgcaggtggctgcttaagtctgacgtgaaagctcctggcttaactgggagaggtcgttgagactgggcggcttgagcgagg  
agaggggtgtagaattcccggtgtagtggtggaatgcgtagagatcgggaggaataccagtggcgaaagcggcaccctggccttgccctgacg  
ctcaggtgcgaaagcgtaggggagcgaacg

>e6c461ee005018c33202161446917049

tggggaatcttgacaatgggcgaaagcccgatccagcaatatcgctgagtgagaagggaatgccgcttgtaaagctctttcgtcgagtgc  
gcgatcatgacaggactcgaggaagaagccccggctaactccgtgccagcagccgcggtataagacgggggggcaagtgttcttcggaatgact  
gggcgtaaagggcacgtaggcggtgaatcgggttgaaagtgaagtcgcaaaaagtggcggaatgctctcgaaaccaattcacttgagtgag  
acagaggagagtgaatttcgtgtgtaggggtgaaatccgtagatctacgaaggaacgcaaaagcgaaggcagctctctgggtccctaccga  
cgctggggtgcgaaagcatggggagcgaacaggattagatacccggtagtc

>e70ea086af7238e1d7addef62a9e2fde

tagggaatcttgcaatgggcgaaagcctgacgcagcaatgccgctgcgggacgaaggccttagggtcgtaaaccgctttcagtagggacg  
aaaatgacggtacctgcagaagaagctccggccaactacgtgccagcagccgcggtatacgtagggagcaagcgttgccggaattactggg  
cgtaaagggctcgtaggtggttagtaagttagatgtgaaatctcagggcccaaccctgagcgtgcatttgatactgctctgactagagtcgggt  
aggggagtgcggaattcctggtgtagcggtgaaatgcgcagatatcaggaggaacaccgacagcgaaggcagcactctgggccggtactgac  
actgaggagcgaaagcatgggttagcaaaca

>e78b3edf997b6046c03ad4c3e640cdd4

tggggaatattgcgcaatgggcgaaagcctgacgcagcgacccgctgagggacgaaggcttctggattgtaaaccttttcagcagggatg  
aagcgaaagtgcagtagctgcagaagaagcaccggctaactacgtgccagcagccggttaatacgtaggggtgaagcgtgtccgattta  
ttgggctgaaagagctcgttaggcggctgtcgcgtcggtgtgaaaacccaatggcttaaccttgggcctgcatacgatacgggcagactagag  
tgcggtaggggagactggaattcctggtgtagcgggtggaatgcgcagatatcaggaggaacaccgatggcgaaaggcaggtctctgggccgtaa  
ctgacgctgaggagcgaaagcgtggggagcaaaca

>e7de1381c9f32010c03fb6b777b416c0

tggggaattttccgcaatgggcgaaagcctgacggagcaatgccgctggaggtggaaggcctacgggtcgtcaacttcttttctcggaaga  
aacaatgacggtatctgaggaataagcatcggttaactctgtgccagcagccggttaagacagaggatgcaagcgttatccggaatgattgg  
gcgtaaagcgtctgtaggtggcttttaagtccgccgtcaaataccagggtcaaccttgacagcggtggaactaccaagctggagtacgg  
taggggcagagggaatttccggtggagcgggtgaaatgcattgagatcggaagaacactaacggcgaaagcactctgctgggccgacactga  
cactgagagacgaaagctaggggagcaaatg

>e871f2c7a13331aad8aba52c17b4b3ea

tcgagaatcttccgcaatgggcgaaagcctgacggagcgacgccgctggaggacgaaggccttccgggtgttaaactcctgtcaggggaaga  
aaggccgagcaatcggttgcacccctggaggaagcacgggctaagttcgtgccagcagccggttaagacgaaccgtgcgaacgttatt  
cgggaatcactgggcttaagcgctgttagcggttgggtgcgtcggcgcctgaaatccccggctcaaccggggaacgtggccgaaacgacc  
agtctggagggcgtagggggaactggaacttccggtggagcgggtgatatgcgttgagatcggaaggaaacgcccggtggcgaaagcgagttcct  
ggacgcctgctgacgctgagacgcgaaagccagggtagcgaacg

>e89f13d4476a6aac75bc5c27fcb1d7fe

tggggaattttccgcaatgggcgaaagcctgacggagcaatgccgctggaggtggaaggcctatgggtcgtcaacttcttttctcggaaga  
aacaatgacggtatctgaggaataagcatcggttaactctgtgccagcagcccggttaagacagaggatgcaagcgttatccggaatgattg  
ggcgtaaagcgtctgtaggtggcttttaagtccgccgtcaaataccagggtcaaccgtggacagcggtggaactaccaagctggagtacg  
gtaggggcagagggaatttctggtggagcgggtgaaatgcattgagatcggaagaacaccaacggcgaaagcactctgctgggccgacactg  
aactgagagacgaaagctaggggagcaaatg

>e8b7de4c07f308c714246ef5c937f9c9

tggggaatcttgacaatgggcgaaagcccgatccagcaatatcgctgagtgagaagggaatgccgcttgtaaagctctttcgtcgagtgc  
gcgatcatgacaggactcgaggaagaagccccggctaactccgtgccagcagccggttaagacggggggggaagtgttcttcggaatgact  
gggcgtaaagggcacgtaggcggtgaatcggttgaaagtgaagtcgcaaaaagtggcggaatgctctcgaaaccaattcacttgagtgc  
acagaggagagtgaatttctgtgttaggggtgaaatccgtagatctacgaaggaaacgcaaaagcgaaggcagctctctgggtccctaccga  
cgctgggggtgcgaaagcatggggagcgaaca

>e8e068470c9fa4a80add9d39995d4252

taaggaatattggacaatgggcgaaagcctgatccagccatcccgcgtggaggatgactgccctacgggtgttaaactccttttatatgagaaga  
aacgcctggatttatccgggcctgacggtatcttatgaataagcaccggctaactccgtgccagcagccggttaatacggagggtgaagcgtt  
atccggaatcactgggtttaaagggtgcgtagcggttagttaagtgcagaggtgaaagcccggtcaacgtcggaattgcctttgatactggc  
taacttgaatcagggtgaggtgggcggaatgtggcatgtagcgggtgaaatgcatagatgcatagaaacacaaattgcgaaggcagctcactg  
gcctgcatgacgctgaggcacgaaagcgtggggagcgaaca

>e94a13a5e4c68e630850a0d843b36e7e

tggggaattttggacaatgggcgaaagcctgatccagccatgccgctgtgggaagaaggccttccgggtgtaaaccacttttgcaggaaga  
aacggttgacttaatacgttgaaactaatgacggtacctgaagaataagcaccggctaactacgtgccagcagccggttaatacgtagggtgc  
aagcgttaatcggaattactggcgtaaagcgtgcgcaggcggtttgaagacagatgtgaaatccccgggtcaacctgggaactgcatttg  
tgactgcatggctagagtacggttaggggggatggaattccgctgtagcagtgaaatgcgtagatatgcggaggaacaccgatggcgaaaggc  
aatccctggacctgtactgacgctcatgcagaaagcgtggggagcgaaca



>eabef75613caeaaf66d8f72ece33ff98

tggggaatattgcacaatgggcgcaagcctgatgcagccatgccgcgtgtgtgaagaaggccttcgggttgtaaagcactttcagtcgtgagga  
agggtgtagtgtaatagcactatcatttgacgttagcgacagaagaagcaccggctaactccgtgccagcagccgcggtataacggagggtgc  
gagcgttaacggaattactgggcgtaaagcgtacgcaggcggtttgttaagcgagatgtgaaagccccgggctcaacctgggaactgcatttc  
gaactggcaactagagtgtgatagagggtggtagaatttcagggtgtagcggtgaaatgcgtagagatctgaaggaataccgatggcgaaggc  
agccacctgggtcaacactgacgctcatgtacgaaagcgtggggagcaaaca

>eaeaed05611e993f4383055a77762c33

tggggaatccccgcaatgggcgaaagcctgacggagcaatgccgcgtggagggtggaaggcctacgggtcgtcaacttcttttcgagagaaga  
aacaatgacggtatctgaggaataagcatcggtactctgtgccagcagccgcggttaagacagaggatgcaagcgttatccggaatgattgg  
gcgtaaagcgctgtaggtggctttcaagtcgccgtcaaataccagggtcaacctggacaggcggtgaaactaccaagctggagtacgg  
taggggcagagggaatccccggtggagcggtgaaatgcattgagatcggaagaacaccaacggcgaaagcactctgctgggcccagactga  
cactgagagacgaaagctaggggagcaaatg

>ebbee8345c0db5ed47362d0bd541402e

tggggaatccccgcaatgggcgaaagcctgacggagcaataccgcgtgagggtgacggcctatgggttgtaaacctcttttcaggaggga  
atcaatgacgtgtacctgaagaataagcatcggtactccgtgccagcagccgcggttaagacggaggatgcaagtgttatccggaatcactgg  
gcgtaaagcgtctgtaggtggccaataagtcaactgttaaactcttgaggctcaacctcaaatcgagtcgaaactattagactagagtatagt  
aggggtaaagggaatccagtgagcggtgaaatgcgtagagattggaagaacaccgatggcgaaggcactttactgggctattactaaca  
ctcagagacgaaagctagggtagcaaatg

>ec098ad12ef2923b449a01762462578b

tagggaatcttcgcaatggacgaaagtctgaccgagcaacgccgcgtgagtgaagaagggttttcggatcgtaaaactctgttgtagagaaga  
acgttggtgagagtggaaagctcatcaagtgcggtaactaccgaaaggagcggtactacgtgccagcagccgcggtataacgtagggtc  
ccgagcgttgcggatttattgggcgtaaagcgagcgaggtgggttattaagcttggtgtaaaggcagtggtcaaccattgtatgcattgga  
aactggtagacttgagtcaggagaggagagtggaattccatgtgtagcggtgaaatgcgtagatatatggagggaacaccggtggcgaaagcg  
gctctctggcctgtaactgacactgaggctcgaaagcgtggggagcaaaca

>ec7e081e7a9c7a218c1ba9d999cadc46

tggggaatcttgacaatgggcgaaagcccgatccagcaatatcgcgtagtgaagaagggaatgccgcttgtaaagctctttcgttgagtgc  
gcgatcatgacaagactcgaggaagaagccccggctaactccgtgccagtagccgcggttaagacgggggggggggcaagtgttcttcgaaat  
gactgggctgaaaggcacgtaggcggtgaatcggttgaaagtgaagtgcgaataagtggtggaattctctcgaaaccaattcacttgag  
tgagacagaggagagtggaattctgtgttaggggtgaaatctgtagatctacgaaggaaacacaaaagcgaaggcagctctctgggtcccta  
ccgacgctggggtgcgaaagcatggggagcgaaca

>eca6f7993f6fc5a4be346d425d8eb8e6

tggggaatattgcgcaatgggcgaaagcctgacgcagcgacgccgcgtgaggagcagcgcccttcgggttgtaaacctcttcagcagggacg  
aaaatgacggtacctgcagaagaagcaccggctaactacgtgccagcagccgcggttaacgtagggtgcaagcgttgcggatttattgggc  
gtaaagagctcgtaggcggtctgtcgcgtcggtgtgaaaacttggggctcaacctgagcttgattcgatacgggcagactagaggattgca  
gggggagactggaattctggtgtagcgggtggaatgcgcagatatcaggaggaacaccgggtggcgaaggcgggtctctgggcaattactgacgc  
tgaggagcgaagcgtggggagcaaaca

>ed26e6a1f558f75e04f278bfea71336c

tggggaatattggacaatgggcgcaagcctgatccagcaatgccgcgtgagtgtgaaggccttcgggttgtaaagctcttcgcacgcgacga  
tgatgacggtagcgtgagaagaagccccggctaactctgtgccagcagccgcggttaacgaaggggctagcgttgcggaattactgggcg  
taaagggcgcgtaggcggtgtgtcaagtcaggcgtgaaagccccgggtcaacctgggaaccgcgcttgagactggcacgctcgagttcggga

gaggatggtggaattcccagtgtagaggtgaaattcgtagatattgggaagaacaccgatggcgaaggcagccatctggaccgacactgacgc  
tgaggcgcgaaagcgtggggagcaaaca

>edca45bc748f10fbd6a8314634401453

tggggaatattgcgcaatgggcgaaagcctgacgcagcgacccgctgagggacgaaggtcttcggattgtaaaccttttcagcagggacg  
aagcgaaagtgactgtacctgcagaagaagcaccggctaactacgtgccagcagccgcgtaatacgtagggtgcaagcgttgccggattat  
tgggcgtaaagagctcgtagggcgtctgtcgcgtcggtatgtgaaaaccaatggcttaaccttgggcctgcattcgatacgggcagactagagt  
gtggtaggggaaactggaattcctggtgtagcgggtggaatgcgcagatatcaggaggaacaccgatggcgaaggcaggtttctgggcataac  
tgacgctgaggagcgaaagcgtggggagcaaaca

>ede5e8c8c62c4609d98e2c130d1c4e90

tggggaatttccgcaatgggcgaaagcctgacggagcaatgccgcgtggaggtagaaggcccacgggtcatgaacttctttccggagaag  
aagcaatgacggtatctggggaataagcatcggctaactctgtgccagcagccgcgtaatacagaggatgcaagcgttatccggaatgattgg  
gcgtaaagcgtctgtaggtggcttttaagtccgccgtcaaattcccagggtcaactctggacagggcgttgaaactaccaagctggagtacggt  
aggggcagagggaaattccggtggagcgggtgaaatgcgtagagatcggaagaacaccaacggcgaaagcactctgtgggccgacactgac  
actgagagacgaaagctaggggagcgaatg

>eefe9cbaae27d5ee618e0fd3e48dbb14

tggggaatattggacaatgggggaaaccctgatccagcaatgccgcgtgtgtgaagaaggcctgcgggtgtaaagcactttcagtagagaag  
aaaagcctatggttaataaccgtgggtcttgacgtaacctacagaagaagctccggctaactccgtgccagcagccgcgtaatacggaggga  
gcgagcgttaatcggaattactgggcgtaaagcgcgctagggcgctttgtaagtcggtatgtgaaagccctgggctcaacctgggaattgcact  
cgatactgcagagctagagtatggtagagggaagtggaatttccggtgtagcgggtgaaatgcgtagatatcggaaggaacaccagtggcgaag  
gcgacttctgggccaatactgacgctgaggtgcgaaagcgtggggagcaaaca

>f13e19ab6677af0872877e771d828137

tggggaatttccgcaatgggcgaaagcctgacggagcaatgccgcgtggaggtagaggcctctgggtcatgaacttctttccggagaagaa  
aaaatgacggtatccggggaataagcatcggctaactctgtgccagcagccgcgtaagacagaggatgcaagcgttatccggaatgattggg  
cgtaaagcgtctgtaggtggcttttaagttcgtgtcaaataaccagggtcaaccttgacaggtggtgaaaactactaagctagagtacggtg  
ggggcagagggaaattccggtggagcgatgaaatgcgtagagatcggaaggaacaccaacggcgaaagcactctgtgggccgacactgaca  
ctgagagacgaaagctaggggagcgaatg

>f14141d03c23f3658014090c72c23866

tagggaatcttcacaatggacgcaagtctgatggagcaacgccgcgtgagtgaagaaggttttcggatcgtaaagctctgttgttggtgaaga  
aggatagaggtagtaactggcctttatttgacggtaatcaaccagaaagtcacggctaactacgtgccagcagccgcgtaatacgtaggtggc  
aagcgttgccgatttattgggcgtaaagcgagcgagcggaagaataagtctgatgtgaaagccctcggttaaccgaggaactgcacgg  
aaactgttttcttgagtgcagaagaggagagtggaactccatgtgtagcgggtggaatgcgtagatatatggaagaacaccagtggcgaaggcg  
gctctctggtctgcaactgacgctgaggctcgaaagcatgggtagcgaaca

>f1c0b9b1939edb9092f76db8621ea38f

tggggaatattggacaatgggcgaaagcctgatccagccatgccgcgtgtgtgaagaaggtcttcggattgtaaagcactttaagttgggagga  
agggtttagcttaatacgtgcaaccttgacgttaccaacagaataagcaccggctaactctgtgccagcagccgcgtaatacagagggtgc  
aagcgttaatcggaattactgggcgtaaagcgcgcgtagggcgcttgataagatgggtgtgaaatccccgggcttaacctgggaactgcacca  
taactgtctggctagagtacgtagagggtggtggaatttctgtgtagcgggtgaaatgcgtagatataggaaggaacaccagtggcgaaggcg  
accacctggactgatactgacgctgaggtgcgaaagcgtggggagcaaaca

>f21040166a8a29c0a2e34173c51e4bb5

tggggaatccccgcaatgggcgaaagcctgacggagcaatgccgctggaggtagaaggccacgggtcatgaactcttttccggagaaga  
agcaatgacggatatctggggaataagcatcggtactctgtgccagcagccgcggtataacagaggatgcaagcgttatccggaatgattggg  
cgtaaagcgtctgtaggtggcttttaagtccgctcaaatcccagggtcaactctggacaggcggtggaaactaccaagctggagtacggt  
ggggcagagggaatccccggtagcggtgaaatgcgtagagatcggaagaacaccaacggcgaaagcactctgctgggccgacactgaca  
ct

>f279ba5e72083ec5c385be0aa40168c2

tggggaatcttgacaatgggcgaaagcccgatccagcaatatcgctgaatgaagaagggaatgccgcttgtaaagctctttcgtcgagtgc  
gcgatcatgacaggactcgaggaagaagccccggctaactccgtgccagcagccgcggtataacggggggggcaagtgttcttcggaatgact  
gggcgtaaagggcacgtaggcggtgaatcggttgaaagtgaagtcgcaaaaagtggcggaatgctctcgaaaccaattcacttgagtga  
acagaggagagtggaaatctgtgttaggggtgaaatccgtagatctacgaaggaaacgcaaaagcgaaggcagctctctgggtccctaccga  
cgctggggtgcgaaagcatggggagcgaaca

>f2c12d84846d66c69e5d3b6f247b687f

tagggaatcttcgcaatggacgaaagtctgacggagcaacgccgctgtatgaagaaggccttttggttgtaaagcactttaagcgaggagga  
ggctaccgagattaatactcttgatagtgacgttactcgagaataagcaccggctaactctgtgccagcagccgcggtataacagagggtg  
caagcgttaatcggaattactgggcgtaaagcgcgctaggtggccaattaagtcaaatgtgaaatccccgagcttaacttggaattgcattcg  
atactggttggttagatgggagaggatggtagaattccagggtgtagcggtgaaatgcgtagagatctggaggaataccgatggcgaaggc  
agccatctggcctaatactgacactgaggtgcgaaagcatggggagcgaaca

>f2f9aa93e31efe482f836c89e44f5635

tggggaatcttgacaatgggcgaaagcccgatccagcaatatcgctgagtgagaagggaatgccgcttgtaaagctctttcgtcgagtgc  
gcgatcatgacaggactcgaggaagaagccccggctaactccgtgccagcagccgcggtataacggggggggcaagtgttcttcggaatgact  
gggcgtaaagggcacgtaggcggtgaatcggttgaaagtgaagtcgcaaaaagtggcggaatgctctcgaaaccaattcacttgagtga  
acagaggagagtggaaatctgtgttaggggtgaaatccgtagatctacgaaggaaacgcaaaagcgaaggcagctctctgggtccctaccga  
cgctggggtgcgaaagcatggggagcgaacaggattagatacccggtgtag

>f33d52caf28dd26a8da9b90d8d6374ab

tggggaatcttgacaatgggcgaaagcccgatccagcaatatcgctgagtgagaagggaatgccgcttgtaaagctctttcgtcgagtgc  
gcgatcatgacaggactcgaggaagaagccccggctaactccgtgccagcagccgcggtataacggggggggcaagtgttcttcggaatgact  
gggcgtaaagggcacgtaggcggtgaatcggttgaaagtgaagtcgcaaaaagtggcggaatgctctcgaaaccaattcacttgagtga  
acagaggagagtggaaatctgtgttaggggtgaaatccgtagatctacgaaggaaacgcaaaagcgaaggcagctctctgggtccctaccga  
cgctggggtgcgaaagcatggggagcgaacaggattagatacccggtgtag

>f487f0b5f9e5ec05065c687066960220

tagggaatcttcacaatggacgcaagtctgatggagcaacgccgctgagtgagaagggttttcggatcgtaaagctctgtgttggtgaaga  
aggatagaggtagtaactggcctttatttgacggtaatcaaccagaaagtcacggctaactacgtgccagcagccgcggtataacgtaggtggc  
aagcgttgcggatttattgggcgtaaagcgagcgagcggaagaataagtctgatgtgaaagccctcggttaaccgaggaactgcatcgg  
aaactgttttcttgatgcagaagaggagagtggaaactccatgtgtagcggtggaatgcgtagatatatggaagaacaccagtggcgaaggcg  
gctctctggtctgcaactgacgctgaggctcgaaagcatgggtagtgaaca

>f4a18715487abbc3431cc939c4e66d8b

tggggaatccccgcaatgggcgaaagcctgacggagcaatgccgctggaggtagaaggccacgggtcatgaactcttttccggagaaga  
agcaatggcggtatctggggaataagcatcggtactctgtgccagcagccgcggtataacagaggatgcaagcgttatccggaatgattggg  
cgtaaagcgtctgtaggtggcttttaagtccgctcaaatcccagggtcaactctggacaggcggtggaaactaccaagctggagtacggt  
ggggcagagggaatccccggtagcggtgaaatgcgtagagatcggaagaacaccaacggcgaaagcactctgctgggccgacactgaca  
ctgagagacgaaagctaggggagcgaatg

>f4ad46eb826b9b885a5b2a4237bb2435

tgagggaattttctgcaatgggcgaaagcctgacagagcaataccgcgtgggggatgaagacttactgagttgtaaacctcggtaccctaaggaa  
gaagatatgacggtaggttaggtggaaagcatcggtactccgtgccagcagccgcggttaagacgggggatgcaagtgttatccggatttact  
gggcgtaaagcgtctgcaggtgggtttttaagtctactgttaaatcttgaggctcaacctcaaactctgcagtagaaactaggagacttgagtatag  
taggggtagagggaatttcagtgaggcgggtgaaatgcgtagatattggaaagaacaccgatggcgaaggcactctactgggctattactgac  
actcagagacgaaagctaggggagcaaatg

>f579c8348a414fa66afc693b36cd87d1

tggggaatattgcacaatgggcgaaagcctgatgcagccatgccgcgtgtatgaagaaggccttcgggttgtaaagtactttcagttgtgagga  
agggtgtgtagttaatagctgcgcattgacgttagcaacagaagaagcaccggctaactccgtgccagcagccgcggttaatacgggggatg  
aagcgttatccggaatgattgggcgtaaagcgtctgtaggtggcttttaagtcgcgctcaaatcccagggtcaactctggacaggcgggtgga  
aactaccaagctggagtacggttagggcagagggaatttcgggtggagcgggtgaaatgcgtagagatcggaagaacaccaacggcgaaag  
cactctgctgggcccagactgacactgagagacgaaagctaggggagcgaatg

>f5dfca2eea90cca7c7e732418a9fa5fa

taaggaatattggacaatggacgcaagtctgatccagccatgccgcgtgggtgagtgacggccttcgggttgtaaacccttttatgtggggata  
atgtggttctatatgggccattgcaggtaccacatgaataagcaccggctaactacgtgccagcagccgcggttaatacgtagggtgcaagcgttg  
tccgatttattgggttaaagggtgcgcaggcggcttattaagttagtggtgaaatcaccggctcaaccgggtaccgccattgatactgtaa  
gcttgagtatgttcgaggagattggaacgtgtagttagcggtgaaatgcagatattacgcagaacaccaattgcgaaggcagatctctggg  
acataactgacgtgaggcacgaaagcgtggggagcgaaca

>f67d7ff7cf8b9b950e802bc307642b82

tggggaattttccgcaatgggcgaaagcctgacggagcaatgccgcgtggaggtagaaggcccacgggtcgtaacttctttccgggagaaga  
agcaatgacggtagtctgaggaataagcatcggtactctgtgccagcagccgcggttaagacagaggatgcaagcgttatctggaatgattgg  
gcgtaaggcgtctgtaggtggcttttaagtcgcgctcaatcccagggtcaacctggacaggcgggtgaaactaccaagctggagtacgg  
taggggcagagggaatttcgggtggagcgggtgaaatgcgtagagatcggaagaacaccaacggcgaaagcacctgtctgggcccagactga  
cactgagagacgaaagctaggggagcgaatg

>f7935da54a9f99b58a368c52bc9871b7

tggggaatattgcacaatgggcggaagcctgatgcagcaacgccgcgtgaggatgacggccttcgggttgtaaaccgctttcatccatgacga  
agcgagagtacggtagtgggagaagaagcaccggctaactacgtgccagcagccgcggtgatacgtagggtgcgagcgtgtccggatttat  
tgggcgtaaagagctttaggcggtttgtcgcgtcgggagtgaactcagggttaacctgagcctgctttcgatagggcagacttgaggaa  
ggtaggggagaatggaatttctggtgaagcgggtgaaatgcgtagatatcagaaggaaacacagtgggcgaaggcgggttctctggaccttctga  
cgctgagaagcgaaagcgtggggagcgaaca

>f798c7b55301016fd559eaa70cf87900

tcgagaatcttcggcaatgggcgcaagcctgacagcagcgcgcgtgtgggatgaaggccttcgggttgtaaaccactgtcagaggggatg  
aaatgcgggtgggttctccatccgtttgacatagcctcagaggaagcaggggctaagttcgtgccagcagccgcggttaatacgaactgtcaa  
acgttattcggaatcactgggcttaagggtgcgtagggcggccagataagtagggtgtgaaagccccggctcaaccggggaatggcgcttaa  
actgtctggctggagtgaataggggtgtgcggaacttcgggtggagcgggtgaaatgtgttgatatcggaaggaaacgcgggtggcgaaagcgg  
cacactggatctcaactgacgtgaggcacgaaagccaggggagcaaacg

>f849e5d3fd5ae6d42d6e7fcf1bc243ee

tgggggatattgcacaatgggcgcaagcctgatgcagcgacgccgcgtgagggatgacggccttcgggttgtaaacctcttcgctaccgaaca  
aggctccatattggtggggttagggtaggtggataagaagcgccggctaactacgtgccagcagccgcggttaatacgtaggcgcgagcgtt  
gtccggaattattgggcgtaaagagctcgtaggcggcttgcgcgtctgctgtgaaacgcggggcttaactccgcgctgcagtggttacgggc

aggctagagtgtggtaggggtgactggaattcctggttagcggtggaatgcgcagatatcaggaggaacaccgatggcgaaggcaggtcact  
gggccattactgacgctgaggagcgaaagcatggggagcgaaca

>f8785a63a5bcea2f3adb57194d11bcb9

tagggaatattgggcaatggaggaaactctgaccagccatgccgcgtgaaggatgaaggctctacggattgtaaacttcttttattaggggaag  
aaacgtctcgattcatcggtattgacggtaacctaaaggaataagcaccggctaactccgtgccagcagccgcggtatacggaggggtgcaagcg  
ttatccggattcactgggtttaaagggtgcgtaggtggtgattgataagtcagtggtgaaagccccgagctcaacttgggaattgccattgatactgt  
tagtcttgagttcggttaggttagcggaataagtcagtgtagcggtgaaatgcttagatatgacttagaacaccgatcggaaggcagcttacca  
agccgacactgacactgaggcacgaaagcgtggggatcaaaca

>f8b1222d060b5192a5b0f025b2aa44bb

tccggaatcttgacaattggcgaaagccagatccagccatattacgtgaaggatgaagactttttggtgtaaacttctttactttttaagtta  
aagagtataaaaagccccggctaatactgtgccagcagccgcggtataacagatggggcaagtgttattcggaatgattggcgtaagggtgta  
cgtaggtggttttattagtcagttgtcacaaccttttagaaaagaatcgagctttaaaagactacaaaacttgagttgatagaggaaagcgg  
aattttgagtgagagatagaattcatagatatcaaaggaacaccgaaaacgaaggtagctttctgggtcaacactgacgctcatgtacgaa

>f91b00381116d19f841d5805847ee161

tggggaatttccgcaatgggcgaaagcctgacggagcaatgccgcgtgaaggcagaaggcccacgggtcatgaacttcttttctcgagaaga  
aaaaatgacgggtatctgaggaataagcatcggtactctgtgccagcagccgcggtgaagacagaggatgcaagcggtatccggaatgattgg  
gcgtaaagcgtctgtaggtggcttttaagtcgccgtcaaataccagggctcaacctggacagggcgggtgaaactaccaagctggagtacgg  
taggggcagagggaatttccggtggagcggtgaaatgcgttagatcggaagaacaccaacggcgaaagcactctgctgggccgacactga  
cactgagagacgaaagctaggggagcaaatg

>f9c27874a3bd6b3338bb3f4741b1d337

tggggaatttccgcaatgggcgaaagcctgacggagcaatgccgcgtggaggtagaggcccctgggtcatgaacttcttttccggagaagaa  
aaaatgacgggtatccggggaataagcatcggtactctgtgccagcagccgcggtgaagacagaggatgcaagcggtatccggaatgattggg  
cgtaaagcgtctgtaggtggcttttaagttcgttgtaaaataccagggctcaacctggacaggtggtgaaaactactaagctagagtacggtg  
ggggcagagggaatttccggtggagcggtgaaatgcgttagatcggaagaacaccaacggcgaaagcactctgctgggccgacactgaca  
ctgagagacgaaagctaggggagcgaatg

>fa232cdccf10ffa5f666dfa77563e84e

tggggaatttccgcaatgggcgaaagcctgacggagcaatgccgcgtggaggtggaaggcctacgagtcgtcaacttcttttctcgagaaga  
aacaatgacgggtatctgaggaataagcatcggtactctgtgccagcagccgcggtgaagacagaggatgcaagcggtatccggaatgattgg  
gcgtaaagcgtctgtaggtggcttttaagtcgccgtcaaataccagggctcaacctggacaggtggtgaaaactactaagctagagtacggtg  
taggggcagagggaatttccggtggagcggtgaaatgcgttagatcggaagaacaccaacggcgaaagcactctgctgggccgacactga  
cactgagagacgaaagctaggggagcgaatg

>fa23a2f9dee1fc701797ae68535a98d5

tggggaatattggacaatgggcgcaagcctgatccagccatgccgcgtgagtgatgaaggccttagggtgtaaagctcttctgctccgggacgat  
aatgacggtaaccggaagaagaagccccggctaacttctgtgccagcagccgcggtatacgaagggggctagcgttggtcgaatcactgggcg  
taaagggcgcgtagcgccattcaagtcgggggtgaaagcctgtggcttaaccacagaattgccttcgatactgtttggcttgagaccggaag  
aggtaagtggaactgcgagtgtagagtgaaattcgtagatatcgcaagaacaccagtgggcgaaggcggcttactgggtccggttctgacgctg  
aggcgcgaaagcgtggggagcaaca

>fe8125f8bd994e1de94dc689dcd87b93

tgaggaatattgggcaatggaggcaactctgaccagccatgccgcgtgcaggaagacggccctatgggtgtaaactgctttatacaggaag  
aaacactgctactgttagcagctgacgggtactgtaagaataagcaccggctaactccgtgccagcagccgcggtatacgggggatgcaagc

gttatccggaatgattgggcgtaaagcgtctgtaggtggctttttaagtcgccgtcaaattcccagggtcaactctggacaggcggtggaaact  
accaagctggagtagcgtaggggcagaggggaatttcgggtggagcggtgaaatgcgtagagatcggaaagaacaccaacggcgaaagcact  
ctgctgggccgacactgacactgagagacgaaagctaggggagcgaatg

>fea58baacaed7fed052727e0dc6fca86

tagggaatcttcgcaatggacgaaagctgacggagcaacgccgctgtatgaagaaggtttcggatcgtaaagtactgtttagagaaga  
acaaggataagagtaactgttgccttgacggatctaaccagaaagccacggctaactccgtgccagcagccggtataacggagggtgc  
gagcgtaatcggaattactggcgtaaagcgcacgcaggcggtttgttaagctagatgtgaaagccccgagctcaacttgggatggtcatttag  
aactggcagactagagtcttgagaggggagtggaattccagggttagcggtgaaatgcgtagatatctggaggaacatcagtggcgaaggcg  
actccctggccaaagactgacgctcatgtgcgaaagtgtgggtagcgaaca

>ff581c00dc3966b25d46a2e627dc18df

tgaggaatcttcgcaatgggcgaaagcctgacggagcaataccgctgagggatgaaggattttggtctgtaaacccttttctcaagaaagaa  
gttctgacggtacttgaggaataagcatcggtactccgtgccagcagcccggtataacgggggatgcaagcggtatccggatttattgggcg  
taaagcgctgtaggtttgtaataagtctgttgtaaaagactagggcttaaccctaggaaagcaatggaaactactagacttgagtatgatagg  
ggtagagggaatttctagtgtagcggtgaaatgcgtagatattagaaagaacaccgggtggcgaaggcgctctactggatcattactgacactca  
gaggcgaaagctagggtagcaaaag

>ffa5266b3d35614dbc0f2f0c9ea2924f

tggggaatattgcacaatgggcgcaagcctgatgcagccatgccgctgtatgaagaaggccttcgggtgttaaagtactttcagtcgtgagga  
aggcatttgcttaatagcgtaagtgttgacgttagcgacagaagaagcaccggctaactccgtgccagcagcccggtataacggagggtgc  
gagcgtaatcggaattactggcgtaaagcgcatgcagggtggttcgttaagtcagatgtgaaagccccggggctaacctcggaattgcatttga  
aactggcggactagagtctgtagaggggggtagaatttcagggttagcggtgaaatgcgtagagatctgaaggaataccgggtggcgaaggcg  
gccccctggacagacactgacactcagatgcgaaagcgtggggagcaaaaca
